# Supplementary material for: Whole Genome and Global Gene Expression Analyses of the Model Mushroom Flammulina velutipes Reveal a High Capacity for Lignocellulose Degradation
Source: PLoS One. 2014 Apr 8;9(4):e93560. doi: 10.1371/journal.pone.0093560 (PMC3979922; doi:10.1371/journal.pone.0093560)
Supplement: Table S6 — Inparalogs and orthologs of predicted genes of F. velutipes . (XLS) [file pone.0093560.s008.xls]

## Sheet: Table S6
Table S6. Inparalogs and orthologs of predicted genes of F. velutipes.
ORF ID	F. velutipes (in-paralogs)	S. commune	C. cinerea	L. bicolor	P. chrysosporium	P. placenta	C. neoformans	U. maydis	S. cerevisae	A. nidulans	N. crassa	Specificity
ctg01_AA_00001												F.velutipes
ctg01_AA_00002												F.velutipes
ctg01_AA_00003												F.velutipes
ctg01_AA_00004												F.velutipes
ctg01_AA_00005												F.velutipes
ctg01_AA_00006												F.velutipes
ctg01_AA_00007	ctg11-1_AA_00065	XP_003035041.1	XP_001833477.1	XP_001878648.1	Pha_64820		XP_568076.1		NP_011266.1	XP_658433.1	XP_957708.2	Dikarya
ctg01_AA_00008												F.velutipes
ctg01_AA_00009												F.velutipes
ctg01_AA_00010	ctg01_AA_00020ctg01_AA_00029ctg01_AA_00031ctg01_AA_00049ctg01_AA_00052ctg01_AA_00053ctg01_AA_00056ctg01_AA_00068ctg01_AA_00072ctg01_AA_00077ctg01_AA_00078ctg01_AA_00079ctg01_AA_00082ctg01_AA_00084ctg01_AA_00087ctg01_AA_00093ctg01_AA_00097ctg01_AA_00099ctg01_AA_00433ctg05_AA_01167ctg05_AA_01207ctg05_AA_01819ctg05_AA_01823ctg13_AA_00030ctg13_AA_01042ctg26_AA_00061ctg26_AA_00089											F.velutipes
ctg01_AA_00011												F.velutipes
ctg01_AA_00012	ctg01_AA_00036ctg01_AA_00052ctg05_AA_01531ctg06_AA_00386ctg11-1_AA_00450ctg11-1_AA_00457ctg11-1_AA_00472ctg11-2_AA_00787ctg11-2_AA_00788ctg11-2_AA_00789ctg13_AA_01032ctg13_AA_01037ctg29_AA_00140ctg29_AA_00145ctg29_AA_00150ctg29_AA_00165ctg29_AA_00462ctg29_AA_00477ctg29_AA_00478ctg29_AA_00495ctg29_AA_00504ctg29_AA_00714ctg29_AA_00726											F.velutipes
ctg01_AA_00013												F.velutipes
ctg01_AA_00014	ctg01_AA_00015											F.velutipes
ctg01_AA_00015	ctg01_AA_00014											F.velutipes
ctg01_AA_00016	ctg33_AA_01070	XP_003028549.1	XP_001828335.1	XP_001878399.1 XP_001878401.1								Agaricales
ctg01_AA_00017	ctg33_AA_01071	XP_003028868.1 XP_003028338.1	XP_001830094.2	XP_001873700.1 XP_001889761.1 XP_001878051.1	Pha_73815							Agaricomycetes
ctg01_AA_00018												F.velutipes
ctg01_AA_00019												F.velutipes
ctg01_AA_00020	ctg01_AA_00029ctg01_AA_00031ctg01_AA_00049ctg01_AA_00052ctg01_AA_00053ctg01_AA_00056ctg01_AA_00072ctg01_AA_00077ctg01_AA_00078ctg01_AA_00084ctg01_AA_00087ctg01_AA_00093ctg01_AA_00097ctg01_AA_00099ctg01_AA_00132ctg01_AA_00433ctg01_AA_00509ctg05_AA_01167ctg05_AA_01207ctg05_AA_01819ctg05_AA_01823ctg13_AA_00008ctg13_AA_00024ctg13_AA_00030ctg13_AA_00035ctg13_AA_00040ctg13_AA_00044ctg13_AA_00045ctg13_A…											F.velutipes
ctg01_AA_00021	ctg06_AA_00252ctg11-1_AA_00820ctg11-2_AA_00820		XP_001840080.2 XP_001832073.2 XP_001839724.2	XP_001881771.1								Agaricales
ctg01_AA_00022	ctg06_AA_00251ctg11-2_AA_00820											F.velutipes
ctg01_AA_00023	ctg06_AA_00249ctg06_AA_00250											F.velutipes
ctg01_AA_00024	ctg06_AA_00640ctg13_AA_00080											F.velutipes
ctg01_AA_00025												F.velutipes
ctg01_AA_00026	ctg02_AA_00084											F.velutipes
ctg01_AA_00027												F.velutipes
ctg01_AA_00028												F.velutipes
ctg01_AA_00029	ctg01_AA_00031ctg01_AA_00049ctg01_AA_00052ctg01_AA_00053ctg01_AA_00056ctg01_AA_00068ctg01_AA_00072ctg01_AA_00077ctg01_AA_00078ctg01_AA_00079ctg01_AA_00082ctg01_AA_00084ctg01_AA_00087ctg01_AA_00093ctg01_AA_00097ctg01_AA_00099ctg01_AA_00132ctg01_AA_00433ctg01_AA_00509ctg05_AA_01167ctg05_AA_01207ctg05_AA_01819ctg05_AA_01823ctg13_AA_00008ctg13_AA_00030ctg13_AA_00035ctg13_AA_00049ctg13_AA_01042ctg26_A…											F.velutipes
ctg01_AA_00030	ctg01_AA_00032ctg01_AA_00037ctg01_AA_00038ctg01_AA_00043ctg01_AA_00050ctg01_AA_00051ctg01_AA_00055ctg01_AA_00091ctg01_AA_00503ctg01_AA_00520ctg01_AA_00559ctg01_AA_00560ctg01_AA_00593ctg01_AA_00596ctg02_AA_00065ctg03_AA_01311ctg05_AA_00334ctg13_AA_00009											F.velutipes
ctg01_AA_00031	ctg01_AA_00032ctg01_AA_00037ctg01_AA_00038ctg01_AA_00043ctg01_AA_00049ctg01_AA_00050ctg01_AA_00051ctg01_AA_00053ctg01_AA_00054ctg01_AA_00055ctg01_AA_00056ctg01_AA_00068ctg01_AA_00069ctg01_AA_00072ctg01_AA_00077ctg01_AA_00078ctg01_AA_00079ctg01_AA_00082ctg01_AA_00084ctg01_AA_00087ctg01_AA_00091ctg01_AA_00093ctg01_AA_00097ctg01_AA_00099ctg01_AA_00433ctg01_AA_00503ctg01_AA_00509ctg01_AA_00520ctg01_A…											F.velutipes
ctg01_AA_00032	ctg01_AA_00037ctg01_AA_00038ctg01_AA_00043ctg01_AA_00046ctg01_AA_00050ctg01_AA_00051ctg01_AA_00055ctg01_AA_00069ctg01_AA_00087ctg01_AA_00091ctg01_AA_00503ctg01_AA_00520ctg01_AA_00559ctg01_AA_00560ctg01_AA_00593ctg01_AA_00596ctg01_AA_00603ctg02_AA_00065ctg03_AA_01300ctg03_AA_01311ctg05_AA_00334ctg06_AA_00037ctg13_AA_00009ctg01_AA_00030ctg01_AA_00031											F.velutipes
ctg01_AA_00033												F.velutipes
ctg01_AA_00034												F.velutipes
ctg01_AA_00035												F.velutipes
ctg01_AA_00036	ctg01_AA_00052ctg05_AA_01531ctg06_AA_00386ctg11-1_AA_00450ctg11-2_AA_00789ctg13_AA_01032ctg13_AA_01037ctg13_AA_01039ctg29_AA_00145ctg29_AA_00150ctg29_AA_00165ctg29_AA_00462ctg29_AA_00477ctg29_AA_00478ctg29_AA_00495ctg29_AA_00504ctg29_AA_00714ctg29_AA_00726ctg01_AA_00012											F.velutipes
ctg01_AA_00037	ctg01_AA_00038ctg01_AA_00043ctg01_AA_00046ctg01_AA_00050ctg01_AA_00051ctg01_AA_00055ctg01_AA_00069ctg01_AA_00087ctg01_AA_00091ctg01_AA_00503ctg01_AA_00520ctg01_AA_00559ctg01_AA_00593ctg01_AA_00596ctg01_AA_00603ctg05_AA_00334ctg06_AA_00037ctg13_AA_00009ctg01_AA_00030ctg01_AA_00031ctg01_AA_00032											F.velutipes
ctg01_AA_00038	ctg01_AA_00043ctg01_AA_00050ctg01_AA_00051ctg01_AA_00055ctg01_AA_00087ctg01_AA_00091ctg01_AA_00503ctg01_AA_00520ctg01_AA_00559ctg01_AA_00593ctg01_AA_00596ctg02_AA_00065ctg05_AA_00334ctg13_AA_00009ctg01_AA_00030ctg01_AA_00031ctg01_AA_00032ctg01_AA_00037											F.velutipes
ctg01_AA_00039												F.velutipes
ctg01_AA_00040												F.velutipes
ctg01_AA_00041												F.velutipes
ctg01_AA_00042		XP_003031528.1	XP_001838046.2	XP_001885206.1								Agaricales
ctg01_AA_00043	ctg01_AA_00050ctg01_AA_00051ctg01_AA_00055ctg01_AA_00069ctg01_AA_00087ctg01_AA_00091ctg01_AA_00503ctg01_AA_00520ctg01_AA_00559ctg01_AA_00593ctg01_AA_00596ctg02_AA_00065ctg03_AA_01300ctg03_AA_01311ctg05_AA_00334ctg06_AA_00037ctg13_AA_00009ctg01_AA_00030ctg01_AA_00031ctg01_AA_00032ctg01_AA_00037ctg01_AA_00038					XP_002471571.1						Agaricomycetes
ctg01_AA_00044	ctg01_AA_00100											F.velutipes
ctg01_AA_00045												F.velutipes
ctg01_AA_00046	ctg01_AA_00051ctg01_AA_00559ctg01_AA_00593ctg13_AA_00009ctg01_AA_00032ctg01_AA_00037											F.velutipes
ctg01_AA_00047												F.velutipes
ctg01_AA_00048												F.velutipes
ctg01_AA_00049	ctg01_AA_00052ctg01_AA_00053ctg01_AA_00056ctg01_AA_00068ctg01_AA_00072ctg01_AA_00077ctg01_AA_00078ctg01_AA_00079ctg01_AA_00082ctg01_AA_00084ctg01_AA_00087ctg01_AA_00093ctg01_AA_00097ctg01_AA_00099ctg01_AA_00433ctg01_AA_00509ctg05_AA_01167ctg05_AA_01207ctg05_AA_01819ctg05_AA_01823ctg13_AA_00008ctg13_AA_00049ctg13_AA_01042ctg26_AA_00075ctg26_AA_00089ctg26_AA_00092ctg01_AA_00010ctg01_AA_00020ctg01_A…											F.velutipes
ctg01_AA_00050	ctg01_AA_00051ctg01_AA_00055ctg01_AA_00069ctg01_AA_00087ctg01_AA_00091ctg01_AA_00503ctg01_AA_00520ctg01_AA_00559ctg01_AA_00560ctg01_AA_00593ctg01_AA_00596ctg01_AA_00603ctg02_AA_00065ctg03_AA_01300ctg03_AA_01311ctg05_AA_00334ctg06_AA_00037ctg13_AA_00009ctg01_AA_00030ctg01_AA_00031ctg01_AA_00032ctg01_AA_00037ctg01_AA_00038ctg01_AA_00043											F.velutipes
ctg01_AA_00051	ctg01_AA_00055ctg01_AA_00069ctg01_AA_00087ctg01_AA_00091ctg01_AA_00503ctg01_AA_00520ctg01_AA_00559ctg01_AA_00593ctg01_AA_00596ctg01_AA_00603ctg02_AA_00065ctg03_AA_01300ctg03_AA_01311ctg05_AA_00334ctg06_AA_00037ctg13_AA_00009ctg01_AA_00030ctg01_AA_00031ctg01_AA_00032ctg01_AA_00037ctg01_AA_00038ctg01_AA_00043ctg01_AA_00046ctg01_AA_00050											F.velutipes
ctg01_AA_00052	ctg01_AA_00053ctg01_AA_00056ctg01_AA_00068ctg01_AA_00072ctg01_AA_00077ctg01_AA_00078ctg01_AA_00079ctg01_AA_00082ctg01_AA_00084ctg01_AA_00087ctg01_AA_00093ctg01_AA_00097ctg01_AA_00099ctg01_AA_00132ctg01_AA_00433ctg01_AA_00509ctg05_AA_01167ctg05_AA_01207ctg05_AA_01531ctg05_AA_01819ctg05_AA_01823ctg06_AA_00370ctg11-1_AA_00736ctg11-2_AA_00787ctg13_AA_00008ctg13_AA_00024ctg13_AA_00035ctg13_AA_00040ctg…											F.velutipes
ctg01_AA_00053	ctg01_AA_00056ctg01_AA_00072ctg01_AA_00077ctg01_AA_00078ctg01_AA_00084ctg01_AA_00087ctg01_AA_00093ctg01_AA_00097ctg01_AA_00099ctg05_AA_01167ctg05_AA_01207ctg05_AA_01819ctg05_AA_01823ctg01_AA_00010ctg01_AA_00020ctg01_AA_00029ctg01_AA_00031ctg01_AA_00049ctg01_AA_00052											F.velutipes
ctg01_AA_00054	ctg01_AA_00031											F.velutipes
ctg01_AA_00055	ctg01_AA_00087ctg01_AA_00091ctg01_AA_00503ctg01_AA_00520ctg01_AA_00559ctg01_AA_00560ctg01_AA_00593ctg01_AA_00596ctg01_AA_00603ctg02_AA_00065ctg03_AA_01300ctg03_AA_01311ctg05_AA_00334ctg06_AA_00037ctg13_AA_00009ctg01_AA_00030ctg01_AA_00031ctg01_AA_00032ctg01_AA_00037ctg01_AA_00038ctg01_AA_00043ctg01_AA_00050ctg01_AA_00051											F.velutipes
ctg01_AA_00056	ctg01_AA_00068ctg01_AA_00072ctg01_AA_00077ctg01_AA_00078ctg01_AA_00079ctg01_AA_00082ctg01_AA_00084ctg01_AA_00087ctg01_AA_00093ctg01_AA_00097ctg01_AA_00099ctg01_AA_00132ctg01_AA_00433ctg01_AA_00509ctg05_AA_01167ctg05_AA_01207ctg05_AA_01819ctg05_AA_01823ctg11-1_AA_01366ctg13_AA_00008ctg13_AA_00024ctg13_AA_00035ctg13_AA_00040ctg13_AA_00044ctg13_AA_00045ctg13_AA_00049ctg13_AA_01042ctg26_AA_00061ctg26…											F.velutipes
ctg01_AA_00057		XP_003036558.1	XP_001834467.1	XP_001886316.1	Pha_67273		XP_571760.1	XP_759870.1	NP_009824.2	XP_658769.1	XP_957773.2	Dikarya
ctg01_AA_00058												F.velutipes
ctg01_AA_00059	ctg01_AA_00503											F.velutipes
ctg01_AA_00060	ctg01_AA_00067											F.velutipes
ctg01_AA_00061												F.velutipes
ctg01_AA_00062		XP_003033077.1	XP_001840237.2	XP_001885951.1						XP_681736.1	XP_958937.1	Dikarya
ctg01_AA_00063		XP_003030488.1	XP_001833093.1 XP_001834494.1	XP_001886253.1	Pha_72073 Pha_25474	XP_002475504.1	XP_571287.1					Basidiomycota
ctg01_AA_00064		XP_003030487.1	XP_001834493.2	XP_001886252.1	Pha_69153 Pha_25409	XP_002471242.1		XP_761052.1	NP_013938.1	XP_658452.1	XP_959009.2	Dikarya
ctg01_AA_00065	ctg01_AA_00066ctg05_AA_00478ctg13_AA_01011ctg13_AA_01014ctg33_AA_00035ctg33_AA_00047ctg33_AA_00067											F.velutipes
ctg01_AA_00066	ctg05_AA_00478ctg13_AA_01011ctg13_AA_01014ctg33_AA_00035ctg33_AA_00047ctg33_AA_00067ctg01_AA_00065											F.velutipes
ctg01_AA_00067	ctg01_AA_00060											F.velutipes
ctg01_AA_00068	ctg01_AA_00072ctg01_AA_00077ctg01_AA_00079ctg01_AA_00082ctg01_AA_00084ctg01_AA_00087ctg01_AA_00093ctg01_AA_00097ctg01_AA_00099ctg05_AA_01167ctg05_AA_01207ctg05_AA_01819ctg05_AA_01823ctg13_AA_00049ctg13_AA_01042ctg01_AA_00010ctg01_AA_00029ctg01_AA_00031ctg01_AA_00049ctg01_AA_00052ctg01_AA_00056											F.velutipes
ctg01_AA_00069	ctg01_AA_00087ctg01_AA_00091ctg01_AA_00503ctg01_AA_00520ctg01_AA_00559ctg01_AA_00593ctg01_AA_00596ctg02_AA_00065ctg06_AA_00037ctg13_AA_00009ctg01_AA_00031ctg01_AA_00032ctg01_AA_00037ctg01_AA_00043ctg01_AA_00050ctg01_AA_00051											F.velutipes
ctg01_AA_00070	ctg11-1_AA_01371ctg13_AA_00371											F.velutipes
ctg01_AA_00071												F.velutipes
ctg01_AA_00072	ctg01_AA_00077ctg01_AA_00078ctg01_AA_00079ctg01_AA_00082ctg01_AA_00084ctg01_AA_00087ctg01_AA_00093ctg01_AA_00097ctg01_AA_00099ctg01_AA_00132ctg01_AA_00433ctg01_AA_00509ctg05_AA_01167ctg05_AA_01207ctg05_AA_01819ctg05_AA_01823ctg13_AA_00008ctg13_AA_00024ctg13_AA_00030ctg13_AA_00035ctg13_AA_00040ctg13_AA_00044ctg13_AA_00045ctg13_AA_00049ctg13_AA_01042ctg26_AA_00061ctg26_AA_00075ctg26_AA_00089ctg26_A…											F.velutipes
ctg01_AA_00073	ctg01_AA_00121											F.velutipes
ctg01_AA_00074												F.velutipes
ctg01_AA_00075												F.velutipes
ctg01_AA_00076	ctg01_AA_00080ctg01_AA_00083ctg01_AA_00085ctg01_AA_00089ctg01_AA_00092ctg01_AA_00098ctg06_AA_00077ctg06_AA_00078ctg06_AA_00081ctg06_AA_00083ctg06_AA_00101ctg06_AA_00117ctg06_AA_00120ctg26_AA_00169											F.velutipes
ctg01_AA_00077	ctg01_AA_00078ctg01_AA_00079ctg01_AA_00082ctg01_AA_00084ctg01_AA_00087ctg01_AA_00093ctg01_AA_00097ctg01_AA_00099ctg01_AA_00132ctg01_AA_00433ctg01_AA_00509ctg05_AA_01167ctg05_AA_01207ctg05_AA_01819ctg05_AA_01823ctg13_AA_00008ctg13_AA_00024ctg13_AA_00030ctg13_AA_00035ctg13_AA_00040ctg13_AA_00044ctg13_AA_00045ctg13_AA_00049ctg13_AA_01042ctg26_AA_00527ctg01_AA_00010ctg01_AA_00020ctg01_AA_00029ctg01_A…											F.velutipes
ctg01_AA_00078	ctg01_AA_00084ctg01_AA_00087ctg01_AA_00093ctg01_AA_00097ctg01_AA_00099ctg01_AA_00132ctg01_AA_00433ctg05_AA_01167ctg05_AA_01207ctg05_AA_01819ctg05_AA_01823ctg13_AA_00008ctg13_AA_00024ctg13_AA_00035ctg13_AA_00040ctg13_AA_00044ctg13_AA_00045ctg26_AA_00527ctg01_AA_00010ctg01_AA_00020ctg01_AA_00029ctg01_AA_00031ctg01_AA_00049ctg01_AA_00052ctg01_AA_00053ctg01_AA_00056ctg01_AA_00072ctg01_AA_00077											F.velutipes
ctg01_AA_00079	ctg01_AA_00082ctg01_AA_00084ctg01_AA_00087ctg01_AA_00093ctg01_AA_00097ctg01_AA_00099ctg05_AA_01167ctg05_AA_01207ctg01_AA_00010ctg01_AA_00029ctg01_AA_00031ctg01_AA_00049ctg01_AA_00052ctg01_AA_00056ctg01_AA_00068ctg01_AA_00072ctg01_AA_00077											F.velutipes
ctg01_AA_00080	ctg01_AA_00083ctg01_AA_00085ctg01_AA_00089ctg01_AA_00092ctg01_AA_00098ctg01_AA_00076											F.velutipes
ctg01_AA_00081	ctg01_AA_00678ctg01_AA_00681ctg11-1_AA_00598ctg11-1_AA_00599ctg11-1_AA_00846ctg11-1_AA_00862ctg29_AA_00239ctg29_AA_00529ctg29_AA_00696											F.velutipes
ctg01_AA_00082	ctg01_AA_00084ctg01_AA_00087ctg01_AA_00093ctg01_AA_00097ctg01_AA_00099ctg01_AA_00433ctg05_AA_01167ctg05_AA_01207ctg05_AA_01819ctg05_AA_01823ctg13_AA_00044ctg13_AA_00049ctg13_AA_01042ctg01_AA_00010ctg01_AA_00029ctg01_AA_00031ctg01_AA_00049ctg01_AA_00052ctg01_AA_00056ctg01_AA_00068ctg01_AA_00072ctg01_AA_00077ctg01_AA_00079											F.velutipes
ctg01_AA_00083	ctg01_AA_00085ctg01_AA_00089ctg01_AA_00092ctg01_AA_00098ctg06_AA_00095ctg11-1_AA_01157ctg29_AA_00739ctg29_AA_00755ctg29_AA_00766ctg01_AA_00076ctg01_AA_00080											F.velutipes
ctg01_AA_00084	ctg01_AA_00087ctg01_AA_00093ctg01_AA_00097ctg01_AA_00099ctg01_AA_00132ctg01_AA_00433ctg01_AA_00509ctg05_AA_01167ctg05_AA_01207ctg05_AA_01819ctg05_AA_01823ctg13_AA_00008ctg13_AA_00024ctg13_AA_00035ctg13_AA_00040ctg13_AA_00044ctg13_AA_00045ctg13_AA_00049ctg13_AA_01042ctg26_AA_00061ctg26_AA_00074ctg26_AA_00075ctg26_AA_00089ctg26_AA_00092ctg26_AA_00527ctg01_AA_00010ctg01_AA_00020ctg01_AA_00029ctg01_A…											F.velutipes
ctg01_AA_00085	ctg01_AA_00089ctg01_AA_00092ctg01_AA_00098ctg02_AA_00373ctg11-2_AA_01657ctg01_AA_00076ctg01_AA_00080ctg01_AA_00083											F.velutipes
ctg01_AA_00086												F.velutipes
ctg01_AA_00087	ctg01_AA_00091ctg01_AA_00093ctg01_AA_00097ctg01_AA_00099ctg01_AA_00132ctg01_AA_00503ctg01_AA_00509ctg01_AA_00520ctg01_AA_00559ctg01_AA_00560ctg01_AA_00593ctg01_AA_00596ctg02_AA_00065ctg03_AA_01311ctg05_AA_00334ctg05_AA_01167ctg05_AA_01207ctg05_AA_01819ctg05_AA_01823ctg06_AA_00037ctg13_AA_00008ctg13_AA_00009ctg13_AA_00024ctg13_AA_00035ctg13_AA_00040ctg13_AA_00045ctg13_AA_00049ctg13_AA_01042ctg01_A…											F.velutipes
ctg01_AA_00088												F.velutipes
ctg01_AA_00089	ctg01_AA_00092ctg01_AA_00098ctg06_AA_00095ctg29_AA_00739ctg29_AA_00766ctg01_AA_00076ctg01_AA_00080ctg01_AA_00083ctg01_AA_00085											F.velutipes
ctg01_AA_00090												F.velutipes
ctg01_AA_00091	ctg01_AA_00503ctg01_AA_00520ctg01_AA_00559ctg01_AA_00593ctg01_AA_00596ctg02_AA_00065ctg03_AA_01300ctg03_AA_01311ctg05_AA_00334ctg06_AA_00037ctg13_AA_00009ctg01_AA_00030ctg01_AA_00031ctg01_AA_00032ctg01_AA_00037ctg01_AA_00038ctg01_AA_00043ctg01_AA_00050ctg01_AA_00051ctg01_AA_00055ctg01_AA_00069ctg01_AA_00087											F.velutipes
ctg01_AA_00092	ctg01_AA_00098ctg05_AA_01023ctg26_AA_00526ctg29_AA_00659ctg29_AA_00773ctg01_AA_00076ctg01_AA_00080ctg01_AA_00083ctg01_AA_00085ctg01_AA_00089											F.velutipes
ctg01_AA_00093	ctg01_AA_00097ctg01_AA_00099ctg01_AA_00132ctg01_AA_00433ctg01_AA_00509ctg05_AA_01167ctg05_AA_01207ctg05_AA_01819ctg05_AA_01823ctg13_AA_00008ctg13_AA_00023ctg13_AA_00024ctg13_AA_00035ctg13_AA_00040ctg13_AA_00044ctg13_AA_00045ctg13_AA_00049ctg13_AA_01042ctg26_AA_00061ctg26_AA_00075ctg26_AA_00089ctg26_AA_00092ctg26_AA_00527ctg01_AA_00010ctg01_AA_00020ctg01_AA_00029ctg01_AA_00031ctg01_AA_00049ctg01_A…											F.velutipes
ctg01_AA_00094												F.velutipes
ctg01_AA_00095												F.velutipes
ctg01_AA_00096	ctg06_AA_00750ctg11-2_AA_01184ctg11-2_AA_01210											F.velutipes
ctg01_AA_00097	ctg01_AA_00099ctg01_AA_00132ctg01_AA_00433ctg01_AA_00509ctg05_AA_01167ctg05_AA_01207ctg05_AA_01819ctg05_AA_01823ctg13_AA_00008ctg13_AA_00024ctg13_AA_00030ctg13_AA_00035ctg13_AA_00040ctg13_AA_00044ctg13_AA_00045ctg13_AA_00049ctg13_AA_01042ctg26_AA_00061ctg26_AA_00075ctg26_AA_00089ctg26_AA_00092ctg26_AA_00527ctg01_AA_00010ctg01_AA_00020ctg01_AA_00029ctg01_AA_00031ctg01_AA_00049ctg01_AA_00052ctg01_A…											F.velutipes
ctg01_AA_00098	ctg05_AA_00112ctg06_AA_00095ctg11-1_AA_01157ctg26_AA_00158ctg26_AA_00526ctg29_AA_00659ctg29_AA_00739ctg29_AA_00746ctg29_AA_00766ctg29_AA_00767ctg29_AA_00773ctg01_AA_00076ctg01_AA_00080ctg01_AA_00083ctg01_AA_00085ctg01_AA_00089ctg01_AA_00092											F.velutipes
ctg01_AA_00099	ctg01_AA_00132ctg01_AA_00433ctg01_AA_00509ctg05_AA_01167ctg05_AA_01207ctg05_AA_01819ctg05_AA_01823ctg13_AA_00008ctg13_AA_00024ctg13_AA_00030ctg13_AA_00035ctg13_AA_00040ctg13_AA_00044ctg13_AA_00045ctg13_AA_00049ctg13_AA_01042ctg26_AA_00061ctg26_AA_00075ctg26_AA_00089ctg26_AA_00527ctg01_AA_00010ctg01_AA_00020ctg01_AA_00029ctg01_AA_00031ctg01_AA_00049ctg01_AA_00052ctg01_AA_00053ctg01_AA_00056ctg01_A…											F.velutipes
ctg01_AA_00100	ctg01_AA_00044											F.velutipes
ctg01_AA_00101		XP_003028792.1 XP_003028787.1	XP_001840326.1	XP_001882664.1 XP_001882629.1 XP_001882605.1								Agaricales
ctg01_AA_00102	ctg01_AA_00112											F.velutipes
ctg01_AA_00103		XP_003030808.1	XP_001838166.1	XP_001887187.1		XP_002475127.1						Agaricomycetes
ctg01_AA_00104												F.velutipes
ctg01_AA_00105												F.velutipes
ctg01_AA_00106		XP_003033547.1	XP_001840656.2	XP_001884957.1		XP_002470361.1						Agaricomycetes
ctg01_AA_00107		XP_003034422.1 XP_003026089.1			Pha_75768	XP_002471798.1 XP_002473237.1					XP_957112.1	Dikarya
ctg01_AA_00108												F.velutipes
ctg01_AA_00109	ctg01_AA_00110ctg01_AA_00111ctg01_AA_00117ctg01_AA_00119ctg01_AA_00123ctg01_AA_00125ctg01_AA_00126ctg01_AA_00127ctg01_AA_00426ctg01_AA_00427ctg01_AA_00429ctg01_AA_00430ctg01_AA_00431ctg01_AA_00434ctg01_AA_00461ctg01_AA_00465ctg01_AA_00470ctg01_AA_00473ctg01_AA_00502ctg01_AA_00504ctg01_AA_00527ctg01_AA_00530ctg01_AA_00542ctg01_AA_00546ctg01_AA_00547											F.velutipes
ctg01_AA_00110	ctg01_AA_00111ctg01_AA_00117ctg01_AA_00119ctg01_AA_00123ctg01_AA_00125ctg01_AA_00126ctg01_AA_00127ctg01_AA_00426ctg01_AA_00427ctg01_AA_00430ctg01_AA_00431ctg01_AA_00434ctg01_AA_00461ctg01_AA_00465ctg01_AA_00470ctg01_AA_00473ctg01_AA_00478ctg01_AA_00502ctg01_AA_00504ctg01_AA_00527ctg01_AA_00530ctg01_AA_00542ctg01_AA_00546ctg01_AA_00547ctg13_AA_00233ctg01_AA_00109											F.velutipes
ctg01_AA_00111	ctg01_AA_00115ctg01_AA_00117ctg01_AA_00119ctg01_AA_00123ctg01_AA_00125ctg01_AA_00126ctg01_AA_00127ctg01_AA_00426ctg01_AA_00427ctg01_AA_00429ctg01_AA_00430ctg01_AA_00431ctg01_AA_00434ctg01_AA_00461ctg01_AA_00465ctg01_AA_00470ctg01_AA_00473ctg01_AA_00478ctg01_AA_00502ctg01_AA_00504ctg01_AA_00527ctg01_AA_00530ctg01_AA_00542ctg01_AA_00546ctg01_AA_00547ctg01_AA_00109ctg01_AA_00110											F.velutipes
ctg01_AA_00112	ctg01_AA_00102											F.velutipes
ctg01_AA_00113												F.velutipes
ctg01_AA_00114												F.velutipes
ctg01_AA_00115	ctg01_AA_00429ctg01_AA_00542ctg01_AA_00111											F.velutipes
ctg01_AA_00116	ctg01_AA_00182ctg01_AA_00202ctg01_AA_00372ctg01_AA_00674ctg05_AA_01777ctg06_AA_00092ctg06_AA_00323ctg06_AA_00324ctg06_AA_00487ctg11-1_AA_00979ctg11-1_AA_00982ctg11-1_AA_00984ctg11-1_AA_01378ctg11-1_AA_01386ctg11-2_AA_00982ctg11-2_AA_01218ctg13_AA_00153ctg13_AA_00737ctg29_AA_00171ctg29_AA_00177ctg29_AA_00178ctg29_AA_00203ctg29_AA_00602ctg29_AA_00650ctg29_AA_00741ctg29_AA_00795ctg29_AA_00835ctg29_A…											F.velutipes
ctg01_AA_00117	ctg01_AA_00119ctg01_AA_00123ctg01_AA_00125ctg01_AA_00126ctg01_AA_00127ctg01_AA_00426ctg01_AA_00427ctg01_AA_00429ctg01_AA_00430ctg01_AA_00431ctg01_AA_00434ctg01_AA_00461ctg01_AA_00465ctg01_AA_00470ctg01_AA_00473ctg01_AA_00478ctg01_AA_00502ctg01_AA_00504ctg01_AA_00527ctg01_AA_00530ctg01_AA_00542ctg01_AA_00546ctg01_AA_00547ctg13_AA_00233ctg01_AA_00109ctg01_AA_00110ctg01_AA_00111											F.velutipes
ctg01_AA_00118		XP_003033706.1	XP_002910645.1	XP_001875720.1		XP_002472448.1	XP_570979.1					Basidiomycota
ctg01_AA_00119	ctg01_AA_00123ctg01_AA_00125ctg01_AA_00126ctg01_AA_00127ctg01_AA_00426ctg01_AA_00427ctg01_AA_00429ctg01_AA_00430ctg01_AA_00431ctg01_AA_00434ctg01_AA_00461ctg01_AA_00465ctg01_AA_00470ctg01_AA_00473ctg01_AA_00478ctg01_AA_00502ctg01_AA_00504ctg01_AA_00527ctg01_AA_00530ctg01_AA_00542ctg01_AA_00546ctg01_AA_00547ctg13_AA_00233ctg01_AA_00109ctg01_AA_00110ctg01_AA_00111ctg01_AA_00117											F.velutipes
ctg01_AA_00120												F.velutipes
ctg01_AA_00121	ctg01_AA_00073											F.velutipes
ctg01_AA_00122												F.velutipes
ctg01_AA_00123	ctg01_AA_00125ctg01_AA_00126ctg01_AA_00127ctg01_AA_00426ctg01_AA_00427ctg01_AA_00429ctg01_AA_00430ctg01_AA_00431ctg01_AA_00434ctg01_AA_00461ctg01_AA_00465ctg01_AA_00470ctg01_AA_00473ctg01_AA_00478ctg01_AA_00502ctg01_AA_00504ctg01_AA_00527ctg01_AA_00530ctg01_AA_00542ctg01_AA_00546ctg01_AA_00547ctg13_AA_00233ctg01_AA_00109ctg01_AA_00110ctg01_AA_00111ctg01_AA_00117ctg01_AA_00119											F.velutipes
ctg01_AA_00124												F.velutipes
ctg01_AA_00125	ctg01_AA_00127ctg01_AA_00426ctg01_AA_00427ctg01_AA_00430ctg01_AA_00431ctg01_AA_00434ctg01_AA_00461ctg01_AA_00465ctg01_AA_00470ctg01_AA_00473ctg01_AA_00502ctg01_AA_00504ctg01_AA_00527ctg01_AA_00546ctg01_AA_00547ctg01_AA_00109ctg01_AA_00110ctg01_AA_00111ctg01_AA_00117ctg01_AA_00119ctg01_AA_00123											F.velutipes
ctg01_AA_00126	ctg01_AA_00127ctg01_AA_00427ctg01_AA_00430ctg01_AA_00431ctg01_AA_00434ctg01_AA_00465ctg01_AA_00504ctg01_AA_00527ctg01_AA_00530ctg01_AA_00546ctg01_AA_00109ctg01_AA_00110ctg01_AA_00111ctg01_AA_00117ctg01_AA_00119ctg01_AA_00123											F.velutipes
ctg01_AA_00127	ctg01_AA_00426ctg01_AA_00427ctg01_AA_00430ctg01_AA_00431ctg01_AA_00434ctg01_AA_00461ctg01_AA_00465ctg01_AA_00470ctg01_AA_00473ctg01_AA_00478ctg01_AA_00502ctg01_AA_00504ctg01_AA_00527ctg01_AA_00530ctg01_AA_00542ctg01_AA_00546ctg01_AA_00547ctg13_AA_00233ctg01_AA_00109ctg01_AA_00110ctg01_AA_00111ctg01_AA_00117ctg01_AA_00119ctg01_AA_00123ctg01_AA_00125ctg01_AA_00126											F.velutipes
ctg01_AA_00128	ctg11-1_AA_01176											F.velutipes
ctg01_AA_00129	ctg01_AA_00131											F.velutipes
ctg01_AA_00130	ctg01_AA_00159											F.velutipes
ctg01_AA_00131	ctg01_AA_00129											F.velutipes
ctg01_AA_00132	ctg01_AA_00433ctg01_AA_00509ctg05_AA_01167ctg05_AA_01207ctg05_AA_01819ctg05_AA_01823ctg11-1_AA_01366ctg13_AA_00008ctg13_AA_00023ctg13_AA_00024ctg13_AA_00030ctg13_AA_00031ctg13_AA_00035ctg13_AA_00038ctg13_AA_00040ctg13_AA_00044ctg13_AA_00045ctg13_AA_00049ctg13_AA_01042ctg26_AA_00061ctg26_AA_00074ctg26_AA_00075ctg26_AA_00089ctg26_AA_00092ctg26_AA_00189ctg26_AA_00527ctg01_AA_00020ctg01_AA_00029ctg01…											F.velutipes
ctg01_AA_00133												F.velutipes
ctg01_AA_00134	ctg01_AA_00135ctg01_AA_00142ctg11-1_AA_01023ctg11-1_AA_01029ctg26_AA_00164											F.velutipes
ctg01_AA_00135	ctg01_AA_00142ctg11-1_AA_01023ctg01_AA_00134											F.velutipes
ctg01_AA_00136	ctg01_AA_00141											F.velutipes
ctg01_AA_00137												F.velutipes
ctg01_AA_00138	ctg01_AA_00143ctg01_AA_00150											F.velutipes
ctg01_AA_00139												F.velutipes
ctg01_AA_00140	ctg11-2_AA_00677	XP_003034318.1		XP_001889113.1	Pha_69866 Pha_78896							Agaricomycetes
ctg01_AA_00141	ctg01_AA_00136											F.velutipes
ctg01_AA_00142	ctg11-1_AA_01023ctg11-1_AA_01029ctg26_AA_00164ctg01_AA_00134ctg01_AA_00135											F.velutipes
ctg01_AA_00143	ctg01_AA_00150ctg01_AA_00138											F.velutipes
ctg01_AA_00144		XP_003031320.1	XP_001840227.2	XP_001885894.1	Pha_66302							Agaricomycetes
ctg01_AA_00145												F.velutipes
ctg01_AA_00146												F.velutipes
ctg01_AA_00147		XP_003026212.1										Agaricales
ctg01_AA_00148												F.velutipes
ctg01_AA_00149												F.velutipes
ctg01_AA_00150	ctg01_AA_00138ctg01_AA_00143											F.velutipes
ctg01_AA_00151												F.velutipes
ctg01_AA_00152		XP_003031302.1	XP_001838352.2	XP_001889632.1	Pha_100350	XP_002472978.1 XP_002474492.1	XP_571576.1	XP_761989.1				Basidiomycota
ctg01_AA_00153										XP_660378.1		Ascomycota
ctg01_AA_00154												F.velutipes
ctg01_AA_00155												F.velutipes
ctg01_AA_00156												F.velutipes
ctg01_AA_00157	ctg01_AA_00161											F.velutipes
ctg01_AA_00158												F.velutipes
ctg01_AA_00159	ctg01_AA_00130											F.velutipes
ctg01_AA_00160				XP_001884223.1						XP_663796.1	XP_961825.1	Dikarya
ctg01_AA_00161	ctg01_AA_00157	XP_003036168.1										Agaricales
ctg01_AA_00162	ctg01_AA_00728ctg06_AA_00426ctg06_AA_00433ctg13_AA_00203											F.velutipes
ctg01_AA_00163		XP_003032250.1	XP_001838304.1	XP_001885842.1	Pha_70174		XP_570075.1	XP_761947.1	NP_012651.1		XP_961364.2	Dikarya
ctg01_AA_00164	ctg05_AA_00429ctg11-2_AA_00824ctg11-2_AA_01686		XP_002911047.1	XP_001879382.1								Agaricales
ctg01_AA_00165	ctg11-1_AA_00699											F.velutipes
ctg01_AA_00166		XP_003029848.1 XP_003028802.1 XP_003029972.1	XP_001835122.1	XP_001882727.1	Pha_100536	XP_002469779.1						Agaricomycetes
ctg01_AA_00167		XP_003028278.1	XP_001838306.2	XP_001885913.1	Pha_66316		XP_571713.1		NP_009892.1	XP_680706.1	XP_965051.2	Dikarya
ctg01_AA_00168	ctg01_AA_00176											F.velutipes
ctg01_AA_00169	ctg03_AA_00677	XP_003033819.1 XP_003031300.1	XP_001837864.2 XP_001838344.1	Lacc XP_001878739.1 Lacc XP_001889672.1	Pha_68037Pha_96708Pha_70167	XP_002474503.1	XP_567314.1 XP_567302.1			XP_659123.1	XP_960365.2	Dikarya
ctg01_AA_00170		XP_003036847.1	XP_001838338.1		Pha_22818		XP_566721.1	XP_759748.1	NP_660100.1	XP_659589.1	XP_963220.1	Dikarya
ctg01_AA_00171												F.velutipes
ctg01_AA_00172			XP_001840205.2	XP_001886863.1								Agaricales
ctg01_AA_00173		XP_003027248.1	XP_001828187.2	XP_001881180.1	Pha_75634		XP_567598.1			XP_660663.1	XP_959896.1	Dikarya
ctg01_AA_00174		XP_003031303.1	XP_001840202.1	XP_001886862.1	Pha_69023		XP_571548.1	XP_762035.1	NP_011472.1	XP_662465.1	XP_965694.1	Dikarya
ctg01_AA_00175												F.velutipes
ctg01_AA_00176	ctg01_AA_00168		XP_001828219.1	XP_001887743.1 XP_001887739.1								Agaricales
ctg01_AA_00177												F.velutipes
ctg01_AA_00178		XP_003030884.1	XP_002910404.1	XP_001880016.1	Pha_69657	XP_002472982.1	XP_569009.1	XP_758580.1	NP_009533.1	XP_680694.1	XP_960043.2	Dikarya
ctg01_AA_00179		XP_003031444.1 XP_003038031.1	XP_001837863.1	XP_001878738.1	Pha_69777	XP_002474995.1	XP_569587.1	XP_756430.1	NP_010137.2	XP_681763.1	XP_959834.1	Dikarya
ctg01_AA_00180		XP_003030912.1	XP_001840208.2	XP_001889629.1	Pha_78939	XP_002472979.1		XP_757173.1				Basidiomycota
ctg01_AA_00181												F.velutipes
ctg01_AA_00182	ctg01_AA_00202ctg01_AA_00674ctg05_AA_01131ctg05_AA_01777ctg06_AA_00074ctg06_AA_00091ctg06_AA_00092ctg06_AA_00323ctg06_AA_00324ctg06_AA_00478ctg06_AA_00487ctg11-1_AA_00979ctg11-1_AA_00982ctg11-1_AA_00984ctg11-1_AA_01378ctg11-1_AA_01386ctg11-2_AA_01218ctg13_AA_00153ctg13_AA_00518ctg13_AA_00737ctg29_AA_00171ctg29_AA_00177ctg29_AA_00178ctg29_AA_00203ctg29_AA_00602ctg29_AA_00650ctg29_AA_00701ctg29_AA_…											F.velutipes
ctg01_AA_00183			XP_001838351.1	XP_001886859.1	Pha_78904		XP_569442.1	XP_762011.1	NP_014278.1 NP_011985.1	XP_680956.1	XP_961236.1	Dikarya
ctg01_AA_00184												F.velutipes
ctg01_AA_00185	ctg01_AA_00189											F.velutipes
ctg01_AA_00186												F.velutipes
ctg01_AA_00187												F.velutipes
ctg01_AA_00188												F.velutipes
ctg01_AA_00189	ctg01_AA_00185											F.velutipes
ctg01_AA_00190		XP_003030312.1	XP_001840151.1	XP_001887080.1	Pha_68003		XP_567541.1	XP_761102.1		XP_658300.1	XP_957505.2	Dikarya
ctg01_AA_00191												F.velutipes
ctg01_AA_00192		XP_003030692.1	XP_001839948.1	XP_001885934.1		XP_002469718.1						Agaricomycetes
ctg01_AA_00193	ctg05_AA_00125ctg11-1_AA_01427	XP_003030071.1		XP_001884359.1	Pha_73480						XP_962191.1	Dikarya
ctg01_AA_00194				XP_001885696.1 XP_001890874.1	Pha_65838			XP_760242.1		XP_664048.1		Dikarya
ctg01_AA_00195												F.velutipes
ctg01_AA_00196												F.velutipes
ctg01_AA_00197		XP_003031304.1	XP_001840272.2	XP_001886860.1	Pha_78906	XP_002476960.1	XP_568269.1	XP_762444.1	NP_012730.1	XP_662783.1	XP_960030.1	Dikarya
ctg01_AA_00198												F.velutipes
ctg01_AA_00199												F.velutipes
ctg01_AA_00200												F.velutipes
ctg01_AA_00201												F.velutipes
ctg01_AA_00202	ctg01_AA_00207ctg01_AA_00372ctg01_AA_00674ctg05_AA_01777ctg06_AA_00091ctg06_AA_00092ctg06_AA_00323ctg06_AA_00324ctg06_AA_00478ctg06_AA_00487ctg11-1_AA_00690ctg11-1_AA_00694ctg11-1_AA_00979ctg11-1_AA_00982ctg11-1_AA_00984ctg11-1_AA_01378ctg11-1_AA_01386ctg11-2_AA_00982ctg11-2_AA_01218ctg13_AA_00153ctg13_AA_00518ctg13_AA_00737ctg29_AA_00171ctg29_AA_00177ctg29_AA_00178ctg29_AA_00203ctg29_AA_00602ctg…											F.velutipes
ctg01_AA_00203		XP_003031287.1	XP_001838251.2	XP_001887122.1	Pha_66187	XP_002476429.1	XP_566492.1	XP_759933.1	NP_011641.1	XP_661269.1	XP_964057.1	Dikarya
ctg01_AA_00204		XP_003031296.1	XP_001838252.1	XP_001887178.1	Pha_65691	XP_002474488.1	XP_571852.1	XP_758540.1		XP_681314.1	XP_958148.1	Dikarya
ctg01_AA_00205												F.velutipes
ctg01_AA_00206		XP_003031290.1	XP_001838297.2	XP_001883240.1 XP_001883341.1								Agaricales
ctg01_AA_00207	ctg01_AA_00202			XP_001878893.1	Pha_63153 Pha_68397	XP_002476456.1 XP_002475720.1						Agaricomycetes
ctg01_AA_00208		XP_003031474.1	XP_001829514.1	XP_001873585.1								Agaricales
ctg01_AA_00209												F.velutipes
ctg01_AA_00210												F.velutipes
ctg01_AA_00211												F.velutipes
ctg01_AA_00212												F.velutipes
ctg01_AA_00213												F.velutipes
ctg01_AA_00214												F.velutipes
ctg01_AA_00215												F.velutipes
ctg01_AA_00216												F.velutipes
ctg01_AA_00217												F.velutipes
ctg01_AA_00218												F.velutipes
ctg01_AA_00219	ctg01_AA_00586ctg13_AA_00474	XP_003033315.1 XP_003032911.1XP_003027665.1 XP_003027906.1			Pha_96879Pha_78172Pha_66268Pha_70314Pha_69852Pha_95861	XP_002471784.1						Agaricomycetes
ctg01_AA_00220	ctg03_AA_00120ctg11-1_AA_00661ctg26_AA_00037											F.velutipes
ctg01_AA_00221												F.velutipes
ctg01_AA_00222												F.velutipes
ctg01_AA_00223												F.velutipes
ctg01_AA_00224										XP_660408.1		Ascomycota
ctg01_AA_00225												F.velutipes
ctg01_AA_00226		XP_003030898.1	XP_001838250.1	XP_001887180.1	Pha_23463	XP_002475882.1	XP_570342.1					Basidiomycota
ctg01_AA_00227		XP_003032614.1	XP_001831453.1		Pha_71848		XP_570999.1 XP_569351.1	XP_761817.1		XP_662727.1	XP_956910.1	Dikarya
ctg01_AA_00228		XP_003029256.1	XP_001835507.2	XP_001876799.1	Pha_63651		XP_566984.1	XP_761874.1	NP_015209.1	XP_664623.1	XP_961839.2	Dikarya
ctg01_AA_00229	ctg29_AA_00719											F.velutipes
ctg01_AA_00230												F.velutipes
ctg01_AA_00231												F.velutipes
ctg01_AA_00232												F.velutipes
ctg01_AA_00233		XP_003037451.1		XP_001885940.1	Pha_75577		XP_568566.1	XP_756419.1				Basidiomycota
ctg01_AA_00234												F.velutipes
ctg01_AA_00235												F.velutipes
ctg01_AA_00236				XP_001890400.1								Agaricales
ctg01_AA_00237	ctg01_AA_00241ctg01_AA_00246ctg01_AA_00558ctg33_AA_01174											F.velutipes
ctg01_AA_00238		XP_003031291.1	XP_001838249.1	XP_001887120.1	Pha_78933		XP_567342.1	XP_762245.1				Basidiomycota
ctg01_AA_00239												F.velutipes
ctg01_AA_00240												F.velutipes
ctg01_AA_00241	ctg01_AA_00246ctg01_AA_00558ctg01_AA_00237											F.velutipes
ctg01_AA_00242		XP_003027521.1	XP_001832131.1	XP_001885806.1	Pha_78719		XP_571356.1	XP_756176.1		XP_663589.1	XP_960986.1	Dikarya
ctg01_AA_00243	ctg01_AA_00382ctg01_AA_00604ctg01_AA_00605ctg03_AA_00016ctg06_AA_00758ctg06_AA_00794ctg11-2_AA_01525ctg26_AA_00032											F.velutipes
ctg01_AA_00244	ctg01_AA_00305ctg01_AA_00308ctg06_AA_00302											F.velutipes
ctg01_AA_00245		XP_003032962.1 XP_003031279.1	XP_002911182.1	XP_001876637.1	Pha_72936		XP_567781.1	XP_762551.1	NP_009489.1	XP_661577.1	XP_959621.1	Dikarya
ctg01_AA_00246	ctg01_AA_00558ctg01_AA_00237ctg01_AA_00241											F.velutipes
ctg01_AA_00247		XP_003031400.1 XP_003031259.1	XP_001838294.1	XP_001876145.1	Pha_65690		XP_569526.1	XP_762027.1	NP_011574.1	XP_682176.1 XP_664577.1	XP_962240.1	Dikarya
ctg01_AA_00248		XP_003031261.1	XP_001838292.2	XP_001885889.1	Pha_23452			XP_757903.1		XP_681803.1	XP_965513.2	Dikarya
ctg01_AA_00249												F.velutipes
ctg01_AA_00250												F.velutipes
ctg01_AA_00251	ctg02_AA_00294											F.velutipes
ctg01_AA_00252	ctg11-1_AA_01095ctg33_AA_00624											F.velutipes
ctg01_AA_00253		XP_003036805.1	XP_001837335.2		Pha_72873			XP_757648.1		XP_680576.1	XP_964439.1 XP_960079.1	Dikarya
ctg01_AA_00254	ctg02_AA_00290											F.velutipes
ctg01_AA_00255												F.velutipes
ctg01_AA_00256	ctg01_AA_00262											F.velutipes
ctg01_AA_00257	ctg01_AA_00262ctg01_AA_00264											F.velutipes
ctg01_AA_00258		XP_003034231.1	XP_001840854.1		Pha_67217	XP_002472853.1				XP_663940.1	XP_956092.2	Dikarya
ctg01_AA_00259			XP_001832564.1	XP_001889425.1 XP_001884078.1	Pha_98792					XP_664364.1		Dikarya
ctg01_AA_00260		XP_003031271.1 XP_003032799.1	XP_001831311.2		Pha_96034		XP_570003.1 XP_567184.1	XP_756256.1	NP_116602.1 NP_013641.1	XP_657638.1	XP_961125.2 XP_957477.1	Dikarya
ctg01_AA_00261		XP_003035426.1										Agaricales
ctg01_AA_00262	ctg01_AA_00264ctg01_AA_00268ctg01_AA_00280ctg01_AA_00281ctg01_AA_00289ctg01_AA_00256ctg01_AA_00257											F.velutipes
ctg01_AA_00263												F.velutipes
ctg01_AA_00264	ctg01_AA_00268ctg01_AA_00280ctg01_AA_00281ctg01_AA_00289ctg11-1_AA_00180ctg01_AA_00257ctg01_AA_00262											F.velutipes
ctg01_AA_00265												F.velutipes
ctg01_AA_00266												F.velutipes
ctg01_AA_00267												F.velutipes
ctg01_AA_00268	ctg01_AA_00280ctg01_AA_00281ctg01_AA_00289ctg01_AA_00262ctg01_AA_00264											F.velutipes
ctg01_AA_00269		XP_003030874.1	XP_001829530.2		Pha_71387		XP_570156.1	XP_758623.1	NP_116709.1	XP_658526.1	XP_956178.1	Dikarya
ctg01_AA_00270		XP_003035059.1	XP_001835009.1	XP_001888398.1	Pha_71005	XP_002474913.1	XP_571451.1	XP_758810.1				Basidiomycota
ctg01_AA_00271												F.velutipes
ctg01_AA_00272		XP_003030882.1	XP_001838301.1	XP_001889346.1	Pha_65700	XP_002476959.1		XP_759077.1	NP_010777.1	XP_661544.1	XP_964696.1	Dikarya
ctg01_AA_00273		XP_003030877.1	XP_001838300.1	XP_001881033.1	Pha_23461		XP_571028.1	XP_757053.1	NP_011086.1	XP_663947.1	XP_960662.1 XP_955775.1	Dikarya
ctg01_AA_00274	ctg01_AA_00275											F.velutipes
ctg01_AA_00275	ctg01_AA_00274		XP_001838311.2			XP_002475195.1						Agaricomycetes
ctg01_AA_00276		XP_003031264.1 XP_003038791.1	XP_001840999.1 XP_001836747.1	XP_001875695.1XP_001889505.1XP_001885703.1XP_001882933.1	Pha_63843							Agaricomycetes
ctg01_AA_00277												F.velutipes
ctg01_AA_00278		XP_003030888.1 XP_003032162.1		Lacc XP_001883306.1 Lacc XP_001885236.1	Pha_66199Pha_99062		XP_569650.1 XP_568244.1	XP_761975.1	NP_116616.1	XP_664442.1 XP_658786.1	XP_957669.2	Dikarya
ctg01_AA_00279				XP_001888738.1								Agaricales
ctg01_AA_00280	ctg01_AA_00281ctg01_AA_00289ctg01_AA_00262ctg01_AA_00264ctg01_AA_00268											F.velutipes
ctg01_AA_00281	ctg01_AA_00289ctg01_AA_00262ctg01_AA_00264ctg01_AA_00268ctg01_AA_00280											F.velutipes
ctg01_AA_00282		XP_003030892.1	XP_002910075.1	XP_001885936.1	Pha_31391		XP_572828.1	XP_759845.1		XP_658858.1	XP_965306.1	Dikarya
ctg01_AA_00283												F.velutipes
ctg01_AA_00284		XP_003035687.1	XP_001830855.2	XP_001877545.1	Pha_23805	XP_002469642.1						Agaricomycetes
ctg01_AA_00285	ctg01_AA_00286											F.velutipes
ctg01_AA_00286	ctg01_AA_00285											F.velutipes
ctg01_AA_00287												F.velutipes
ctg01_AA_00288												F.velutipes
ctg01_AA_00289	ctg01_AA_00262ctg01_AA_00264ctg01_AA_00268ctg01_AA_00280ctg01_AA_00281											F.velutipes
ctg01_AA_00290												F.velutipes
ctg01_AA_00291	ctg01_AA_00294ctg05_AA_00070		XP_001830618.2									Agaricales
ctg01_AA_00292												F.velutipes
ctg01_AA_00293		XP_003033339.1	XP_001838315.2 XP_001832182.1	XP_001873476.1	Pha_67079 Pha_67077		XP_571018.1	XP_760265.1 XP_758393.1	NP_013980.1 NP_015059.1	XP_658959.1	XP_001728385.1	Dikarya
ctg01_AA_00294	ctg05_AA_00070ctg01_AA_00291											F.velutipes
ctg01_AA_00295												F.velutipes
ctg01_AA_00296		XP_003030856.1	XP_001838385.2	XP_001880489.1	Pha_99314	XP_002476258.1	XP_572568.1	XP_761596.1	NP_011096.1	XP_658664.1	XP_955807.2	Dikarya
ctg01_AA_00297		XP_003030891.1	XP_001840258.1	XP_001879374.1	Pha_23871	XP_002475170.1		XP_757761.1				Basidiomycota
ctg01_AA_00298			XP_001840246.2 XP_001840262.2	XP_001879375.1								Agaricales
ctg01_AA_00299		XP_003030846.1	XP_001838393.2	XP_001889649.1	Pha_23634	XP_002470813.1	XP_572826.1	XP_758409.1	NP_010345.1	XP_658804.1	XP_958619.1	Dikarya
ctg01_AA_00300				XP_001874766.1								Agaricales
ctg01_AA_00301		XP_003030878.1	XP_001840170.2	XP_001879386.1	Pha_23692		XP_569635.1	XP_758417.1	NP_010967.1			Dikarya
ctg01_AA_00302	ctg05_AA_00396ctg11-2_AA_00063											F.velutipes
ctg01_AA_00303		XP_003031237.1	XP_001838380.2	XP_001889651.1	Pha_75266					XP_681351.1	XP_958520.1	Dikarya
ctg01_AA_00304		XP_003031235.1	XP_002910085.1	XP_001889683.1	Pha_28577		XP_571650.1	XP_757372.1		XP_662461.1	XP_964862.2	Dikarya
ctg01_AA_00305	ctg01_AA_00308ctg01_AA_00244											F.velutipes
ctg01_AA_00306	ctg01_AA_00307											F.velutipes
ctg01_AA_00307	ctg01_AA_00306											F.velutipes
ctg01_AA_00308	ctg06_AA_00302ctg01_AA_00244ctg01_AA_00305											F.velutipes
ctg01_AA_00309												F.velutipes
ctg01_AA_00310			XP_001838382.2	XP_001880246.1	Pha_70320							Agaricomycetes
ctg01_AA_00311		XP_003033511.1					XP_567088.1 XP_569542.1	XP_756702.1	NP_014582.1 NP_010262.1	XP_664396.1 XP_657955.1	XP_964395.2	Dikarya
ctg01_AA_00312		XP_003032944.1					XP_569538.1					Basidiomycota
ctg01_AA_00313												F.velutipes
ctg01_AA_00314		XP_003035627.1	XP_001841187.2	XP_001882816.1	Pha_97519	XP_002475488.1	XP_572011.1	XP_761601.1	NP_013967.1	XP_662702.1	XP_963443.2	Dikarya
ctg01_AA_00315			XP_001838383.1	XP_001880491.1								Agaricales
ctg01_AA_00316		XP_003030853.1	XP_001832831.1	XP_001883293.1	Pha_29779		XP_569681.1	XP_759684.1	NP_012447.1	XP_662013.1	XP_956873.2	Dikarya
ctg01_AA_00317	ctg01_AA_00318	XP_003034273.1	XP_002910710.1	XP_001876168.1	Pha_77826	XP_002472451.1	XP_571296.1					Basidiomycota
ctg01_AA_00318	ctg01_AA_00317	XP_003034273.1	XP_002910710.1	XP_001876168.1	Pha_77826	XP_002472451.1	XP_571296.1					Basidiomycota
ctg01_AA_00319	ctg01_AA_00320				Pha_69560	XP_002472025.1						Agaricomycetes
ctg01_AA_00320	ctg01_AA_00319	XP_003032800.1			Pha_98117	XP_002470328.1						Agaricomycetes
ctg01_AA_00321												F.velutipes
ctg01_AA_00322			XP_001839510.2									Agaricales
ctg01_AA_00323		XP_003030852.1	XP_001838390.1	XP_001880244.1	Pha_76265	XP_002470810.1	XP_566939.1					Basidiomycota
ctg01_AA_00324		XP_003028781.1	XP_001836305.2	XP_001880916.1	Pha_75762		XP_570198.1	XP_757624.1	NP_012728.1		XP_963932.1	Dikarya
ctg01_AA_00325												F.velutipes
ctg01_AA_00326												F.velutipes
ctg01_AA_00327		XP_003031245.1	XP_001830337.1	XP_001877792.1	Pha_76267		XP_567312.1	XP_757156.1	NP_116670.1 NP_013359.1	XP_681279.1	XP_961002.1	Dikarya
ctg01_AA_00328		XP_003028491.1 XP_003037659.1			Pha_70437	XP_002475431.1	XP_570351.1			XP_661283.1	XP_963761.1	Dikarya
ctg01_AA_00329												F.velutipes
ctg01_AA_00330		XP_003027767.1	XP_001831056.2	XP_001876963.1	Pha_27611		XP_572231.1	XP_761585.1				Basidiomycota
ctg01_AA_00331	ctg01_AA_00471ctg01_AA_00510ctg01_AA_00543ctg01_AA_00557											F.velutipes
ctg01_AA_00332	ctg01_AA_00334ctg11-2_AA_01227											F.velutipes
ctg01_AA_00333												F.velutipes
ctg01_AA_00334	ctg11-2_AA_01227ctg01_AA_00332											F.velutipes
ctg01_AA_00335												F.velutipes
ctg01_AA_00336												F.velutipes
ctg01_AA_00337		XP_003031248.1	XP_001836982.1	XP_001890227.1	Pha_25337		XP_571977.1	XP_760530.1	NP_010266.1 NP_014659.1	XP_681463.1	XP_961189.2	Dikarya
ctg01_AA_00338												F.velutipes
ctg01_AA_00339												F.velutipes
ctg01_AA_00340		XP_003030146.1	XP_001840075.1	XP_001880433.1	Pha_24571		XP_569432.1	XP_760965.1	NP_015109.1	XP_663417.1	XP_955800.1	Dikarya
ctg01_AA_00341												F.velutipes
ctg01_AA_00342												F.velutipes
ctg01_AA_00343		XP_003027636.1	XP_001834799.2			XP_002475614.1						Agaricomycetes
ctg01_AA_00344												F.velutipes
ctg01_AA_00345												F.velutipes
ctg01_AA_00346												F.velutipes
ctg01_AA_00347												F.velutipes
ctg01_AA_00348												F.velutipes
ctg01_AA_00349												F.velutipes
ctg01_AA_00350	ctg03_AA_00234ctg05_AA_00491ctg11-1_AA_00673ctg11-2_AA_00865ctg11-2_AA_01614											F.velutipes
ctg01_AA_00351	ctg03_AA_00235ctg05_AA_01290ctg05_AA_01584ctg11-1_AA_00632ctg11-2_AA_01615ctg13_AA_00851ctg26_AA_00319											F.velutipes
ctg01_AA_00352	ctg05_AA_01289ctg11-2_AA_01616											F.velutipes
ctg01_AA_00353	ctg11-2_AA_01617											F.velutipes
ctg01_AA_00354	ctg03_AA_00236ctg06_AA_00344ctg11-2_AA_00864ctg11-2_AA_01618ctg13_AA_00096											F.velutipes
ctg01_AA_00355	ctg03_AA_00236ctg05_AA_00490ctg05_AA_01288ctg11-1_AA_01448ctg11-2_AA_01619											F.velutipes
ctg01_AA_00356	ctg11-2_AA_01621											F.velutipes
ctg01_AA_00357	ctg11-2_AA_01623ctg29_AA_00025											F.velutipes
ctg01_AA_00358	ctg02_AA_00379ctg11-2_AA_01624ctg26_AA_00331ctg29_AA_00043ctg33_AA_00320											F.velutipes
ctg01_AA_00359	ctg11-2_AA_01625		XP_001830509.2 XP_002911466.1	XP_001884518.1	Pha_76350							Agaricomycetes
ctg01_AA_00360	ctg01_AA_00620ctg11-1_AA_00487ctg11-2_AA_01626											F.velutipes
ctg01_AA_00361	ctg11-1_AA_00487ctg11-2_AA_01301ctg11-2_AA_01627ctg11-2_AA_01628											F.velutipes
ctg01_AA_00362												F.velutipes
ctg01_AA_00363												F.velutipes
ctg01_AA_00364	ctg01_AA_00495ctg03_AA_00233ctg05_AA_01581ctg11-1_AA_00620ctg11-1_AA_00636ctg11-1_AA_00670ctg11-2_AA_01485ctg13_AA_00848	XP_003034834.1 XP_003039041.1 XP_003028092.1										Agaricales
ctg01_AA_00365		XP_003035683.1	XP_001837977.1	XP_001885475.1	Pha_72459		XP_569618.1	XP_757034.1				Basidiomycota
ctg01_AA_00366	ctg01_AA_00494ctg03_AA_00232ctg13_AA_00097											F.velutipes
ctg01_AA_00367												F.velutipes
ctg01_AA_00368												F.velutipes
ctg01_AA_00369		XP_003032553.1	XP_001828529.1	XP_001880071.1	Pha_66254	XP_002470032.1	XP_569687.1	XP_759960.1	NP_116657.1	XP_664584.1	XP_956908.1	Dikarya
ctg01_AA_00370	ctg01_AA_00423ctg06_AA_00414					XP_002468947.1						Agaricomycetes
ctg01_AA_00371		XP_003027982.1	XP_001834431.2	XP_001886312.1	Pha_69233					XP_682019.1	XP_964998.1	Dikarya
ctg01_AA_00372	ctg01_AA_00674ctg06_AA_00074ctg06_AA_00091ctg06_AA_00092ctg06_AA_00323ctg06_AA_00324ctg06_AA_00478ctg11-1_AA_00685ctg11-1_AA_00690ctg11-1_AA_00979ctg11-1_AA_00982ctg11-1_AA_00984ctg11-1_AA_01378ctg11-1_AA_01386ctg11-2_AA_01218ctg13_AA_00153ctg13_AA_00518ctg13_AA_00737ctg29_AA_00171ctg29_AA_00177ctg29_AA_00178ctg29_AA_00203ctg29_AA_00602ctg29_AA_00701ctg29_AA_00794ctg29_AA_00795ctg29_AA_00835ctg29…											F.velutipes
ctg01_AA_00373	ctg01_AA_00375ctg01_AA_00425									XP_680548.1		Ascomycota
ctg01_AA_00374		XP_003035683.1	XP_001837977.1	XP_001885475.1	Pha_72459		XP_569618.1	XP_757034.1				Basidiomycota
ctg01_AA_00375	ctg01_AA_00425ctg01_AA_00373											F.velutipes
ctg01_AA_00376												F.velutipes
ctg01_AA_00377												F.velutipes
ctg01_AA_00378												F.velutipes
ctg01_AA_00379												F.velutipes
ctg01_AA_00380	ctg01_AA_00447	XP_003030169.1	XP_002910647.1	XP_001876163.1						XP_680537.1 XP_659973.1	XP_961883.1	Dikarya
ctg01_AA_00381		XP_003027997.1	XP_001834429.2	XP_001886237.1	Pha_25468	XP_002471203.1	XP_570287.1	XP_758137.1	NP_013348.1	XP_663377.1	XP_960732.1	Dikarya
ctg01_AA_00382	ctg01_AA_00597ctg01_AA_00598ctg01_AA_00604ctg01_AA_00605ctg01_AA_00606ctg01_AA_00611ctg02_AA_00047ctg02_AA_00074ctg03_AA_01111ctg03_AA_01115ctg05_AA_00013ctg05_AA_01788ctg06_AA_00292ctg06_AA_00293ctg06_AA_00296ctg06_AA_00736ctg06_AA_00739ctg06_AA_00758ctg06_AA_00783ctg06_AA_00794ctg11-2_AA_01529ctg33_AA_00770ctg01_AA_00243											F.velutipes
ctg01_AA_00383	ctg03_AA_00475ctg11-1_AA_00709ctg29_AA_00652ctg33_AA_00587									XP_662162.1	XP_956755.1	Ascomycota
ctg01_AA_00384												F.velutipes
ctg01_AA_00385			XP_001838291.2	XP_001885888.1								Agaricales
ctg01_AA_00386	ctg13_AA_00223	XP_003033289.1 XP_003033296.1 XP_003037416.1	XP_001831685.1 XP_001831694.1 XP_001838905.1	XP_001883663.1 XP_001883792.1 XP_001890242.1 XP_001891102.1	Pha_76817Pha_66076Pha_66044	XP_002473596.1	XP_568101.1 XP_569504.1	XP_758857.1	NP_009563.1 NP_014368.1	XP_660030.1 XP_658338.1	XP_956597.1XP_956002.2	Dikarya
ctg01_AA_00387		XP_003029549.1 XP_003029157.1 XP_003031858.1			Pha_69857	XP_002472899.1				XP_659810.1		Dikarya
ctg01_AA_00388		XP_003033211.1	XP_001840270.2	XP_001890221.1	Pha_76257		XP_567890.1	XP_762007.1	NP_116708.1	XP_663387.1	XP_957993.1	Dikarya
ctg01_AA_00389												F.velutipes
ctg01_AA_00390												F.velutipes
ctg01_AA_00391	ctg03_AA_00097ctg06_AA_00208ctg06_AA_00214ctg06_AA_00217ctg06_AA_00229ctg06_AA_00235ctg06_AA_00242ctg06_AA_00246ctg06_AA_00255ctg06_AA_00257											F.velutipes
ctg01_AA_00392	ctg03_AA_00098									XP_658675.1	XP_963914.1	Ascomycota
ctg01_AA_00393	ctg13_AA_00358											F.velutipes
ctg01_AA_00394	ctg01_AA_00395											F.velutipes
ctg01_AA_00395	ctg01_AA_00394	XP_003030864.1	XP_001840175.1		Pha_95153		XP_569532.1	XP_759746.1	NP_011975.1	XP_681451.1	XP_961184.1	Dikarya
ctg01_AA_00396												F.velutipes
ctg01_AA_00397	ctg11-1_AA_01434											F.velutipes
ctg01_AA_00398	ctg33_AA_00494	XP_003028651.1	XP_001832906.2 XP_001838381.2		Pha_75306Pha_98885	XP_002474490.1 XP_002474498.1	XP_571560.1					Basidiomycota
ctg01_AA_00399												F.velutipes
ctg01_AA_00400												F.velutipes
ctg01_AA_00401	ctg02_AA_00181											F.velutipes
ctg01_AA_00402												F.velutipes
ctg01_AA_00403		XP_003030843.1	XP_002910086.1	XP_001889650.1	Pha_96286		XP_566629.1					Basidiomycota
ctg01_AA_00404		XP_003030831.1	XP_001838395.1	XP_001889647.1	Pha_75478	XP_002477646.1	XP_572105.1	XP_759916.1		XP_660291.1	XP_956854.2	Dikarya
ctg01_AA_00405		XP_003030842.1	XP_001838394.2	XP_001889681.1	Pha_29285	XP_002476947.1	XP_572273.1	XP_756360.1	NP_011732.1		XP_959899.2	Dikarya
ctg01_AA_00406	ctg01_AA_00407ctg01_AA_00409ctg01_AA_00412ctg01_AA_00413ctg06_AA_00044ctg11-1_AA_01468ctg29_AA_00738ctg29_AA_00785											F.velutipes
ctg01_AA_00407	ctg01_AA_00409ctg01_AA_00413ctg11-1_AA_01468ctg11-1_AA_01484ctg29_AA_00738ctg29_AA_00785ctg01_AA_00406											F.velutipes
ctg01_AA_00408												F.velutipes
ctg01_AA_00409	ctg01_AA_00412ctg01_AA_00413ctg06_AA_00434ctg11-1_AA_01468ctg11-1_AA_01484ctg29_AA_00738ctg29_AA_00768ctg29_AA_00774ctg01_AA_00406ctg01_AA_00407											F.velutipes
ctg01_AA_00410		XP_003027988.1	XP_001834435.2	XP_001886226.1	Pha_98838	XP_002471158.1	XP_569547.1	XP_761135.1	NP_014865.1	XP_658903.1	XP_960396.2	Dikarya
ctg01_AA_00411		XP_003027994.1	XP_001834471.2	XP_001886200.1	Pha_75156							Agaricomycetes
ctg01_AA_00412	ctg01_AA_00413ctg05_AA_01837ctg06_AA_00434ctg11-1_AA_01468ctg29_AA_00738ctg29_AA_00768ctg29_AA_00774ctg29_AA_00785ctg01_AA_00406ctg01_AA_00409											F.velutipes
ctg01_AA_00413	ctg06_AA_00434ctg06_AA_00465ctg11-1_AA_01468ctg11-1_AA_01484ctg01_AA_00406ctg01_AA_00407ctg01_AA_00409ctg01_AA_00412											F.velutipes
ctg01_AA_00414	ctg01_AA_00518											F.velutipes
ctg01_AA_00415		XP_003035349.1	XP_002911158.1	XP_001890249.1	Pha_69007	XP_002470816.1		XP_759688.1				Basidiomycota
ctg01_AA_00416		XP_003028019.1	XP_001834422.2	XP_001886326.1	Pha_25466	XP_002471204.1		XP_758473.1		XP_662401.1	XP_964252.1	Dikarya
ctg01_AA_00417	ctg02_AA_00388ctg05_AA_01158ctg11-1_AA_00082ctg11-2_AA_01302ctg26_AA_00322			XP_001874973.1		XP_002470912.1						Agaricomycetes
ctg01_AA_00418												F.velutipes
ctg01_AA_00419												F.velutipes
ctg01_AA_00420		XP_003028296.1	XP_001834468.2	XP_001886314.1	Pha_96373		XP_571431.1		NP_015486.1	XP_658619.1	XP_962166.2	Dikarya
ctg01_AA_00421												F.velutipes
ctg01_AA_00422	ctg01_AA_00444											F.velutipes
ctg01_AA_00423	ctg01_AA_00370											F.velutipes
ctg01_AA_00424												F.velutipes
ctg01_AA_00425	ctg01_AA_00373ctg01_AA_00375											F.velutipes
ctg01_AA_00426	ctg01_AA_00427ctg01_AA_00429ctg01_AA_00430ctg01_AA_00431ctg01_AA_00434ctg01_AA_00461ctg01_AA_00465ctg01_AA_00470ctg01_AA_00473ctg01_AA_00478ctg01_AA_00502ctg01_AA_00504ctg01_AA_00527ctg01_AA_00530ctg01_AA_00542ctg01_AA_00546ctg01_AA_00547ctg01_AA_00109ctg01_AA_00110ctg01_AA_00111ctg01_AA_00117ctg01_AA_00119ctg01_AA_00123ctg01_AA_00125ctg01_AA_00127											F.velutipes
ctg01_AA_00427	ctg01_AA_00429ctg01_AA_00430ctg01_AA_00431ctg01_AA_00434ctg01_AA_00461ctg01_AA_00465ctg01_AA_00470ctg01_AA_00473ctg01_AA_00478ctg01_AA_00502ctg01_AA_00504ctg01_AA_00527ctg01_AA_00530ctg01_AA_00542ctg01_AA_00546ctg01_AA_00547ctg13_AA_00233ctg01_AA_00109ctg01_AA_00110ctg01_AA_00111ctg01_AA_00117ctg01_AA_00119ctg01_AA_00123ctg01_AA_00125ctg01_AA_00126ctg01_AA_00127ctg01_AA_00426											F.velutipes
ctg01_AA_00428												F.velutipes
ctg01_AA_00429	ctg01_AA_00430ctg01_AA_00434ctg01_AA_00461ctg01_AA_00465ctg01_AA_00470ctg01_AA_00473ctg01_AA_00478ctg01_AA_00502ctg01_AA_00504ctg01_AA_00507ctg01_AA_00530ctg01_AA_00542ctg01_AA_00546ctg01_AA_00547ctg01_AA_00109ctg01_AA_00111ctg01_AA_00115ctg01_AA_00117ctg01_AA_00119ctg01_AA_00123ctg01_AA_00426ctg01_AA_00427											F.velutipes
ctg01_AA_00430	ctg01_AA_00431ctg01_AA_00434ctg01_AA_00461ctg01_AA_00465ctg01_AA_00470ctg01_AA_00473ctg01_AA_00478ctg01_AA_00502ctg01_AA_00504ctg01_AA_00527ctg01_AA_00530ctg01_AA_00542ctg01_AA_00546ctg01_AA_00547ctg13_AA_00233ctg01_AA_00109ctg01_AA_00110ctg01_AA_00111ctg01_AA_00117ctg01_AA_00119ctg01_AA_00123ctg01_AA_00125ctg01_AA_00126ctg01_AA_00127ctg01_AA_00426ctg01_AA_00427ctg01_AA_00429											F.velutipes
ctg01_AA_00431	ctg01_AA_00434ctg01_AA_00461ctg01_AA_00465ctg01_AA_00473ctg01_AA_00478ctg01_AA_00502ctg01_AA_00504ctg01_AA_00527ctg01_AA_00530ctg01_AA_00546ctg01_AA_00547ctg01_AA_00109ctg01_AA_00110ctg01_AA_00111ctg01_AA_00117ctg01_AA_00119ctg01_AA_00123ctg01_AA_00125ctg01_AA_00126ctg01_AA_00127ctg01_AA_00426ctg01_AA_00427ctg01_AA_00430											F.velutipes
ctg01_AA_00432												F.velutipes
ctg01_AA_00433	ctg01_AA_00509ctg05_AA_01167ctg05_AA_01207ctg05_AA_01819ctg05_AA_01823ctg11-1_AA_01366ctg13_AA_00008ctg13_AA_00024ctg13_AA_00030ctg13_AA_00035ctg13_AA_00038ctg13_AA_00040ctg13_AA_00044ctg13_AA_00045ctg13_AA_00049ctg13_AA_01042ctg26_AA_00061ctg26_AA_00074ctg26_AA_00075ctg26_AA_00089ctg26_AA_00092ctg26_AA_00527ctg01_AA_00010ctg01_AA_00020ctg01_AA_00029ctg01_AA_00031ctg01_AA_00049ctg01_AA_00052ctg01…											F.velutipes
ctg01_AA_00434	ctg01_AA_00461ctg01_AA_00465ctg01_AA_00470ctg01_AA_00473ctg01_AA_00478ctg01_AA_00502ctg01_AA_00504ctg01_AA_00527ctg01_AA_00530ctg01_AA_00542ctg01_AA_00547ctg01_AA_00109ctg01_AA_00110ctg01_AA_00111ctg01_AA_00117ctg01_AA_00119ctg01_AA_00123ctg01_AA_00125ctg01_AA_00126ctg01_AA_00127ctg01_AA_00426ctg01_AA_00427ctg01_AA_00429ctg01_AA_00430ctg01_AA_00431		XP_001838824.2	XP_001882064.1								Agaricales
ctg01_AA_00435												F.velutipes
ctg01_AA_00436	ctg01_AA_00437ctg01_AA_00441ctg01_AA_00450ctg01_AA_00457ctg05_AA_00311ctg05_AA_00312											F.velutipes
ctg01_AA_00437	ctg01_AA_00441ctg01_AA_00450ctg01_AA_00457ctg05_AA_00312ctg01_AA_00436											F.velutipes
ctg01_AA_00438		XP_003034767.1	XP_001841194.1	XP_001886139.1			XP_569434.1	XP_756420.1	NP_012109.1	XP_661911.1	XP_963520.1	Dikarya
ctg01_AA_00439		XP_003026663.1	XP_002910441.1	XP_001886228.1	Pha_69234			XP_762209.1				Basidiomycota
ctg01_AA_00440	ctg01_AA_00450ctg01_AA_00457											F.velutipes
ctg01_AA_00441	ctg01_AA_00450ctg01_AA_00457ctg05_AA_00312ctg01_AA_00436ctg01_AA_00437											F.velutipes
ctg01_AA_00442		XP_003026893.1										Agaricales
ctg01_AA_00443		XP_003030410.1										Agaricales
ctg01_AA_00444	ctg01_AA_00422											F.velutipes
ctg01_AA_00445												F.velutipes
ctg01_AA_00446												F.velutipes
ctg01_AA_00447	ctg33_AA_00151ctg01_AA_00380	XP_003030169.1	XP_002910647.1	XP_001876163.1						XP_680537.1 XP_659973.1	XP_961883.1	Dikarya
ctg01_AA_00448												F.velutipes
ctg01_AA_00449												F.velutipes
ctg01_AA_00450	ctg01_AA_00457ctg05_AA_00311ctg05_AA_00312ctg01_AA_00436ctg01_AA_00437ctg01_AA_00440ctg01_AA_00441											F.velutipes
ctg01_AA_00451	ctg01_AA_00458											F.velutipes
ctg01_AA_00452			XP_001835603.2 XP_001838604.2 XP_001838073.2	XP_001888190.1 XP_001882887.1						XP_660440.1	XP_963964.1 XP_957117.1	Dikarya
ctg01_AA_00453		XP_003028561.1	XP_001831235.1	XP_001882733.1						XP_664705.1	XP_962814.1	Dikarya
ctg01_AA_00454												F.velutipes
ctg01_AA_00455		XP_003033228.1	XP_001831594.2	XP_001887378.1 XP_001883635.1	Pha_76187 Pha_27098	XP_002475046.1		XP_758069.1		XP_661872.1	XP_957588.1	Dikarya
ctg01_AA_00456												F.velutipes
ctg01_AA_00457	ctg05_AA_00311ctg05_AA_00312ctg01_AA_00436ctg01_AA_00437ctg01_AA_00440ctg01_AA_00441ctg01_AA_00450											F.velutipes
ctg01_AA_00458	ctg01_AA_00451											F.velutipes
ctg01_AA_00459												F.velutipes
ctg01_AA_00460												F.velutipes
ctg01_AA_00461	ctg01_AA_00465ctg01_AA_00470ctg01_AA_00473ctg01_AA_00478ctg01_AA_00502ctg01_AA_00504ctg01_AA_00507ctg01_AA_00527ctg01_AA_00530ctg01_AA_00542ctg01_AA_00546ctg01_AA_00547ctg13_AA_00233ctg01_AA_00109ctg01_AA_00110ctg01_AA_00111ctg01_AA_00117ctg01_AA_00119ctg01_AA_00123ctg01_AA_00125ctg01_AA_00127ctg01_AA_00426ctg01_AA_00427ctg01_AA_00429ctg01_AA_00430ctg01_AA_00431ctg01_AA_00434											F.velutipes
ctg01_AA_00462	ctg01_AA_00463ctg03_AA_01297ctg05_AA_00318ctg26_AA_00457	XP_003032386.1 XP_003034383.1	XP_001839707.2XP_001828317.2XP_001841141.2XP_001839683.1	XP_001884729.1 XP_001888003.1 XP_001888293.1 XP_001877559.1 XP_001889138.1 XP_001889147.1 XP_001882848.1 XP_001889151.1 XP_001889155.1 XP_001889142.1 XP_001890441.1 XP_001889158.1 XP_001877608.1 XP_001877979.1 XP_001875578.1 XP_001882641.1 XP_001878900.1 XP_001879065.1 XP_001889800.1 XP_001889262.1 XP_001888239.1 XP_001886877.1 XP_001886599.1 XP_001882908.1 XP_001882787.1 XP_001878905.1	Pha_76292Pha_94212	XP_002471295.1				XP_681737.1		Dikarya
ctg01_AA_00463	ctg03_AA_01297ctg05_AA_00318ctg26_AA_00457ctg01_AA_00462	XP_003032386.1 XP_003034383.1	XP_001839707.2XP_001828317.2XP_001841141.2XP_001839683.1	XP_001884729.1 XP_001888003.1 XP_001888293.1 XP_001877559.1 XP_001889138.1 XP_001889147.1 XP_001882848.1 XP_001889151.1 XP_001889155.1 XP_001889142.1 XP_001890441.1 XP_001889158.1 XP_001877608.1 XP_001877979.1 XP_001875578.1 XP_001882641.1 XP_001878900.1 XP_001879065.1 XP_001889800.1 XP_001889262.1 XP_001888239.1 XP_001886877.1 XP_001886599.1 XP_001882908.1 XP_001882787.1 XP_001878905.1	Pha_76292Pha_94212	XP_002471295.1				XP_681737.1		Dikarya
ctg01_AA_00464												F.velutipes
ctg01_AA_00465	ctg01_AA_00470ctg01_AA_00473ctg01_AA_00478ctg01_AA_00502ctg01_AA_00504ctg01_AA_00527ctg01_AA_00530ctg01_AA_00542ctg01_AA_00546ctg01_AA_00547ctg13_AA_00233ctg01_AA_00109ctg01_AA_00110ctg01_AA_00111ctg01_AA_00117ctg01_AA_00119ctg01_AA_00123ctg01_AA_00125ctg01_AA_00126ctg01_AA_00127ctg01_AA_00426ctg01_AA_00427ctg01_AA_00429ctg01_AA_00430ctg01_AA_00431ctg01_AA_00434ctg01_AA_00461											F.velutipes
ctg01_AA_00466												F.velutipes
ctg01_AA_00467												F.velutipes
ctg01_AA_00468	ctg06_AA_00478ctg06_AA_00487ctg06_AA_00491ctg11-1_AA_00982											F.velutipes
ctg01_AA_00469												F.velutipes
ctg01_AA_00470	ctg01_AA_00473ctg01_AA_00478ctg01_AA_00502ctg01_AA_00504ctg01_AA_00527ctg01_AA_00530ctg01_AA_00542ctg01_AA_00546ctg01_AA_00547ctg01_AA_00109ctg01_AA_00110ctg01_AA_00111ctg01_AA_00117ctg01_AA_00119ctg01_AA_00123ctg01_AA_00125ctg01_AA_00127ctg01_AA_00426ctg01_AA_00427ctg01_AA_00429ctg01_AA_00430ctg01_AA_00434ctg01_AA_00461ctg01_AA_00465											F.velutipes
ctg01_AA_00471	ctg01_AA_00510ctg01_AA_00543ctg01_AA_00557ctg01_AA_00331											F.velutipes
ctg01_AA_00472												F.velutipes
ctg01_AA_00473	ctg01_AA_00478ctg01_AA_00502ctg01_AA_00504ctg01_AA_00527ctg01_AA_00530ctg01_AA_00542ctg01_AA_00546ctg01_AA_00547ctg13_AA_00233ctg01_AA_00109ctg01_AA_00110ctg01_AA_00111ctg01_AA_00117ctg01_AA_00119ctg01_AA_00123ctg01_AA_00125ctg01_AA_00127ctg01_AA_00426ctg01_AA_00427ctg01_AA_00429ctg01_AA_00430ctg01_AA_00431ctg01_AA_00434ctg01_AA_00461ctg01_AA_00465ctg01_AA_00470											F.velutipes
ctg01_AA_00474												F.velutipes
ctg01_AA_00475												F.velutipes
ctg01_AA_00476												F.velutipes
ctg01_AA_00477												F.velutipes
ctg01_AA_00478	ctg01_AA_00502ctg01_AA_00504ctg01_AA_00527ctg01_AA_00530ctg01_AA_00542ctg01_AA_00546ctg01_AA_00547ctg01_AA_00110ctg01_AA_00111ctg01_AA_00117ctg01_AA_00119ctg01_AA_00123ctg01_AA_00127ctg01_AA_00426ctg01_AA_00427ctg01_AA_00429ctg01_AA_00430ctg01_AA_00431ctg01_AA_00434ctg01_AA_00461ctg01_AA_00465ctg01_AA_00470ctg01_AA_00473											F.velutipes
ctg01_AA_00479												F.velutipes
ctg01_AA_00480												F.velutipes
ctg01_AA_00481	ctg01_AA_00486											F.velutipes
ctg01_AA_00482												F.velutipes
ctg01_AA_00483												F.velutipes
ctg01_AA_00484					Pha_27477							Agaricomycetes
ctg01_AA_00485												F.velutipes
ctg01_AA_00486	ctg01_AA_00481											F.velutipes
ctg01_AA_00487												F.velutipes
ctg01_AA_00488	ctg01_AA_00499											F.velutipes
ctg01_AA_00489												F.velutipes
ctg01_AA_00490	ctg01_AA_00585ctg03_AA_00001ctg05_AA_00201ctg13_AA_00086ctg26_AA_00327											F.velutipes
ctg01_AA_00491				XP_001881378.1								Agaricales
ctg01_AA_00492	ctg02_AA_00473ctg02_AA_00541ctg05_AA_00203ctg11-1_AA_00630											F.velutipes
ctg01_AA_00493	ctg13_AA_00473ctg26_AA_00334ctg29_AA_00928											F.velutipes
ctg01_AA_00494	ctg03_AA_00232ctg11-1_AA_00631ctg13_AA_00097ctg01_AA_00366											F.velutipes
ctg01_AA_00495	ctg03_AA_00233ctg11-1_AA_00670ctg11-2_AA_01485ctg01_AA_00364	XP_003034834.1 XP_003039041.1 XP_003028092.1										Agaricales
ctg01_AA_00496	ctg01_AA_00536ctg01_AA_00586ctg02_AA_00103ctg11-1_AA_00627ctg13_AA_00099ctg13_AA_00474ctg13_AA_00771	XP_003032982.1	XP_002910400.1		Pha_76248							Agaricomycetes
ctg01_AA_00497	ctg01_AA_00498ctg11-1_AA_00628			XP_001891218.1 XP_001884934.1								Agaricales
ctg01_AA_00498	ctg11-1_AA_00628ctg01_AA_00497	XP_003027008.1 XP_003027664.1 XP_003027908.1 XP_003028228.1 XP_003030784.1 XP_003031156.1 XP_003032309.1 XP_003032736.1 XP_003033317.1 XP_003038050.1 XP_003028799.1										Agaricales
ctg01_AA_00499	ctg29_AA_00901ctg33_AA_00061ctg01_AA_00488											F.velutipes
ctg01_AA_00500	ctg01_AA_00566ctg01_AA_00569ctg01_AA_00570ctg01_AA_00573ctg06_AA_00745											F.velutipes
ctg01_AA_00501												F.velutipes
ctg01_AA_00502	ctg01_AA_00504ctg01_AA_00527ctg01_AA_00530ctg01_AA_00542ctg01_AA_00546ctg01_AA_00547ctg13_AA_00233ctg01_AA_00109ctg01_AA_00110ctg01_AA_00111ctg01_AA_00117ctg01_AA_00119ctg01_AA_00123ctg01_AA_00125ctg01_AA_00127ctg01_AA_00426ctg01_AA_00427ctg01_AA_00429ctg01_AA_00430ctg01_AA_00431ctg01_AA_00434ctg01_AA_00461ctg01_AA_00465ctg01_AA_00470ctg01_AA_00473ctg01_AA_00478											F.velutipes
ctg01_AA_00503	ctg01_AA_00520ctg01_AA_00559ctg01_AA_00560ctg01_AA_00593ctg01_AA_00594ctg01_AA_00596ctg01_AA_00603ctg02_AA_00065ctg03_AA_01300ctg03_AA_01311ctg05_AA_00334ctg06_AA_00037ctg13_AA_00009ctg01_AA_00030ctg01_AA_00031ctg01_AA_00032ctg01_AA_00037ctg01_AA_00038ctg01_AA_00043ctg01_AA_00050ctg01_AA_00051ctg01_AA_00055ctg01_AA_00059ctg01_AA_00069ctg01_AA_00087ctg01_AA_00091											F.velutipes
ctg01_AA_00504	ctg01_AA_00527ctg01_AA_00530ctg01_AA_00542ctg01_AA_00547ctg01_AA_00109ctg01_AA_00110ctg01_AA_00111ctg01_AA_00117ctg01_AA_00119ctg01_AA_00123ctg01_AA_00125ctg01_AA_00126ctg01_AA_00127ctg01_AA_00426ctg01_AA_00427ctg01_AA_00429ctg01_AA_00430ctg01_AA_00431ctg01_AA_00434ctg01_AA_00461ctg01_AA_00465ctg01_AA_00470ctg01_AA_00473ctg01_AA_00478ctg01_AA_00502											F.velutipes
ctg01_AA_00505												F.velutipes
ctg01_AA_00506												F.velutipes
ctg01_AA_00507	ctg01_AA_00542ctg01_AA_00429ctg01_AA_00461											F.velutipes
ctg01_AA_00508		XP_003028628.1										Agaricales
ctg01_AA_00509	ctg05_AA_01167ctg05_AA_01207ctg05_AA_01819ctg05_AA_01823ctg11-1_AA_01366ctg13_AA_00008ctg13_AA_00023ctg13_AA_00024ctg13_AA_00030ctg13_AA_00035ctg13_AA_00038ctg13_AA_00040ctg13_AA_00044ctg13_AA_00045ctg13_AA_00049ctg13_AA_01042ctg26_AA_00061ctg26_AA_00074ctg26_AA_00075ctg26_AA_00089ctg26_AA_00092ctg26_AA_00527ctg01_AA_00020ctg01_AA_00029ctg01_AA_00031ctg01_AA_00049ctg01_AA_00052ctg01_AA_00056ctg01…											F.velutipes
ctg01_AA_00510	ctg01_AA_00543ctg01_AA_00557ctg01_AA_00331ctg01_AA_00471											F.velutipes
ctg01_AA_00511												F.velutipes
ctg01_AA_00512												F.velutipes
ctg01_AA_00513												F.velutipes
ctg01_AA_00514												F.velutipes
ctg01_AA_00515												F.velutipes
ctg01_AA_00516	ctg01_AA_00562ctg01_AA_00576											F.velutipes
ctg01_AA_00517												F.velutipes
ctg01_AA_00518	ctg01_AA_00414											F.velutipes
ctg01_AA_00519	ctg01_AA_00555ctg01_AA_00556											F.velutipes
ctg01_AA_00520	ctg01_AA_00559ctg01_AA_00560ctg01_AA_00593ctg01_AA_00594ctg01_AA_00596ctg01_AA_00603ctg02_AA_00042ctg02_AA_00065ctg05_AA_00334ctg06_AA_00037ctg13_AA_00009ctg01_AA_00030ctg01_AA_00031ctg01_AA_00032ctg01_AA_00037ctg01_AA_00038ctg01_AA_00043ctg01_AA_00050ctg01_AA_00051ctg01_AA_00055ctg01_AA_00069ctg01_AA_00087ctg01_AA_00091ctg01_AA_00503											F.velutipes
ctg01_AA_00521		XP_003035882.1	XP_001833492.1	XP_001878325.1			XP_567849.1	XP_759012.1		XP_658372.1	XP_965835.1	Dikarya
ctg01_AA_00522												F.velutipes
ctg01_AA_00523	ctg02_AA_00178ctg02_AA_00456ctg02_AA_00462ctg02_AA_00469ctg02_AA_00524ctg02_AA_00530ctg05_AA_01753ctg06_AA_00124ctg11-1_AA_00322ctg11-2_AA_01280ctg33_AA_01107											F.velutipes
ctg01_AA_00524	ctg01_AA_00553ctg01_AA_00554ctg02_AA_00458ctg02_AA_00463ctg02_AA_00470ctg02_AA_00526ctg02_AA_00531ctg02_AA_00538ctg03_AA_01255ctg05_AA_01509ctg05_AA_01754ctg06_AA_00125ctg06_AA_00129ctg06_AA_00138ctg06_AA_00144ctg11-1_AA_00321ctg11-2_AA_00806ctg11-2_AA_01281ctg13_AA_00378ctg26_AA_00184											F.velutipes
ctg01_AA_00525	ctg01_AA_00526ctg11-2_AA_00915											F.velutipes
ctg01_AA_00526	ctg11-2_AA_00915ctg01_AA_00525											F.velutipes
ctg01_AA_00527	ctg01_AA_00530ctg01_AA_00546ctg01_AA_00547ctg13_AA_00233ctg01_AA_00109ctg01_AA_00110ctg01_AA_00111ctg01_AA_00117ctg01_AA_00119ctg01_AA_00123ctg01_AA_00125ctg01_AA_00126ctg01_AA_00127ctg01_AA_00426ctg01_AA_00427ctg01_AA_00430ctg01_AA_00431ctg01_AA_00434ctg01_AA_00461ctg01_AA_00465ctg01_AA_00470ctg01_AA_00473ctg01_AA_00478ctg01_AA_00502ctg01_AA_00504											F.velutipes
ctg01_AA_00528												F.velutipes
ctg01_AA_00529												F.velutipes
ctg01_AA_00530	ctg01_AA_00542ctg01_AA_00546ctg01_AA_00547ctg01_AA_00109ctg01_AA_00110ctg01_AA_00111ctg01_AA_00117ctg01_AA_00119ctg01_AA_00123ctg01_AA_00126ctg01_AA_00127ctg01_AA_00426ctg01_AA_00427ctg01_AA_00429ctg01_AA_00430ctg01_AA_00431ctg01_AA_00434ctg01_AA_00461ctg01_AA_00465ctg01_AA_00470ctg01_AA_00473ctg01_AA_00478ctg01_AA_00502ctg01_AA_00504ctg01_AA_00527											F.velutipes
ctg01_AA_00531												F.velutipes
ctg01_AA_00532												F.velutipes
ctg01_AA_00533		XP_003032566.1		XP_001885659.1 XP_001882403.1		XP_002475852.1						Agaricomycetes
ctg01_AA_00534	ctg01_AA_00535	XP_003038784.1	XP_001838040.2	XP_001880310.1 XP_001884027.1		XP_002473298.1						Agaricomycetes
ctg01_AA_00535	ctg01_AA_00534											F.velutipes
ctg01_AA_00536	ctg01_AA_00586ctg02_AA_00103ctg11-1_AA_00627ctg13_AA_00099ctg13_AA_00474ctg13_AA_00771ctg01_AA_00496											F.velutipes
ctg01_AA_00537	ctg05_AA_01157ctg06_AA_00347ctg13_AA_00772											F.velutipes
ctg01_AA_00538												F.velutipes
ctg01_AA_00539												F.velutipes
ctg01_AA_00540												F.velutipes
ctg01_AA_00541												F.velutipes
ctg01_AA_00542	ctg01_AA_00546ctg01_AA_00547ctg11-1_AA_00642ctg01_AA_00109ctg01_AA_00110ctg01_AA_00111ctg01_AA_00115ctg01_AA_00117ctg01_AA_00119ctg01_AA_00123ctg01_AA_00127ctg01_AA_00426ctg01_AA_00427ctg01_AA_00429ctg01_AA_00430ctg01_AA_00434ctg01_AA_00461ctg01_AA_00465ctg01_AA_00470ctg01_AA_00473ctg01_AA_00478ctg01_AA_00502ctg01_AA_00504ctg01_AA_00507ctg01_AA_00530											F.velutipes
ctg01_AA_00543	ctg01_AA_00557ctg01_AA_00331ctg01_AA_00471ctg01_AA_00510											F.velutipes
ctg01_AA_00544												F.velutipes
ctg01_AA_00545												F.velutipes
ctg01_AA_00546	ctg01_AA_00547ctg01_AA_00109ctg01_AA_00110ctg01_AA_00111ctg01_AA_00117ctg01_AA_00119ctg01_AA_00123ctg01_AA_00125ctg01_AA_00126ctg01_AA_00127ctg01_AA_00426ctg01_AA_00427ctg01_AA_00429ctg01_AA_00430ctg01_AA_00431ctg01_AA_00461ctg01_AA_00465ctg01_AA_00470ctg01_AA_00473ctg01_AA_00478ctg01_AA_00502ctg01_AA_00527ctg01_AA_00530ctg01_AA_00542											F.velutipes
ctg01_AA_00547	ctg01_AA_00109ctg01_AA_00110ctg01_AA_00111ctg01_AA_00117ctg01_AA_00119ctg01_AA_00123ctg01_AA_00125ctg01_AA_00127ctg01_AA_00426ctg01_AA_00427ctg01_AA_00429ctg01_AA_00430ctg01_AA_00431ctg01_AA_00434ctg01_AA_00461ctg01_AA_00465ctg01_AA_00470ctg01_AA_00473ctg01_AA_00478ctg01_AA_00502ctg01_AA_00504ctg01_AA_00527ctg01_AA_00530ctg01_AA_00542ctg01_AA_00546											F.velutipes
ctg01_AA_00548												F.velutipes
ctg01_AA_00549	ctg26_AA_00252ctg26_AA_00253			XP_001876386.1								Agaricales
ctg01_AA_00550	ctg06_AA_00657ctg26_AA_00250ctg26_AA_00251	XP_003028375.1		XP_001885575.1								Agaricales
ctg01_AA_00551		XP_003036328.1 XP_003036325.1		XP_001876852.1	Pha_78340							Agaricomycetes
ctg01_AA_00552												F.velutipes
ctg01_AA_00553	ctg01_AA_00554ctg02_AA_00458ctg02_AA_00463ctg02_AA_00470ctg02_AA_00526ctg02_AA_00531ctg02_AA_00538ctg03_AA_01255ctg06_AA_00125ctg06_AA_00129ctg06_AA_00138ctg06_AA_00144ctg11-1_AA_00321ctg11-2_AA_00806ctg11-2_AA_01281ctg13_AA_00378ctg01_AA_00524											F.velutipes
ctg01_AA_00554	ctg02_AA_00458ctg02_AA_00463ctg02_AA_00470ctg02_AA_00526ctg02_AA_00531ctg02_AA_00538ctg03_AA_01255ctg05_AA_01509ctg05_AA_01754ctg06_AA_00125ctg06_AA_00129ctg06_AA_00138ctg06_AA_00144ctg11-1_AA_00321ctg11-2_AA_00806ctg11-2_AA_01281ctg13_AA_00378ctg26_AA_00184ctg01_AA_00524ctg01_AA_00553											F.velutipes
ctg01_AA_00555	ctg01_AA_00556ctg01_AA_00519											F.velutipes
ctg01_AA_00556	ctg01_AA_00519ctg01_AA_00555											F.velutipes
ctg01_AA_00557	ctg01_AA_00331ctg01_AA_00471ctg01_AA_00510ctg01_AA_00543			XP_001883367.1								Agaricales
ctg01_AA_00558	ctg33_AA_01174ctg01_AA_00237ctg01_AA_00241ctg01_AA_00246											F.velutipes
ctg01_AA_00559	ctg01_AA_00560ctg01_AA_00593ctg01_AA_00596ctg01_AA_00603ctg02_AA_00065ctg05_AA_00334ctg06_AA_00037ctg13_AA_00009ctg01_AA_00030ctg01_AA_00031ctg01_AA_00032ctg01_AA_00037ctg01_AA_00038ctg01_AA_00043ctg01_AA_00046ctg01_AA_00050ctg01_AA_00051ctg01_AA_00055ctg01_AA_00069ctg01_AA_00087ctg01_AA_00091ctg01_AA_00503ctg01_AA_00520											F.velutipes
ctg01_AA_00560	ctg01_AA_00030ctg01_AA_00031ctg01_AA_00032ctg01_AA_00050ctg01_AA_00055ctg01_AA_00087ctg01_AA_00503ctg01_AA_00520ctg01_AA_00559											F.velutipes
ctg01_AA_00561												F.velutipes
ctg01_AA_00562	ctg01_AA_00576ctg01_AA_00516											F.velutipes
ctg01_AA_00563			XP_002910432.1 XP_002910431.1	XP_001886578.1	Pha_64513	XP_002471246.1 XP_002471247.1 XP_002471283.1						Agaricomycetes
ctg01_AA_00564												F.velutipes
ctg01_AA_00565												F.velutipes
ctg01_AA_00566	ctg01_AA_00569ctg01_AA_00570ctg01_AA_00573ctg01_AA_00578ctg06_AA_00745ctg01_AA_00500											F.velutipes
ctg01_AA_00567												F.velutipes
ctg01_AA_00568												F.velutipes
ctg01_AA_00569	ctg01_AA_00570ctg01_AA_00573ctg06_AA_00745ctg01_AA_00500ctg01_AA_00566											F.velutipes
ctg01_AA_00570	ctg01_AA_00573ctg06_AA_00745ctg01_AA_00500ctg01_AA_00566ctg01_AA_00569											F.velutipes
ctg01_AA_00571												F.velutipes
ctg01_AA_00572												F.velutipes
ctg01_AA_00573	ctg06_AA_00745ctg01_AA_00500ctg01_AA_00566ctg01_AA_00569ctg01_AA_00570											F.velutipes
ctg01_AA_00574												F.velutipes
ctg01_AA_00575												F.velutipes
ctg01_AA_00576	ctg01_AA_00516ctg01_AA_00562											F.velutipes
ctg01_AA_00577												F.velutipes
ctg01_AA_00578	ctg06_AA_00745ctg01_AA_00566											F.velutipes
ctg01_AA_00579		XP_003027946.1	XP_001834354.2	XP_001888530.1 XP_001888575.1 XP_001888535.1	Pha_22694	XP_002468934.1					XP_965831.1	Dikarya
ctg01_AA_00580												F.velutipes
ctg01_AA_00581					Pha_65245							Agaricomycetes
ctg01_AA_00582												F.velutipes
ctg01_AA_00583												F.velutipes
ctg01_AA_00584	ctg02_AA_00026ctg13_AA_00066ctg13_AA_00085ctg29_AA_00784											F.velutipes
ctg01_AA_00585	ctg03_AA_00001ctg05_AA_00201ctg13_AA_00086ctg26_AA_00327ctg01_AA_00490											F.velutipes
ctg01_AA_00586	ctg13_AA_00099ctg13_AA_00474ctg13_AA_00771ctg01_AA_00219ctg01_AA_00496ctg01_AA_00536	XP_003033315.1 XP_003032911.1XP_003027665.1 XP_003027906.1			Pha_96879Pha_78172Pha_66268Pha_70314Pha_69852Pha_95861	XP_002471784.1						Agaricomycetes
ctg01_AA_00587												F.velutipes
ctg01_AA_00588	ctg13_AA_00087											F.velutipes
ctg01_AA_00589	ctg01_AA_00592ctg03_AA_00080ctg05_AA_01414ctg13_AA_00088ctg13_AA_00767	XP_003028620.1										Agaricales
ctg01_AA_00590	ctg01_AA_00604											F.velutipes
ctg01_AA_00591	ctg03_AA_00081ctg05_AA_01160ctg05_AA_01413											F.velutipes
ctg01_AA_00592	ctg03_AA_00080ctg05_AA_01414ctg13_AA_00088ctg13_AA_00767ctg01_AA_00589											F.velutipes
ctg01_AA_00593	ctg01_AA_00594ctg01_AA_00596ctg01_AA_00603ctg02_AA_00065ctg03_AA_01300ctg03_AA_01311ctg05_AA_00334ctg06_AA_00037ctg13_AA_00009ctg01_AA_00030ctg01_AA_00031ctg01_AA_00032ctg01_AA_00037ctg01_AA_00038ctg01_AA_00043ctg01_AA_00046ctg01_AA_00050ctg01_AA_00051ctg01_AA_00055ctg01_AA_00069ctg01_AA_00087ctg01_AA_00091ctg01_AA_00503ctg01_AA_00520ctg01_AA_00559											F.velutipes
ctg01_AA_00594	ctg01_AA_00596ctg01_AA_00603ctg05_AA_00334ctg13_AA_00009ctg01_AA_00503ctg01_AA_00520ctg01_AA_00593											F.velutipes
ctg01_AA_00595												F.velutipes
ctg01_AA_00596	ctg01_AA_00603ctg02_AA_00065ctg03_AA_01311ctg05_AA_00334ctg06_AA_00037ctg13_AA_00009ctg01_AA_00030ctg01_AA_00031ctg01_AA_00032ctg01_AA_00037ctg01_AA_00038ctg01_AA_00043ctg01_AA_00050ctg01_AA_00051ctg01_AA_00055ctg01_AA_00069ctg01_AA_00087ctg01_AA_00091ctg01_AA_00503ctg01_AA_00520ctg01_AA_00559ctg01_AA_00593ctg01_AA_00594											F.velutipes
ctg01_AA_00597	ctg01_AA_00598ctg01_AA_00604ctg01_AA_00605ctg01_AA_00606ctg01_AA_00609ctg01_AA_00610ctg01_AA_00611ctg01_AA_00617ctg02_AA_00020ctg02_AA_00047ctg02_AA_00049ctg02_AA_00074ctg03_AA_00016ctg03_AA_01111ctg05_AA_00013ctg05_AA_01788ctg06_AA_00003ctg06_AA_00005ctg06_AA_00006ctg06_AA_00007ctg06_AA_00292ctg06_AA_00293ctg06_AA_00296ctg06_AA_00732ctg06_AA_00735ctg06_AA_00736ctg06_AA_00739ctg06_AA_00758ctg06_A…											F.velutipes
ctg01_AA_00598	ctg01_AA_00604ctg01_AA_00605ctg01_AA_00606ctg01_AA_00609ctg01_AA_00610ctg01_AA_00611ctg01_AA_00617ctg02_AA_00018ctg02_AA_00020ctg02_AA_00047ctg02_AA_00049ctg02_AA_00074ctg03_AA_00016ctg03_AA_01111ctg05_AA_00013ctg05_AA_01383ctg05_AA_01788ctg05_AA_01834ctg06_AA_00003ctg06_AA_00005ctg06_AA_00006ctg06_AA_00007ctg06_AA_00292ctg06_AA_00293ctg06_AA_00296ctg06_AA_00735ctg06_AA_00736ctg06_AA_00739ctg06_A…											F.velutipes
ctg01_AA_00599												F.velutipes
ctg01_AA_00600		XP_003026562.1 XP_003026189.1										Agaricales
ctg01_AA_00601												F.velutipes
ctg01_AA_00602												F.velutipes
ctg01_AA_00603	ctg05_AA_00334ctg13_AA_00009ctg01_AA_00031ctg01_AA_00032ctg01_AA_00037ctg01_AA_00050ctg01_AA_00051ctg01_AA_00055ctg01_AA_00503ctg01_AA_00520ctg01_AA_00559ctg01_AA_00593ctg01_AA_00594ctg01_AA_00596											F.velutipes
ctg01_AA_00604	ctg01_AA_00605ctg01_AA_00606ctg01_AA_00609ctg01_AA_00610ctg01_AA_00611ctg01_AA_00617ctg02_AA_00047ctg02_AA_00049ctg02_AA_00074ctg03_AA_00016ctg03_AA_01111ctg05_AA_00013ctg05_AA_01788ctg06_AA_00003ctg06_AA_00005ctg06_AA_00006ctg06_AA_00007ctg06_AA_00292ctg06_AA_00293ctg06_AA_00296ctg06_AA_00732ctg06_AA_00735ctg06_AA_00736ctg06_AA_00739ctg06_AA_00757ctg06_AA_00758ctg06_AA_00771ctg06_AA_00794ctg11-2…											F.velutipes
ctg01_AA_00605	ctg01_AA_00606ctg01_AA_00611ctg02_AA_00047ctg02_AA_00049ctg02_AA_00074ctg03_AA_00016ctg03_AA_01111ctg05_AA_00013ctg05_AA_00880ctg05_AA_01788ctg05_AA_01834ctg06_AA_00003ctg06_AA_00005ctg06_AA_00006ctg06_AA_00007ctg06_AA_00292ctg06_AA_00293ctg06_AA_00739ctg06_AA_00747ctg06_AA_00758ctg06_AA_00771ctg06_AA_00783ctg06_AA_00794ctg11-2_AA_01525ctg13_AA_00022ctg13_AA_00029ctg13_AA_00037ctg13_AA_00053ctg13…											F.velutipes
ctg01_AA_00606	ctg01_AA_00609ctg01_AA_00610ctg01_AA_00611ctg01_AA_00617ctg02_AA_00018ctg02_AA_00020ctg02_AA_00047ctg02_AA_00049ctg02_AA_00074ctg03_AA_00016ctg03_AA_01111ctg05_AA_00013ctg05_AA_01834ctg06_AA_00003ctg06_AA_00005ctg06_AA_00006ctg06_AA_00007ctg06_AA_00292ctg06_AA_00293ctg06_AA_00296ctg06_AA_00732ctg06_AA_00735ctg06_AA_00739ctg06_AA_00757ctg06_AA_00771ctg11-2_AA_01514ctg11-2_AA_01517ctg11-2_AA_01525c…											F.velutipes
ctg01_AA_00607												F.velutipes
ctg01_AA_00608												F.velutipes
ctg01_AA_00609	ctg01_AA_00610ctg01_AA_00611ctg01_AA_00617ctg02_AA_00049ctg03_AA_00016ctg03_AA_01111ctg05_AA_00013ctg06_AA_00003ctg06_AA_00005ctg06_AA_00006ctg06_AA_00007ctg06_AA_00292ctg06_AA_00293ctg06_AA_00296ctg06_AA_00732ctg06_AA_00739ctg06_AA_00783ctg11-2_AA_01513ctg11-2_AA_01525ctg13_AA_00029ctg01_AA_00597ctg01_AA_00598ctg01_AA_00604ctg01_AA_00606											F.velutipes
ctg01_AA_00610	ctg01_AA_00611ctg01_AA_00617ctg02_AA_00020ctg02_AA_00049ctg02_AA_00074ctg03_AA_00016ctg03_AA_01111ctg05_AA_00013ctg05_AA_01788ctg05_AA_01834ctg06_AA_00003ctg06_AA_00005ctg06_AA_00006ctg06_AA_00007ctg06_AA_00292ctg06_AA_00293ctg06_AA_00296ctg06_AA_00735ctg06_AA_00739ctg06_AA_00758ctg06_AA_00771ctg06_AA_00794ctg11-2_AA_01427ctg11-2_AA_01514ctg11-2_AA_01525ctg13_AA_00053ctg01_AA_00597ctg01_AA_00598c…											F.velutipes
ctg01_AA_00611	ctg01_AA_00617ctg02_AA_00018ctg02_AA_00020ctg02_AA_00047ctg02_AA_00049ctg02_AA_00074ctg03_AA_01111ctg05_AA_00013ctg05_AA_00232ctg05_AA_01788ctg05_AA_01834ctg06_AA_00003ctg06_AA_00005ctg06_AA_00006ctg06_AA_00007ctg06_AA_00292ctg06_AA_00293ctg06_AA_00296ctg06_AA_00732ctg06_AA_00735ctg06_AA_00736ctg06_AA_00739ctg06_AA_00758ctg06_AA_00783ctg06_AA_00794ctg11-2_AA_01427ctg11-2_AA_01513ctg11-2_AA_01514c…											F.velutipes
ctg01_AA_00612												F.velutipes
ctg01_AA_00613	ctg13_AA_00702											F.velutipes
ctg01_AA_00614												F.velutipes
ctg01_AA_00615		XP_003028243.1	XP_001834393.1	XP_001888609.1	Pha_94538	XP_002471165.1						Agaricomycetes
ctg01_AA_00616												F.velutipes
ctg01_AA_00617	ctg02_AA_00049ctg02_AA_00074ctg03_AA_01111ctg03_AA_01115ctg05_AA_00013ctg05_AA_01834ctg06_AA_00003ctg06_AA_00005ctg06_AA_00006ctg06_AA_00007ctg06_AA_00292ctg06_AA_00293ctg06_AA_00296ctg06_AA_00731ctg06_AA_00736ctg06_AA_00739ctg06_AA_00757ctg06_AA_00758ctg06_AA_00771ctg06_AA_00794ctg11-2_AA_01513ctg11-2_AA_01525ctg01_AA_00597ctg01_AA_00598ctg01_AA_00604ctg01_AA_00606ctg01_AA_00609ctg01_AA_00610ctg…											F.velutipes
ctg01_AA_00618												F.velutipes
ctg01_AA_00619	ctg05_AA_00001											F.velutipes
ctg01_AA_00620	ctg11-2_AA_01626ctg01_AA_00360											F.velutipes
ctg01_AA_00621	ctg13_AA_00100											F.velutipes
ctg01_AA_00622	ctg03_AA_01107ctg11-1_AA_00651ctg11-2_AA_00866ctg13_AA_00101	XP_003027995.1										Agaricales
ctg01_AA_00623	ctg13_AA_00102											F.velutipes
ctg01_AA_00624		XP_003032465.1	XP_001831801.2	XP_001886485.1	Pha_99688	XP_002475082.1	XP_567572.1	XP_757197.1		XP_657780.1	XP_961978.1	Dikarya
ctg01_AA_00625												F.velutipes
ctg01_AA_00626			XP_001831802.2	XP_001886484.1								Agaricales
ctg01_AA_00627	ctg13_AA_00104											F.velutipes
ctg01_AA_00628	ctg13_AA_00105	XP_003033337.1	XP_001831768.2 XP_001834498.2	Lacc XP_001884233.1 Lacc XP_001887790.1	Pha_63418	XP_002474470.1 XP_002474462.1						Agaricomycetes
ctg01_AA_00629	ctg01_AA_00630ctg13_AA_00106ctg13_AA_00107											F.velutipes
ctg01_AA_00630	ctg13_AA_00106ctg13_AA_00107ctg01_AA_00629											F.velutipes
ctg01_AA_00631	ctg13_AA_00108ctg13_AA_00109	XP_003033336.1	XP_001831792.2	XP_001884217.1	Pha_66127Pha_66125		XP_567528.1	XP_760050.1	NP_014314.1	XP_657680.1	XP_960742.1	Dikarya
ctg01_AA_00632	ctg02_AA_00098ctg02_AA_00099ctg05_AA_01772ctg05_AA_01773ctg05_AA_01775ctg05_AA_01794ctg05_AA_01811ctg05_AA_01816ctg11-1_AA_00592ctg11-2_AA_00971ctg11-2_AA_00981ctg13_AA_00110											F.velutipes
ctg01_AA_00633	ctg13_AA_00111	XP_003028671.1	XP_001834558.2		Pha_69870	XP_002475787.1	XP_567527.1	XP_759425.1	NP_010660.1	XP_663309.1	XP_959553.1	Dikarya
ctg01_AA_00634	ctg13_AA_00112	XP_003026714.1	XP_002910185.1	XP_001879608.1	Pha_98963	XP_002476595.1	XP_572699.1			XP_662716.1	XP_957865.1	Dikarya
ctg01_AA_00635	ctg13_AA_00113		XP_001831793.2	XP_001884216.1								Agaricales
ctg01_AA_00636	ctg13_AA_00114	XP_003033338.1	XP_001831782.2	XP_001884214.1	Pha_63690	XP_002471052.1		XP_758565.1				Basidiomycota
ctg01_AA_00637	ctg13_AA_00115											F.velutipes
ctg01_AA_00638	ctg13_AA_00116											F.velutipes
ctg01_AA_00639	ctg13_AA_00117	XP_003030452.1	XP_001840335.2	XP_001884765.1	Pha_100512	XP_002474160.1 XP_002475044.1	XP_567098.1	XP_759172.1	NP_014551.1	XP_662610.1	XP_959643.1	Dikarya
ctg01_AA_00640	ctg13_AA_00118											F.velutipes
ctg01_AA_00641	ctg13_AA_00119		XP_001832418.2	XP_001873407.1								Agaricales
ctg01_AA_00642	ctg13_AA_00120	XP_003032821.1	XP_001831353.1									Agaricales
ctg01_AA_00643	ctg13_AA_00121ctg13_AA_00216											F.velutipes
ctg01_AA_00644												F.velutipes
ctg01_AA_00645	ctg13_AA_00123											F.velutipes
ctg01_AA_00646	ctg13_AA_00124	XP_003033343.1	XP_002910920.1		Pha_30366	XP_002472918.1	XP_566869.1	XP_760592.1	NP_009643.2	XP_660081.1	XP_961901.2	Dikarya
ctg01_AA_00647												F.velutipes
ctg01_AA_00648	ctg13_AA_00126											F.velutipes
ctg01_AA_00649	ctg13_AA_00127	XP_003033096.1	XP_001840065.2	XP_001885043.1	Pha_65808	XP_002477588.1	XP_567334.1	XP_756563.1	NP_011374.1	XP_661603.1	XP_960426.2	Dikarya
ctg01_AA_00650	ctg13_AA_00128ctg13_AA_00129	XP_003033332.1	XP_001831796.2		Pha_64784	XP_002472942.1XP_002475066.1	XP_570541.1	XP_759756.1	NP_009997.2	XP_657965.1	XP_964950.1	Dikarya
ctg01_AA_00651	ctg13_AA_00130		XP_001831816.2	XP_001876528.1		XP_002474585.1						Agaricomycetes
ctg01_AA_00652	ctg05_AA_01349ctg06_AA_00686ctg13_AA_00131	XP_003032497.1 XP_003029090.1	XP_001839681.2 XP_001839667.2 XP_001831815.2	XP_001882722.1XP_001876990.1XP_001888851.1	Pha_76180		XP_567361.1	XP_762036.1	NP_014257.1	XP_658785.1	XP_961677.1	Dikarya
ctg01_AA_00653	ctg13_AA_00132		XP_001833017.1	XP_001873526.1	Pha_78375						XP_964283.1	Dikarya
ctg01_AA_00654												F.velutipes
ctg01_AA_00655												F.velutipes
ctg01_AA_00656	ctg13_AA_00135	XP_003038180.1		Lacc XP_001884211.1 Lacc XP_001884122.1	Pha_64783		XP_568705.1	XP_761983.1		XP_664024.1		Dikarya
ctg01_AA_00657	ctg13_AA_00137	XP_003026309.1	XP_001829470.1	XP_001873564.1	Pha_63686						XP_961951.2	Dikarya
ctg01_AA_00658	ctg13_AA_00138											F.velutipes
ctg01_AA_00659												F.velutipes
ctg01_AA_00660	ctg13_AA_00140	XP_003028328.1	XP_001839882.2 XP_001833957.2 XP_001833886.1	XP_001879951.1 XP_001879946.1 XP_001879820.1	Pha_78124Pha_69193		XP_568407.1					Basidiomycota
ctg01_AA_00661	ctg13_AA_00141	XP_003028736.1	XP_001839720.2		Pha_67450Pha_78129	XP_002471574.1 XP_002469355.1		XP_761733.1		XP_682632.1 XP_662136.1 XP_658368.1	XP_964343.2XP_955806.1	Dikarya
ctg01_AA_00662	ctg11-2_AA_00660ctg13_AA_00142											F.velutipes
ctg01_AA_00663	ctg13_AA_00143	XP_003033331.1	XP_001831749.2	XP_001883697.1	Pha_22912		XP_567330.1	XP_757082.1	NP_011614.1	XP_681053.1	XP_965821.1	Dikarya
ctg01_AA_00664												F.velutipes
ctg01_AA_00665	ctg13_AA_00145											F.velutipes
ctg01_AA_00666	ctg13_AA_00146											F.velutipes
ctg01_AA_00667	ctg13_AA_00147	XP_003026662.1			Pha_70763	XP_002477751.1						Agaricomycetes
ctg01_AA_00668												F.velutipes
ctg01_AA_00669												F.velutipes
ctg01_AA_00670	ctg13_AA_00149	XP_003032743.1 XP_003035628.1		XP_001883812.1	Pha_64791		XP_567265.1	XP_760055.1 XP_761540.1		XP_663145.1 XP_663144.1 XP_658102.1	XP_958596.1	Dikarya
ctg01_AA_00671	ctg13_AA_00150											F.velutipes
ctg01_AA_00672	ctg13_AA_00151											F.velutipes
ctg01_AA_00673	ctg13_AA_00152	XP_003032198.1	XP_001831653.1	XP_001884118.1	Pha_71732							Agaricomycetes
ctg01_AA_00674	ctg06_AA_00323ctg06_AA_00324ctg06_AA_00478ctg06_AA_00487ctg11-1_AA_00690ctg11-1_AA_00694ctg11-1_AA_00979ctg11-1_AA_00982ctg11-1_AA_00984ctg11-1_AA_01378ctg11-1_AA_01386ctg11-2_AA_00982ctg11-2_AA_01218ctg13_AA_00153ctg13_AA_00518ctg13_AA_00737ctg29_AA_00171ctg29_AA_00177ctg29_AA_00178ctg29_AA_00203ctg29_AA_00602ctg29_AA_00650ctg29_AA_00701ctg29_AA_00794ctg29_AA_00821ctg29_AA_00835ctg29_AA_00839ctg…											F.velutipes
ctg01_AA_00675	ctg13_AA_00154	XP_003032719.1	XP_001831708.2	XP_001884089.1	Pha_31589	XP_002475063.1		XP_760760.1	NP_014305.1	XP_658209.1	XP_001728502.1	Dikarya
ctg01_AA_00676	ctg13_AA_00696		XP_001831979.2	XP_001890271.1	Pha_78705	XP_002474062.1 XP_002476709.1						Agaricomycetes
ctg01_AA_00677	ctg13_AA_00155	XP_003030953.1 XP_003032396.1		XP_001888630.1	Pha_78437	XP_002476539.1	XP_570914.1 XP_567873.1			XP_663928.1XP_661006.1XP_659622.1	XP_959674.1XP_964065.1	Dikarya
ctg01_AA_00678	ctg01_AA_00681ctg11-1_AA_00598ctg11-1_AA_00599ctg11-2_AA_00556ctg11-2_AA_01491ctg13_AA_00154ctg29_AA_00239ctg29_AA_00508ctg29_AA_00529ctg29_AA_00769ctg01_AA_00081	XP_003034905.1	XP_001833948.1 XP_001833187.2 XP_001830928.2	XP_001879698.1 XP_001875428.1	Pha_71062		XP_572303.1	XP_758990.1	NP_014161.1	XP_661187.1	XP_965319.1	Dikarya
ctg01_AA_00679		XP_003035139.1	XP_001834598.2	XP_001882740.1	Pha_67636		XP_572811.1	XP_761297.1				Basidiomycota
ctg01_AA_00680												F.velutipes
ctg01_AA_00681	ctg11-1_AA_00598ctg11-1_AA_00599ctg11-1_AA_00846ctg11-2_AA_00556ctg11-2_AA_01491ctg29_AA_00239ctg29_AA_00508ctg29_AA_00529ctg29_AA_00696ctg01_AA_00081ctg01_AA_00678											F.velutipes
ctg01_AA_00682	ctg13_AA_00157											F.velutipes
ctg01_AA_00683	ctg13_AA_00158											F.velutipes
ctg01_AA_00684	ctg13_AA_00159	XP_003033327.1	XP_001831761.1	XP_001883708.1	Pha_64795	XP_002472925.1	XP_566910.1	XP_757170.1	NP_013839.1 NP_013128.1	XP_662068.1	XP_964054.1	Dikarya
ctg01_AA_00685	ctg02_AA_00216ctg13_AA_00160											F.velutipes
ctg01_AA_00686	ctg13_AA_00161	XP_003027076.1	XP_001838566.1		Pha_96387	XP_002471557.1 XP_002474692.1		XP_757957.1				Basidiomycota
ctg01_AA_00687	ctg13_AA_00162											F.velutipes
ctg01_AA_00688	ctg13_AA_00163											F.velutipes
ctg01_AA_00689	ctg13_AA_00164	XP_003026515.1	XP_002911227.1	XP_001879103.1						XP_868844.1	XP_960698.1	Dikarya
ctg01_AA_00690	ctg13_AA_00165	XP_003026753.1				XP_002468714.1						Agaricomycetes
ctg01_AA_00691	ctg13_AA_00166	XP_003030687.1	XP_001833832.2		Pha_24439	XP_002469716.1				XP_682160.1 XP_682030.1	XP_962601.2	Dikarya
ctg01_AA_00692												F.velutipes
ctg01_AA_00693												F.velutipes
ctg01_AA_00694	ctg13_AA_00169	XP_003032720.1	XP_001831713.1	XP_001883806.1	Pha_100499		XP_567133.1	XP_760227.1	NP_014847.1 NP_015206.1	XP_662070.1	XP_960926.2	Dikarya
ctg01_AA_00695	ctg13_AA_00170	XP_003026593.1	XP_001828368.2		Pha_99763		XP_572638.1	XP_759638.1		XP_661227.1	XP_965245.1	Dikarya
ctg01_AA_00696	ctg13_AA_00171											F.velutipes
ctg01_AA_00697	ctg13_AA_00172	XP_003035232.1	XP_001830808.2 XP_001837682.1	XP_001878721.1	Pha_67545	XP_002469333.1 XP_002475302.1			NP_014727.1			Dikarya
ctg01_AA_00698												F.velutipes
ctg01_AA_00699												F.velutipes
ctg01_AA_00700	ctg13_AA_00174											F.velutipes
ctg01_AA_00701	ctg13_AA_00175ctg13_AA_00176											F.velutipes
ctg01_AA_00702	ctg13_AA_00177											F.velutipes
ctg01_AA_00703	ctg13_AA_00178	XP_003033294.1	XP_001831702.1	XP_001883680.1	Pha_75978	XP_002469155.1						Agaricomycetes
ctg01_AA_00704	ctg13_AA_00179		XP_001831701.2	XP_001883800.1								Agaricales
ctg01_AA_00705												F.velutipes
ctg01_AA_00706												F.velutipes
ctg01_AA_00707												F.velutipes
ctg01_AA_00708	ctg13_AA_00182ctg13_AA_00183	XP_003033865.1	XP_001840153.1	XP_001889732.1	Pha_65561Pha_65567		XP_570340.1	XP_758020.1	NP_015222.1	XP_660736.1	XP_962125.1	Dikarya
ctg01_AA_00709	ctg13_AA_00184	XP_003031059.1 XP_003037985.1	XP_001837975.1			XP_002469069.1	XP_566940.1			XP_661464.1 XP_658645.1	XP_958254.1	Dikarya
ctg01_AA_00710		XP_003037628.1	XP_001837483.2 XP_001828970.2	XP_001879762.1	Pha_64940 Pha_30566	XP_002470594.1 XP_002475003.1	XP_570949.1			XP_664016.1 XP_663991.1		Dikarya
ctg01_AA_00711												F.velutipes
ctg01_AA_00712												F.velutipes
ctg01_AA_00713	ctg11-1_AA_01430ctg11-2_AA_01104											F.velutipes
ctg01_AA_00714												F.velutipes
ctg01_AA_00715	ctg13_AA_00189	XP_003032738.1	XP_001831725.1		Pha_79316		XP_568962.1	XP_759014.1	NP_015266.1	XP_661908.1	XP_960860.1	Dikarya
ctg01_AA_00716	ctg13_AA_00191ctg29_AA_00839ctg29_AA_00840	XP_003033292.1	XP_001831698.1	XP_001883797.1	Pha_75973	XP_002469154.1						Agaricomycetes
ctg01_AA_00717	ctg05_AA_00995ctg11-2_AA_00885ctg11-2_AA_01684ctg13_AA_00192ctg33_AA_00215	XP_003027636.1	XP_001834799.2			XP_002475614.1						Agaricomycetes
ctg01_AA_00718	ctg11-2_AA_01643ctg13_AA_00193											F.velutipes
ctg01_AA_00719												F.velutipes
ctg01_AA_00720	ctg01_AA_00722ctg13_AA_00195ctg13_AA_00197											F.velutipes
ctg01_AA_00721	ctg13_AA_00196											F.velutipes
ctg01_AA_00722	ctg13_AA_00195ctg13_AA_00197ctg01_AA_00720	XP_003032529.1	XP_001830917.2		Pha_66818	XP_002470661.1				XP_682489.1		Dikarya
ctg01_AA_00723	ctg13_AA_00198											F.velutipes
ctg01_AA_00724	ctg13_AA_00199											F.velutipes
ctg01_AA_00725	ctg13_AA_00200											F.velutipes
ctg01_AA_00726	ctg13_AA_00201											F.velutipes
ctg01_AA_00727	ctg13_AA_00202	XP_003032704.1	XP_001831689.1	XP_001883667.1	Pha_79318		XP_570386.1	XP_761019.1	NP_014583.2	XP_659487.1	XP_963976.1	Dikarya
ctg01_AA_00728	ctg06_AA_00426ctg06_AA_00428ctg06_AA_00433ctg06_AA_00464ctg11-2_AA_00988ctg13_AA_00203ctg13_AA_01016ctg29_AA_00660ctg01_AA_00162											F.velutipes
ctg01_AA_00729												F.velutipes
ctg01_AA_00730												F.velutipes
ctg01_AA_00731	ctg13_AA_00206	XP_003027707.1 XP_003031062.1 XP_003031061.1 XP_003029356.1	XP_001839261.1	XP_001885770.1	Pha_63610Pha_74517	XP_002471651.1	XP_569173.1			XP_681075.1XP_664522.1XP_664054.1	XP_958733.1	Dikarya
ctg01_AA_00732	ctg13_AA_00207											F.velutipes
ctg01_AA_00733												F.velutipes
ctg01_AA_00734	ctg13_AA_00209											F.velutipes
ctg01_AA_00735		XP_003026846.1	XP_001835082.2		Pha_77383			XP_761475.1		XP_661703.1	XP_961701.2	Dikarya
ctg01_AA_00736	ctg01_AA_00737											F.velutipes
ctg01_AA_00737	ctg01_AA_00736											F.velutipes
ctg01_AA_00738	ctg13_AA_00212							XP_760855.1		XP_662486.1		Dikarya
ctg01_AA_00739												F.velutipes
ctg01_AA_00740												F.velutipes
ctg01_AA_00741												F.velutipes
ctg01_AA_00742												F.velutipes
ctg02_AA_00001	ctg11-1_AA_00678											F.velutipes
ctg02_AA_00002												F.velutipes
ctg02_AA_00003												F.velutipes
ctg02_AA_00004	ctg11-1_AA_00484											F.velutipes
ctg02_AA_00005	ctg02_AA_00019ctg11-1_AA_00476											F.velutipes
ctg02_AA_00006	ctg06_AA_00225ctg11-1_AA_00619ctg13_AA_00765ctg29_AA_00842											F.velutipes
ctg02_AA_00007	ctg06_AA_00225ctg11-1_AA_00619ctg11-1_AA_00656ctg11-1_AA_00671ctg13_AA_00475ctg13_AA_00765											F.velutipes
ctg02_AA_00008												F.velutipes
ctg02_AA_00009												F.velutipes
ctg02_AA_00010	ctg02_AA_00011											F.velutipes
ctg02_AA_00011	ctg02_AA_00010											F.velutipes
ctg02_AA_00012	ctg02_AA_00044											F.velutipes
ctg02_AA_00013	ctg11-1_AA_00477											F.velutipes
ctg02_AA_00014	ctg11-1_AA_00480	XP_003031168.1	XP_001833782.2	XP_001882025.1								Agaricales
ctg02_AA_00015	ctg02_AA_00038ctg05_AA_00184											F.velutipes
ctg02_AA_00016												F.velutipes
ctg02_AA_00017												F.velutipes
ctg02_AA_00018	ctg02_AA_00020ctg02_AA_00049ctg05_AA_00013ctg06_AA_00003ctg06_AA_00005ctg06_AA_00006ctg06_AA_00007ctg06_AA_00293ctg06_AA_00735ctg06_AA_00736ctg06_AA_00739ctg06_AA_00758ctg06_AA_00771ctg13_AA_00053ctg01_AA_00598ctg01_AA_00606ctg01_AA_00611											F.velutipes
ctg02_AA_00019	ctg05_AA_01796ctg11-1_AA_00476ctg13_AA_00421ctg02_AA_00005											F.velutipes
ctg02_AA_00020	ctg02_AA_00049ctg02_AA_00074ctg03_AA_00016ctg03_AA_01111ctg05_AA_00013ctg05_AA_01383ctg05_AA_01788ctg06_AA_00003ctg06_AA_00005ctg06_AA_00006ctg06_AA_00007ctg06_AA_00292ctg06_AA_00293ctg06_AA_00296ctg06_AA_00732ctg06_AA_00735ctg06_AA_00739ctg06_AA_00757ctg06_AA_00758ctg06_AA_00771ctg06_AA_00794ctg11-2_AA_01517ctg11-2_AA_01525ctg13_AA_00022ctg13_AA_00029ctg13_AA_00053ctg13_AA_00054ctg26_AA_00032ctg…											F.velutipes
ctg02_AA_00021												F.velutipes
ctg02_AA_00022	ctg29_AA_00781											F.velutipes
ctg02_AA_00023	ctg11-1_AA_01399ctg29_AA_00782											F.velutipes
ctg02_AA_00024	ctg29_AA_00782											F.velutipes
ctg02_AA_00025	ctg06_AA_00539ctg06_AA_00609ctg11-1_AA_01401ctg29_AA_00783ctg33_AA_01196											F.velutipes
ctg02_AA_00026	ctg11-1_AA_01402ctg29_AA_00784ctg01_AA_00584											F.velutipes
ctg02_AA_00027												F.velutipes
ctg02_AA_00028												F.velutipes
ctg02_AA_00029	ctg02_AA_00036											F.velutipes
ctg02_AA_00030												F.velutipes
ctg02_AA_00031												F.velutipes
ctg02_AA_00032												F.velutipes
ctg02_AA_00033												F.velutipes
ctg02_AA_00034	ctg03_AA_00237ctg06_AA_00134ctg06_AA_00248ctg06_AA_00560ctg11-1_AA_00625ctg11-2_AA_01611ctg13_AA_00659	XP_003029013.1	XP_001836620.2	XP_001878170.1XP_001887224.1XP_001887016.1	Pha_97083Pha_97424Pha_97302Pha_95686		XP_567971.1		NP_012184.1	XP_660220.1		Dikarya
ctg02_AA_00035	ctg26_AA_00460											F.velutipes
ctg02_AA_00036	ctg02_AA_00029											F.velutipes
ctg02_AA_00037	ctg13_AA_00540											F.velutipes
ctg02_AA_00038	ctg05_AA_00184ctg02_AA_00015			XP_001874684.1								Agaricales
ctg02_AA_00039												F.velutipes
ctg02_AA_00040												F.velutipes
ctg02_AA_00041												F.velutipes
ctg02_AA_00042	ctg01_AA_00520											F.velutipes
ctg02_AA_00043												F.velutipes
ctg02_AA_00044	ctg02_AA_00012											F.velutipes
ctg02_AA_00045		XP_003026177.1	XP_001837330.2	XP_001876778.1			XP_568573.1					Basidiomycota
ctg02_AA_00046	ctg02_AA_00048ctg06_AA_00044ctg06_AA_00107ctg06_AA_00465ctg26_AA_00204											F.velutipes
ctg02_AA_00047	ctg02_AA_00049ctg02_AA_00074ctg03_AA_00016ctg03_AA_00026ctg03_AA_01111ctg05_AA_00013ctg05_AA_01788ctg05_AA_01834ctg06_AA_00003ctg06_AA_00005ctg06_AA_00006ctg06_AA_00007ctg06_AA_00293ctg06_AA_00731ctg06_AA_00732ctg06_AA_00739ctg06_AA_00747ctg06_AA_00758ctg06_AA_00783ctg06_AA_00794ctg11-2_AA_01525ctg11-2_AA_01529ctg13_AA_00022ctg13_AA_00029ctg13_AA_00037ctg13_AA_00053ctg13_AA_00054ctg13_AA_00918ctg…											F.velutipes
ctg02_AA_00048	ctg06_AA_00107ctg02_AA_00046											F.velutipes
ctg02_AA_00049	ctg02_AA_00074ctg03_AA_00016ctg03_AA_01111ctg03_AA_01115ctg05_AA_00013ctg05_AA_01788ctg05_AA_01834ctg06_AA_00003ctg06_AA_00005ctg06_AA_00006ctg06_AA_00007ctg06_AA_00292ctg06_AA_00293ctg06_AA_00296ctg06_AA_00732ctg06_AA_00735ctg06_AA_00736ctg06_AA_00739ctg06_AA_00746ctg06_AA_00758ctg06_AA_00771ctg06_AA_00783ctg06_AA_00794ctg11-2_AA_01517ctg11-2_AA_01525ctg13_AA_00022ctg13_AA_00029ctg13_AA_00037ctg…	XP_003031898.1										Agaricales
ctg02_AA_00050	ctg11-1_AA_00475											F.velutipes
ctg02_AA_00051	ctg11-2_AA_01526ctg13_AA_00061ctg29_AA_00041											F.velutipes
ctg02_AA_00052												F.velutipes
ctg02_AA_00053												F.velutipes
ctg02_AA_00054												F.velutipes
ctg02_AA_00055		XP_003038161.1	XP_001837346.2		Pha_72855 Pha_72856	XP_002470330.1	XP_569962.1					Basidiomycota
ctg02_AA_00056												F.velutipes
ctg02_AA_00057												F.velutipes
ctg02_AA_00058												F.velutipes
ctg02_AA_00059		XP_003038163.1	XP_001837343.1	XP_001877206.1	Pha_27651		XP_572123.1	XP_756770.1				Basidiomycota
ctg02_AA_00060		XP_003038164.1	XP_001837342.1	XP_001877207.1	Pha_72860		XP_569260.1				XP_961985.1	Dikarya
ctg02_AA_00061	ctg13_AA_00003ctg13_AA_00006											F.velutipes
ctg02_AA_00062												F.velutipes
ctg02_AA_00063	ctg11-2_AA_00785ctg29_AA_00907											F.velutipes
ctg02_AA_00064	ctg02_AA_00071											F.velutipes
ctg02_AA_00065	ctg05_AA_00334ctg06_AA_00037ctg13_AA_00009ctg01_AA_00030ctg01_AA_00031ctg01_AA_00032ctg01_AA_00038ctg01_AA_00043ctg01_AA_00050ctg01_AA_00051ctg01_AA_00055ctg01_AA_00069ctg01_AA_00087ctg01_AA_00091ctg01_AA_00503ctg01_AA_00520ctg01_AA_00559ctg01_AA_00593ctg01_AA_00596											F.velutipes
ctg02_AA_00066		XP_003032369.1	XP_001835525.1 XP_001835526.2	XP_001887032.1								Agaricales
ctg02_AA_00067												F.velutipes
ctg02_AA_00068												F.velutipes
ctg02_AA_00069												F.velutipes
ctg02_AA_00070	ctg11-2_AA_00866											F.velutipes
ctg02_AA_00071	ctg02_AA_00064											F.velutipes
ctg02_AA_00072												F.velutipes
ctg02_AA_00073												F.velutipes
ctg02_AA_00074	ctg02_AA_00075ctg03_AA_00016ctg03_AA_00026ctg03_AA_01111ctg05_AA_00013ctg05_AA_01383ctg05_AA_01788ctg05_AA_01834ctg06_AA_00003ctg06_AA_00005ctg06_AA_00006ctg06_AA_00007ctg06_AA_00021ctg06_AA_00292ctg06_AA_00293ctg06_AA_00296ctg06_AA_00732ctg06_AA_00735ctg06_AA_00736ctg06_AA_00739ctg06_AA_00757ctg06_AA_00758ctg06_AA_00771ctg06_AA_00783ctg06_AA_00794ctg11-2_AA_01427ctg11-2_AA_01513ctg11-2_AA_01525c…											F.velutipes
ctg02_AA_00075	ctg02_AA_00074											F.velutipes
ctg02_AA_00076	ctg02_AA_00080ctg11-1_AA_00272ctg11-2_AA_00867											F.velutipes
ctg02_AA_00077												F.velutipes
ctg02_AA_00078												F.velutipes
ctg02_AA_00079	ctg11-1_AA_00375ctg13_AA_00015			XP_001885710.1	Pha_73114	XP_002474149.1 XP_002474980.1						Agaricomycetes
ctg02_AA_00080	ctg05_AA_00314ctg11-2_AA_00867ctg02_AA_00076											F.velutipes
ctg02_AA_00081	ctg05_AA_00015ctg05_AA_00471ctg13_AA_00018ctg26_AA_00012ctg33_AA_00037ctg33_AA_00044ctg33_AA_00064											F.velutipes
ctg02_AA_00082	ctg13_AA_00003											F.velutipes
ctg02_AA_00083												F.velutipes
ctg02_AA_00084	ctg06_AA_00785ctg01_AA_00026											F.velutipes
ctg02_AA_00085	ctg26_AA_00045	XP_003028192.1	XP_001833919.1		Pha_69198	XP_002472783.1	XP_571398.1	XP_757040.1			XP_958578.1	Dikarya
ctg02_AA_00086												F.velutipes
ctg02_AA_00087												F.velutipes
ctg02_AA_00088	ctg02_AA_00095ctg11-2_AA_00871ctg11-2_AA_00909ctg11-2_AA_00921											F.velutipes
ctg02_AA_00089	ctg02_AA_00091											F.velutipes
ctg02_AA_00090			XP_001839711.1									Agaricales
ctg02_AA_00091	ctg05_AA_00472ctg02_AA_00089											F.velutipes
ctg02_AA_00092												F.velutipes
ctg02_AA_00093												F.velutipes
ctg02_AA_00094												F.velutipes
ctg02_AA_00095	ctg11-2_AA_00871ctg02_AA_00088											F.velutipes
ctg02_AA_00096												F.velutipes
ctg02_AA_00097	ctg11-2_AA_00909ctg11-2_AA_00921											F.velutipes
ctg02_AA_00098	ctg02_AA_00099ctg05_AA_01772ctg05_AA_01773ctg05_AA_01775ctg05_AA_01794ctg05_AA_01816ctg11-2_AA_00971ctg11-2_AA_00981ctg13_AA_00110ctg01_AA_00632											F.velutipes
ctg02_AA_00099	ctg05_AA_01772ctg05_AA_01773ctg05_AA_01775ctg05_AA_01794ctg05_AA_01811ctg05_AA_01816ctg11-2_AA_00971ctg11-2_AA_00981ctg13_AA_00110ctg01_AA_00632ctg02_AA_00098											F.velutipes
ctg02_AA_00100												F.velutipes
ctg02_AA_00101	ctg05_AA_00308ctg05_AA_00326ctg05_AA_00328ctg05_AA_00330											F.velutipes
ctg02_AA_00102												F.velutipes
ctg02_AA_00103	ctg13_AA_00099ctg13_AA_00771ctg01_AA_00496ctg01_AA_00536	XP_003026563.1										Agaricales
ctg02_AA_00104	ctg05_AA_00415ctg06_AA_00228ctg11-2_AA_00081ctg11-2_AA_00875ctg11-2_AA_01526ctg13_AA_00062ctg29_AA_00042											F.velutipes
ctg02_AA_00105		XP_003036796.1	XP_002911238.1	XP_001876770.1	Pha_72927		XP_566563.1 XP_566562.1 XP_566564.1	XP_758268.1	NP_013349.1	XP_662087.1	XP_959156.1	Dikarya
ctg02_AA_00106												F.velutipes
ctg02_AA_00107		XP_003036797.1	XP_001837357.1	XP_001877200.1	Pha_65715		XP_569295.1	XP_756511.1	NP_011605.1	XP_658864.1	XP_965101.1	Dikarya
ctg02_AA_00108	ctg02_AA_00281											F.velutipes
ctg02_AA_00109	ctg02_AA_00511ctg03_AA_00179ctg03_AA_01262ctg05_AA_00348ctg05_AA_00941ctg05_AA_00946ctg05_AA_00973ctg05_AA_00981ctg05_AA_00984ctg06_AA_00163ctg11-2_AA_00011ctg11-2_AA_00564ctg29_AA_00138											F.velutipes
ctg02_AA_00110												F.velutipes
ctg02_AA_00111												F.velutipes
ctg02_AA_00112												F.velutipes
ctg02_AA_00113												F.velutipes
ctg02_AA_00114												F.velutipes
ctg02_AA_00115		XP_003038166.1	XP_001837340.2	XP_001876776.1	Pha_72864		XP_568343.1	XP_758025.1			XP_959557.1	Dikarya
ctg02_AA_00116		XP_003034449.1 XP_003036817.1	XP_002911236.1	XP_001877208.1		XP_002470331.1						Agaricomycetes
ctg02_AA_00117		XP_003038165.1	XP_001837336.1	XP_001876777.1	Pha_72866		XP_572901.1	XP_756835.1	NP_010703.1	XP_664639.1	XP_957048.1	Dikarya
ctg02_AA_00118	ctg02_AA_00119	XP_003038390.1	XP_001829244.2		Pha_94692	XP_002473971.1	XP_570825.1	XP_759294.1	NP_015129.1	XP_681560.1	XP_959195.1	Dikarya
ctg02_AA_00119	ctg02_AA_00118	XP_003038390.1	XP_001829244.2		Pha_94692	XP_002473971.1	XP_570825.1	XP_759294.1	NP_015129.1	XP_681560.1	XP_959195.1	Dikarya
ctg02_AA_00120		XP_003038160.1		XP_001877204.1	Pha_72869							Agaricomycetes
ctg02_AA_00121												F.velutipes
ctg02_AA_00122		XP_003036802.1	XP_001837349.2		Pha_72851	XP_002477483.1	XP_569270.1	XP_761845.1	NP_014445.1	XP_657748.1	XP_956475.1	Dikarya
ctg02_AA_00123		XP_003036801.1	XP_001837350.2	XP_001877203.1	Pha_72846	XP_002469515.1	XP_569266.1					Basidiomycota
ctg02_AA_00124				XP_001878468.1	Pha_26297							Agaricomycetes
ctg02_AA_00125	ctg05_AA_00269ctg05_AA_01217ctg11-2_AA_00533ctg11-2_AA_01305ctg11-2_AA_01307ctg11-2_AA_01313ctg11-2_AA_01327											F.velutipes
ctg02_AA_00126	ctg05_AA_01217ctg11-2_AA_01307ctg11-2_AA_01313ctg11-2_AA_01327											F.velutipes
ctg02_AA_00127												F.velutipes
ctg02_AA_00128		XP_003038153.1	XP_001837353.2	XP_001876771.1	Pha_72836							Agaricomycetes
ctg02_AA_00129		XP_003036800.1	XP_001837351.2				XP_571574.1	XP_762567.1				Basidiomycota
ctg02_AA_00130		XP_003036844.1	XP_002911151.1	XP_001874725.1	Pha_63925	XP_002470122.1	XP_571196.1	XP_759136.1	NP_011323.1			Dikarya
ctg02_AA_00131		XP_003035670.1	XP_001837530.2	XP_001876553.1	Pha_79122	XP_002476431.1	XP_568518.1	XP_760898.1	NP_014937.1	XP_661349.1	XP_963880.1	Dikarya
ctg02_AA_00132		XP_003035692.1	XP_001838296.1 XP_002911260.1	XP_001877010.1	Pha_79123		XP_571527.1	XP_760941.1	NP_015411.1	XP_662532.1	XP_962143.1	Dikarya
ctg02_AA_00133		XP_003026035.1	XP_001834833.2	XP_001875731.1	Pha_66757		XP_568274.1 XP_568273.1	XP_761981.1	NP_015322.1	XP_660045.1	XP_962710.1	Dikarya
ctg02_AA_00134												F.velutipes
ctg02_AA_00135		XP_003038285.1	XP_001837323.1	XP_001877217.1	Pha_97929		XP_570728.1	XP_762564.1	NP_012635.1	XP_662752.1	XP_958879.1	Dikarya
ctg02_AA_00136	ctg06_AA_00733ctg06_AA_00743ctg06_AA_00769ctg06_AA_00772ctg06_AA_00788											F.velutipes
ctg02_AA_00137		XP_003036803.1	XP_001837333.1	XP_001877213.1	Pha_27688		XP_566619.1	XP_762157.1	NP_011506.1	XP_663490.1	XP_957462.1	Dikarya
ctg02_AA_00138		XP_003035031.1	XP_001836599.1 XP_001839739.2	XP_001882726.1		XP_002474542.1	XP_570093.1 XP_568590.1	XP_759654.1	NP_011776.1	XP_682279.1 XP_682224.1	XP_960645.1 XP_001728106.1 XP_963279.2	Dikarya
ctg02_AA_00139			XP_002910807.1									Agaricales
ctg02_AA_00140												F.velutipes
ctg02_AA_00141		XP_003036819.1	XP_001836971.2	XP_001884263.1	Pha_72839							Agaricomycetes
ctg02_AA_00142	ctg02_AA_00150ctg02_AA_00151											F.velutipes
ctg02_AA_00143	ctg11-2_AA_01184ctg11-2_AA_01194ctg11-2_AA_01195ctg11-2_AA_01196ctg11-2_AA_01197ctg11-2_AA_01199ctg11-2_AA_01202ctg11-2_AA_01210ctg11-2_AA_01213											F.velutipes
ctg02_AA_00144		XP_003038282.1	XP_001837324.1	XP_001876782.1	Pha_72987	XP_002473673.1	XP_568853.1	XP_758320.1	NP_009890.1	XP_681958.1	XP_964736.1	Dikarya
ctg02_AA_00145	ctg05_AA_00995ctg11-2_AA_00815ctg11-2_AA_00885ctg11-2_AA_01684ctg33_AA_00215	XP_003038273.1	XP_002911232.1	XP_001877219.1				XP_760697.1				Basidiomycota
ctg02_AA_00146		XP_003036917.1	XP_001837325.1	XP_001876781.1	Pha_27734		XP_568950.1	XP_762596.1	NP_012909.1	XP_664235.1	XP_965776.1	Dikarya
ctg02_AA_00147												F.velutipes
ctg02_AA_00148												F.velutipes
ctg02_AA_00149												F.velutipes
ctg02_AA_00150	ctg02_AA_00142											F.velutipes
ctg02_AA_00151	ctg02_AA_00142											F.velutipes
ctg02_AA_00152		XP_003033256.1	XP_001836852.2		Pha_78739	XP_002474052.1	XP_572461.1	XP_756275.1	NP_009612.1			Dikarya
ctg02_AA_00153		XP_003036919.1	XP_001837322.1	XP_001876783.1	Pha_72975		XP_566824.1	XP_761843.1	NP_014746.2	XP_661635.1	XP_959160.1	Dikarya
ctg02_AA_00154												F.velutipes
ctg02_AA_00155		XP_003030977.1	XP_002911014.1	XP_001878812.1	Pha_76970		XP_570005.1	XP_761318.1	NP_014143.2	XP_663636.1	XP_957887.2	Dikarya
ctg02_AA_00156		XP_003036906.1	XP_001837386.2	XP_001886955.1	Pha_72918		XP_571340.1	XP_762542.1	NP_012226.1	XP_662189.1	XP_955865.1	Dikarya
ctg02_AA_00157		XP_003038269.1	XP_001837387.2	XP_001887039.1	Pha_72917	XP_002470393.1	XP_571273.1	XP_761207.1	NP_011447.1	XP_659661.1	XP_957360.1	Dikarya
ctg02_AA_00158			XP_001837388.2									Agaricales
ctg02_AA_00159												F.velutipes
ctg02_AA_00160												F.velutipes
ctg02_AA_00161		XP_003038266.1	XP_001837389.2	XP_001886956.1								Agaricales
ctg02_AA_00162	ctg02_AA_00181	XP_003034135.1 XP_003038265.1	XP_001837810.2 XP_001837390.1 XP_001837807.2	XP_001886957.1	Pha_63400Pha_100530Pha_100531					XP_659205.1		Dikarya
ctg02_AA_00163		XP_003038268.1	XP_001837385.2		Pha_72919		XP_567831.1 XP_567832.1	XP_761858.1	NP_009759.1	XP_664634.1	XP_962335.1	Dikarya
ctg02_AA_00164		XP_003038100.1	XP_001840407.1	XP_001887316.1	Pha_74618		XP_567548.1	XP_759907.1	NP_014271.1			Dikarya
ctg02_AA_00165												F.velutipes
ctg02_AA_00166												F.velutipes
ctg02_AA_00167												F.velutipes
ctg02_AA_00168												F.velutipes
ctg02_AA_00169		XP_003038263.1	XP_001837392.1	XP_001886960.1	Pha_97891		XP_568749.1	XP_762306.1	NP_010332.1	XP_660337.1	XP_964266.2	Dikarya
ctg02_AA_00170		XP_003036920.1	XP_001837320.1	XP_001876784.1	Pha_65717		XP_568967.1	XP_761860.1	NP_011665.1	XP_660544.1	XP_961410.1	Dikarya
ctg02_AA_00171		XP_003033451.1 XP_003030150.1	XP_001835861.1 XP_002911661.1	XP_001875851.1 XP_001880427.1	Pha_25776		XP_567344.1	XP_756344.1		XP_680889.1	XP_956324.2	Dikarya
ctg02_AA_00172				XP_001879794.1	Pha_98955		XP_570605.1	XP_760726.1		XP_659243.1	XP_965651.2	Dikarya
ctg02_AA_00173			XP_001835604.2	XP_001886935.1								Agaricales
ctg02_AA_00174		XP_003038261.1	XP_001837383.1	XP_001886954.1	Pha_96123		XP_566903.1	XP_761208.1		XP_661618.1	XP_962718.2	Dikarya
ctg02_AA_00175												F.velutipes
ctg02_AA_00176												F.velutipes
ctg02_AA_00177		XP_003038276.1	XP_001837376.2		Pha_70445			XP_757317.1		XP_662980.1	XP_958722.1	Dikarya
ctg02_AA_00178	ctg02_AA_00456ctg02_AA_00457ctg02_AA_00462ctg02_AA_00469ctg02_AA_00524ctg02_AA_00525ctg02_AA_00530ctg05_AA_01753ctg06_AA_00124ctg06_AA_00139ctg06_AA_00145ctg06_AA_00149ctg11-1_AA_00322ctg11-2_AA_01280ctg33_AA_01107ctg01_AA_00523											F.velutipes
ctg02_AA_00179												F.velutipes
ctg02_AA_00180			XP_001834646.1	XP_001889922.1								Agaricales
ctg02_AA_00181	ctg01_AA_00401ctg02_AA_00162		XP_001834644.1	XP_001889951.1								Agaricales
ctg02_AA_00182		XP_003032484.1	XP_001831821.2	XP_001880022.1	Pha_66119		XP_570010.1	XP_759353.1	NP_012591.1	XP_681482.1	XP_958694.1	Dikarya
ctg02_AA_00183		XP_003034770.1	XP_001832853.1	XP_001886064.1 XP_001887560.1	Pha_64890		XP_569734.1	XP_759998.1	NP_014179.1	XP_658497.1	XP_960187.1	Dikarya
ctg02_AA_00184												F.velutipes
ctg02_AA_00185		XP_003033043.1	XP_001839650.1	XP_001890873.1 XP_001882715.1	Pha_70200		XP_572060.1	XP_756824.1	NP_015295.1	XP_681990.1	XP_964344.2	Dikarya
ctg02_AA_00186												F.velutipes
ctg02_AA_00187	ctg02_AA_00321ctg02_AA_00337ctg02_AA_00348ctg06_AA_00504ctg06_AA_00522ctg06_AA_00530ctg06_AA_00532ctg06_AA_00543ctg06_AA_00548ctg06_AA_00622ctg06_AA_00625ctg13_AA_00385											F.velutipes
ctg02_AA_00188	ctg02_AA_00197ctg05_AA_00353ctg06_AA_00016ctg11-2_AA_00017					XP_002473676.1						Agaricomycetes
ctg02_AA_00189			XP_001834368.1	XP_001888065.1	Pha_78258Pha_100090Pha_69152	XP_002472503.1						Agaricomycetes
ctg02_AA_00190	ctg05_AA_00353ctg06_AA_00032ctg11-2_AA_00017											F.velutipes
ctg02_AA_00191		XP_003036915.1	XP_001837394.2	XP_001886961.1	Pha_72894		XP_569090.1	XP_762343.1	NP_010227.1	XP_660758.1	XP_955821.1	Dikarya
ctg02_AA_00192		XP_003031030.1	XP_001828224.1	XP_001884500.1	Pha_78064Pha_72414Pha_97680	XP_002476471.1				XP_664322.1	XP_964849.1	Dikarya
ctg02_AA_00193		XP_003031030.1	XP_001828224.1	XP_001884500.1	Pha_78064Pha_72414Pha_97680	XP_002476471.1				XP_664322.1	XP_964849.1	Dikarya
ctg02_AA_00194		XP_003038317.1	XP_002911132.1	XP_001884291.1			XP_569953.1				XP_961767.2	Dikarya
ctg02_AA_00195		XP_003036523.1	XP_001832975.2	XP_001884294.1	Pha_97939			XP_757505.1	NP_013736.1	XP_664126.1	XP_961305.1	Dikarya
ctg02_AA_00196		XP_003036958.1	XP_001839327.2	XP_001884421.1	Pha_97938	XP_002473674.1	XP_570333.1	XP_757423.1	NP_012731.1	XP_664170.1	XP_960592.2	Dikarya
ctg02_AA_00197	ctg05_AA_00353ctg06_AA_00015ctg11-2_AA_00017ctg02_AA_00188											F.velutipes
ctg02_AA_00198	ctg05_AA_00610											F.velutipes
ctg02_AA_00199												F.velutipes
ctg02_AA_00200												F.velutipes
ctg02_AA_00201				XP_001884292.1								Agaricales
ctg02_AA_00202		XP_003036948.1	XP_001839326.1	XP_001884281.1	Pha_94991		XP_571498.1	XP_758484.1	NP_014363.1	XP_658410.1	XP_965701.2	Dikarya
ctg02_AA_00203		XP_003038293.1 XP_003031549.1 XP_003038294.1	XP_001837318.1		Pha_97926		XP_567227.1	XP_758947.1				Basidiomycota
ctg02_AA_00204		XP_003038292.1	XP_001837319.2	XP_001876786.1	Pha_72972	XP_002470356.1	XP_572902.1	XP_758830.1	NP_013755.1	XP_868839.1 XP_680890.1	XP_960556.1	Dikarya
ctg02_AA_00205		XP_003030947.1	XP_001838225.2	XP_001886799.1	Pha_64629	XP_002472973.1	XP_572796.1	XP_758792.1	NP_015407.1	XP_660452.1	XP_963234.2	Dikarya
ctg02_AA_00206	ctg13_AA_00751											F.velutipes
ctg02_AA_00207		XP_003030639.1	XP_002910967.1	XP_001879472.1	Pha_78344		XP_567917.1	XP_760329.1	NP_009725.1	XP_663563.1	XP_956787.1	Dikarya
ctg02_AA_00208	ctg05_AA_00104ctg11-2_AA_00524ctg11-2_AA_00586ctg11-2_AA_00587ctg11-2_AA_00601ctg11-2_AA_00605ctg13_AA_00905ctg13_AA_00915				Pha_71731							Agaricomycetes
ctg02_AA_00209		XP_003038272.1	XP_001837393.2	XP_001887041.1	Pha_27668	XP_002475479.1	XP_566871.1	XP_762334.1	NP_116684.1	XP_662661.1	XP_963738.1	Dikarya
ctg02_AA_00210		XP_003038287.1		XP_001877218.1		XP_002477559.1	XP_572081.1	XP_762042.1	NP_011271.1	XP_661697.1	XP_964198.1	Dikarya
ctg02_AA_00211		XP_003038275.1	XP_001837396.2	XP_001886963.1	Pha_23152		XP_568794.1	XP_756651.1	NP_009380.1	XP_659657.1	XP_957827.1	Dikarya
ctg02_AA_00212		XP_003036912.1	XP_001837397.2	XP_001887042.1		XP_002474042.1						Agaricomycetes
ctg02_AA_00213			XP_001837395.1	XP_001886962.1								Agaricales
ctg02_AA_00214	ctg11-2_AA_01304ctg29_AA_00490	XP_003036041.1 XP_003032905.1 XP_003031495.1 XP_003033679.1 XP_003026203.1	XP_001836631.2 XP_001829769.2	XP_001891216.1XP_001890682.1XP_001880806.1XP_001884696.1XP_001889308.1XP_001884979.1XP_001880807.1	Pha_67553	XP_002470546.1						Agaricomycetes
ctg02_AA_00215	ctg06_AA_00737ctg11-2_AA_01300ctg29_AA_00489											F.velutipes
ctg02_AA_00216	ctg13_AA_00160ctg01_AA_00685	XP_003034802.1	XP_001828374.1	XP_001878480.1	Pha_78184			XP_756493.1				Basidiomycota
ctg02_AA_00217		XP_003034308.1	XP_001835932.2	XP_001876154.1			XP_568300.1	XP_759495.1		XP_658010.1	XP_957782.2	Dikarya
ctg02_AA_00218				XP_001889711.1						XP_660492.1	XP_959964.1	Dikarya
ctg02_AA_00219												F.velutipes
ctg02_AA_00220	ctg05_AA_01164ctg11-1_AA_01186ctg13_AA_00620ctg13_AA_00626											F.velutipes
ctg02_AA_00221	ctg33_AA_01143											F.velutipes
ctg02_AA_00222	ctg02_AA_00224											F.velutipes
ctg02_AA_00223	ctg02_AA_00225											F.velutipes
ctg02_AA_00224	ctg02_AA_00222											F.velutipes
ctg02_AA_00225	ctg02_AA_00223											F.velutipes
ctg02_AA_00226		XP_003036564.1 XP_003037939.1 XP_003030381.1 XP_003033975.1 XP_003031830.1	XP_001840986.2 XP_001839116.2 XP_001837237.2	XP_001876710.1 XP_001878380.1 XP_001876972.1	Pha_96257 Pha_99612	XP_002475766.1					XP_958586.1	Dikarya
ctg02_AA_00227		XP_003038304.1	XP_001837375.1	XP_001886951.1	Pha_72962		XP_570635.1	XP_759426.1	NP_009806.1	XP_682667.1	XP_962536.2	Dikarya
ctg02_AA_00228		XP_003036932.1	XP_001837374.2	XP_001887037.1	Pha_72963		XP_572003.1	XP_758976.1			XP_957289.2	Dikarya
ctg02_AA_00229		XP_003036935.1	XP_001837373.2	XP_001886950.1	Pha_72964	XP_002473671.1	XP_569811.1					Basidiomycota
ctg02_AA_00230		XP_003036937.1	XP_001837371.2	XP_001876439.1 XP_001876910.1 XP_001875185.1	Pha_72966		XP_566556.1	XP_758251.1	NP_013557.1	XP_663497.1	XP_962532.2	Dikarya
ctg02_AA_00231		XP_003036938.1	XP_001837370.1	XP_001877223.1	Pha_72968	XP_002470355.1	XP_566812.1			XP_658558.1	XP_963204.1	Dikarya
ctg02_AA_00232												F.velutipes
ctg02_AA_00233		XP_003036939.1	XP_001837311.1	XP_001877222.1	Pha_72970 Pha_72969		XP_570246.1	XP_756786.1				Basidiomycota
ctg02_AA_00234		XP_003038297.1	XP_001837312.1	XP_001876790.1	Pha_72985							Agaricomycetes
ctg02_AA_00235												F.velutipes
ctg02_AA_00236			XP_001837313.1	XP_001877221.1	Pha_72973		XP_566518.1	XP_758204.1	NP_014670.1	XP_682393.1	XP_964548.1	Dikarya
ctg02_AA_00237		XP_003036953.1	XP_001841269.2	XP_001884287.1	Pha_78602		XP_567070.1	XP_758081.1	NP_013929.1	XP_658055.1	XP_961312.2	Dikarya
ctg02_AA_00238		XP_003036957.1	XP_001839333.1	XP_001884284.1	Pha_73007	XP_002473685.1	XP_566800.1	XP_762591.1		XP_663301.1	XP_960568.1	Dikarya
ctg02_AA_00239		XP_003038312.1	XP_001839334.2	XP_001884417.1	Pha_73008	XP_002470359.1	XP_570824.1	XP_762595.1	NP_013437.1 NP_011541.1	XP_658559.1	XP_963231.1	Dikarya
ctg02_AA_00240												F.velutipes
ctg02_AA_00241		XP_003038310.1	XP_001841263.1	XP_001884415.1	Pha_73011	XP_002475473.1	XP_568209.1	XP_762367.1	NP_012246.1 NP_116688.1	XP_659879.1	XP_957299.2	Dikarya
ctg02_AA_00242												F.velutipes
ctg02_AA_00243												F.velutipes
ctg02_AA_00244												F.velutipes
ctg02_AA_00245		XP_003036970.1	XP_001841243.1	XP_001884404.1	Pha_72959		XP_571070.1	XP_760347.1	NP_011304.2	XP_658054.1	XP_960229.1	Dikarya
ctg02_AA_00246		XP_003025893.1	XP_001841242.2	XP_001884279.1		XP_002473683.1	XP_566506.1					Basidiomycota
ctg02_AA_00247		XP_003038311.1	XP_001839328.1	XP_001884419.1	Pha_97946		XP_569633.1	XP_756330.1	NP_009403.1	XP_658412.1	XP_964098.1	Dikarya
ctg02_AA_00248												F.velutipes
ctg02_AA_00249		XP_003038299.1	XP_001841266.1		Pha_95002		XP_569054.1	XP_760936.1	NP_014452.1	XP_680574.1	XP_962017.1	Dikarya
ctg02_AA_00250		XP_003036927.1	XP_001841265.1	XP_001884409.1	Pha_65728		XP_572492.1	XP_762357.1				Basidiomycota
ctg02_AA_00251		XP_003036944.1	XP_001839341.2	XP_001884405.1	Pha_65720		XP_568751.1					Basidiomycota
ctg02_AA_00252		XP_003036955.1	XP_002911123.1	XP_001884288.1	Pha_73006	XP_002470392.1	XP_572350.1	XP_758859.1	NP_012214.1	XP_661359.1	XP_958140.1	Dikarya
ctg02_AA_00253	ctg33_AA_00135	XP_003030978.1	XP_002911009.1	XP_001878742.1	Pha_77662							Agaricomycetes
ctg02_AA_00254		XP_003026153.1 XP_003038776.1 XP_003030729.1		XP_001874253.1	Pha_68414Pha_68238	XP_002475983.1	XP_571035.1	XP_759943.1	NP_013943.1	XP_664789.1	XP_959146.2	Dikarya
ctg02_AA_00255	ctg26_AA_00311		XP_001834404.2 XP_001834411.2	XP_001879157.1						XP_658270.1		Dikarya
ctg02_AA_00256				XP_001877774.1								Agaricales
ctg02_AA_00257		XP_003028125.1	XP_001840401.1	XP_001879734.1	Pha_75356		XP_569210.1	XP_758615.1	NP_012077.1			Dikarya
ctg02_AA_00258		XP_003034038.1	XP_001835520.1	XP_001886942.1	Pha_63614	XP_002475624.1	XP_572499.1	XP_760896.1		XP_659576.1	XP_956884.2	Dikarya
ctg02_AA_00259		XP_003036952.1	XP_001839338.1	XP_001884296.1	Pha_65708		XP_566668.1	XP_757554.1	NP_014818.1	XP_664134.1	XP_963006.1	Dikarya
ctg02_AA_00260		XP_003036951.1	XP_001839337.1	XP_001884413.1								Agaricales
ctg02_AA_00261												F.velutipes
ctg02_AA_00262												F.velutipes
ctg02_AA_00263		XP_003036928.1	XP_001839345.2	XP_001884298.1	Pha_97943		XP_566727.1 XP_566635.1	XP_757472.1				Basidiomycota
ctg02_AA_00264		XP_003038301.1	XP_001839344.1	XP_001884425.1	Pha_72995	XP_002473682.1 XP_002470390.1	XP_570671.1	XP_757471.1	NP_014098.1 NP_014521.1	XP_663404.1	XP_956573.1	Dikarya
ctg02_AA_00265		XP_003036929.1	XP_001839346.2	XP_001884300.1	Pha_72997	XP_002476900.1	XP_569678.1					Basidiomycota
ctg02_AA_00266												F.velutipes
ctg02_AA_00267		XP_003028142.1	XP_001834102.1	XP_001879963.1	Pha_69231		XP_572006.1		NP_013463.1	XP_663813.1	XP_962999.2	Dikarya
ctg02_AA_00268												F.velutipes
ctg02_AA_00269		XP_003038328.1	XP_001839430.1	XP_001884352.1	Pha_30232	XP_002470369.1	XP_570031.1	XP_762322.1	NP_014897.1	XP_658438.1	XP_956682.1	Dikarya
ctg02_AA_00270		XP_003035353.1	XP_001828131.1	XP_001882180.1 XP_001876367.1	Pha_77193	XP_002472928.1 XP_002475825.1						Agaricomycetes
ctg02_AA_00271	ctg02_AA_00330											F.velutipes
ctg02_AA_00272		XP_003038290.1	XP_001837326.1	XP_001876780.1	Pha_72991	XP_002470387.1						Agaricomycetes
ctg02_AA_00273												F.velutipes
ctg02_AA_00274		XP_003036924.1	XP_001837316.2	XP_001877220.1	Pha_72976		XP_570704.1 XP_571123.1	XP_761904.1		XP_663670.1	XP_956679.2	Dikarya
ctg02_AA_00275												F.velutipes
ctg02_AA_00276												F.velutipes
ctg02_AA_00277	ctg02_AA_00278ctg13_AA_01022ctg13_AA_01023	XP_003031815.1XP_003033010.1XP_003033008.1	XP_001835316.2 XP_001830517.2 XP_001831405.2 XP_001832153.2	XP_001886732.1	Pha_94616Pha_74634	XP_002472347.1	XP_567025.1			XP_662882.1		Dikarya
ctg02_AA_00278	ctg13_AA_01022ctg13_AA_01023ctg02_AA_00277	XP_003031815.1XP_003033010.1XP_003033008.1	XP_001835316.2 XP_001830517.2 XP_001831405.2 XP_001832153.2	XP_001886732.1	Pha_94616Pha_74634	XP_002472347.1	XP_567025.1			XP_662882.1		Dikarya
ctg02_AA_00279		XP_003036806.1	XP_002911234.1	XP_001877211.1		XP_002470333.1	XP_571880.1					Basidiomycota
ctg02_AA_00280												F.velutipes
ctg02_AA_00281	ctg02_AA_00108											F.velutipes
ctg02_AA_00282	ctg02_AA_00283	XP_003035058.1	XP_001835018.2	XP_001888410.1	Pha_98559		XP_567821.1	XP_757155.1	NP_014137.1	XP_660671.1	XP_955939.2	Dikarya
ctg02_AA_00283	ctg02_AA_00282	XP_003035058.1	XP_001835018.2	XP_001888410.1	Pha_98559		XP_567821.1	XP_757155.1	NP_014137.1	XP_660671.1	XP_955939.2	Dikarya
ctg02_AA_00284		XP_003038235.1	XP_001836995.1	XP_001875309.1	Pha_94779		XP_568318.1	XP_762391.1	NP_010113.1	XP_680901.1	XP_960697.1	Dikarya
ctg02_AA_00285		XP_003036872.1	XP_002911159.1	XP_001874748.1			XP_572742.1					Basidiomycota
ctg02_AA_00286		XP_003037685.1	XP_002912091.1		Pha_74082Pha_73603	XP_002474999.1 XP_002470696.1	XP_566792.1	XP_758308.1 XP_759163.1		XP_663228.1	XP_956959.1 XP_965195.1	Dikarya
ctg02_AA_00287	ctg13_AA_00635											F.velutipes
ctg02_AA_00288		XP_003033234.1	XP_001831558.1	XP_001883766.1	Pha_71957		XP_568900.1		NP_010583.1	XP_658244.1	XP_957356.2	Dikarya
ctg02_AA_00289												F.velutipes
ctg02_AA_00290	ctg01_AA_00254											F.velutipes
ctg02_AA_00291												F.velutipes
ctg02_AA_00292												F.velutipes
ctg02_AA_00293	ctg03_AA_01141ctg11-1_AA_01095ctg33_AA_00624											F.velutipes
ctg02_AA_00294	ctg01_AA_00251											F.velutipes
ctg02_AA_00295												F.velutipes
ctg02_AA_00296	ctg13_AA_00396ctg33_AA_00546											F.velutipes
ctg02_AA_00297												F.velutipes
ctg02_AA_00298		XP_003034268.1	XP_001835757.1	XP_001876246.1	Pha_77815							Agaricomycetes
ctg02_AA_00299		XP_003036830.1	XP_001836935.2	XP_001874723.1	Pha_63923							Agaricomycetes
ctg02_AA_00300		XP_003029919.1	XP_001830468.2	XP_001880468.1	Pha_66673						XP_956245.2	Dikarya
ctg02_AA_00301				XP_001889020.1								Agaricales
ctg02_AA_00302												F.velutipes
ctg02_AA_00303	ctg26_AA_00168		XP_001838995.2	XP_001878839.1								Agaricales
ctg02_AA_00304												F.velutipes
ctg02_AA_00305			XP_001832232.2 XP_001837591.2 XP_001837595.1	XP_001876457.1 XP_001876444.1 XP_001876509.1 XP_001876921.1	Pha_65407		XP_570901.1	XP_757185.1		XP_658507.1	XP_955838.2 XP_958862.1	Dikarya
ctg02_AA_00306		XP_003030817.1	XP_001841249.2		Pha_73027		XP_570757.1 XP_570758.1	XP_759410.1	NP_009672.1	XP_661876.1	XP_961377.1	Dikarya
ctg02_AA_00307												F.velutipes
ctg02_AA_00308												F.velutipes
ctg02_AA_00309												F.velutipes
ctg02_AA_00310												F.velutipes
ctg02_AA_00311		XP_003031203.1	XP_001841221.2	XP_001884396.1	Pha_73040		XP_567267.1	XP_758486.1	NP_012018.1	XP_663775.1	XP_961620.1	Dikarya
ctg02_AA_00312												F.velutipes
ctg02_AA_00313												F.velutipes
ctg02_AA_00314		XP_003026275.1	XP_001841237.1	XP_001884271.1	Pha_73034	XP_002475481.1	XP_571075.1	XP_762307.1	NP_013788.1			Dikarya
ctg02_AA_00315		XP_003026194.1	XP_001841236.2	XP_001884397.1	Pha_73036	XP_002475470.1						Agaricomycetes
ctg02_AA_00316		XP_003028767.1 XP_003036753.1 XP_003034568.1	XP_001836055.2 XP_001841224.1	XP_001881602.1 XP_001884269.1 XP_001887832.1 XP_001879146.1 XP_001875675.1	Pha_65573 Pha_73046	XP_002470798.1 XP_002475628.1		XP_756993.1			XP_962215.2	Dikarya
ctg02_AA_00317		XP_003026193.1	XP_001833450.1	XP_001884274.1	Pha_97975		XP_572890.1		NP_011577.1		XP_960597.1	Dikarya
ctg02_AA_00318												F.velutipes
ctg02_AA_00319	ctg06_AA_00501											F.velutipes
ctg02_AA_00320												F.velutipes
ctg02_AA_00321	ctg02_AA_00337ctg02_AA_00348ctg06_AA_00467ctg06_AA_00504ctg06_AA_00522ctg06_AA_00530ctg06_AA_00532ctg06_AA_00543ctg06_AA_00548ctg06_AA_00622ctg06_AA_00625ctg13_AA_00385ctg02_AA_00187											F.velutipes
ctg02_AA_00322	ctg26_AA_00408											F.velutipes
ctg02_AA_00323												F.velutipes
ctg02_AA_00324												F.velutipes
ctg02_AA_00325		XP_003036091.1	XP_001841231.2	XP_001884392.1				XP_757868.1				Basidiomycota
ctg02_AA_00326	ctg05_AA_00413ctg05_AA_01283ctg11-1_AA_00488ctg11-1_AA_00677ctg11-1_AA_01451											F.velutipes
ctg02_AA_00327												F.velutipes
ctg02_AA_00328		XP_003025899.1	XP_002911139.1	XP_001884267.1	Pha_97970		XP_568360.1	XP_756801.1			XP_956603.2	Dikarya
ctg02_AA_00329		XP_003025897.1	XP_002911138.1	XP_001884394.1	Pha_73049	XP_002470397.1 XP_002471088.1	XP_569115.1	XP_762371.1	NP_009365.1	XP_661642.1	XP_961727.1	Dikarya
ctg02_AA_00330	ctg02_AA_00271											F.velutipes
ctg02_AA_00331		XP_003025898.1	XP_002911137.1	XP_001884393.1 XP_001884344.1 XP_001884115.1	Pha_73050		XP_571301.1 XP_571300.1 XP_571299.1			XP_868888.1		Dikarya
ctg02_AA_00332												F.velutipes
ctg02_AA_00333	ctg03_AA_00091ctg03_AA_00205ctg03_AA_00207ctg05_AA_00273ctg05_AA_00276ctg29_AA_00055											F.velutipes
ctg02_AA_00334	ctg02_AA_00338ctg02_AA_00339											F.velutipes
ctg02_AA_00335												F.velutipes
ctg02_AA_00336												F.velutipes
ctg02_AA_00337	ctg02_AA_00348ctg06_AA_00467ctg06_AA_00492ctg06_AA_00504ctg06_AA_00522ctg06_AA_00529ctg06_AA_00530ctg06_AA_00532ctg06_AA_00543ctg06_AA_00548ctg06_AA_00622ctg06_AA_00625ctg13_AA_00385ctg02_AA_00187ctg02_AA_00321											F.velutipes
ctg02_AA_00338	ctg02_AA_00339ctg02_AA_00334											F.velutipes
ctg02_AA_00339	ctg02_AA_00334ctg02_AA_00338											F.velutipes
ctg02_AA_00340		XP_003038963.1	XP_001841232.2	XP_001884265.1	Pha_27784		XP_569784.1	XP_760885.1	NP_011001.1	XP_659384.1	XP_957892.1	Dikarya
ctg02_AA_00341		XP_003037749.1 XP_003036373.1	XP_001835630.2	XP_001876175.1	Pha_77786 Pha_69479	XP_002475649.1		XP_760651.1		XP_682013.1		Dikarya
ctg02_AA_00342		XP_003028421.1	XP_001834224.1	XP_001879765.1							XP_956351.1	Dikarya
ctg02_AA_00343	ctg02_AA_00344ctg02_AA_00354ctg13_AA_00380ctg13_AA_00386ctg29_AA_00255											F.velutipes
ctg02_AA_00344	ctg02_AA_00354ctg13_AA_00380ctg13_AA_00386ctg13_AA_00967ctg29_AA_00255ctg02_AA_00343											F.velutipes
ctg02_AA_00345		XP_003036969.1	XP_001841223.2	XP_001884395.1	Pha_97968	XP_002475469.1	XP_567001.1	XP_762398.1		XP_680816.1	XP_960661.2	Dikarya
ctg02_AA_00346		XP_003025901.1	XP_001836876.2	XP_001884382.1	Pha_97974							Agaricomycetes
ctg02_AA_00347		XP_003026182.1	XP_001836875.2	XP_001884253.1	Pha_73055		XP_566746.1	XP_762373.1		XP_680783.1	XP_960178.1	Dikarya
ctg02_AA_00348	ctg06_AA_00504ctg06_AA_00522ctg06_AA_00530ctg06_AA_00532ctg06_AA_00543ctg06_AA_00548ctg06_AA_00622ctg06_AA_00625ctg13_AA_00385ctg02_AA_00187ctg02_AA_00321ctg02_AA_00337											F.velutipes
ctg02_AA_00349		XP_003032093.1	XP_001835968.1			XP_002471245.1						Agaricomycetes
ctg02_AA_00350	ctg11-2_AA_01665											F.velutipes
ctg02_AA_00351						XP_002475175.1						Agaricomycetes
ctg02_AA_00352												F.velutipes
ctg02_AA_00353	ctg02_AA_00354		XP_001834578.1	XP_001881944.1	Pha_75196		XP_569153.1	XP_757721.1 XP_762188.1				Basidiomycota
ctg02_AA_00354	ctg02_AA_00391ctg13_AA_00380ctg13_AA_00386ctg29_AA_00255ctg02_AA_00343ctg02_AA_00344ctg02_AA_00353											F.velutipes
ctg02_AA_00355		XP_003033551.1	XP_001840743.2	XP_001890509.1 XP_001884014.1 XP_001883984.1 XP_001883934.1	Pha_70728		XP_570873.1	XP_761471.1	NP_009536.1	XP_682149.1	XP_965442.1	Dikarya
ctg02_AA_00356		XP_003035879.1										Agaricales
ctg02_AA_00357												F.velutipes
ctg02_AA_00358	ctg11-1_AA_01353ctg26_AA_00507											F.velutipes
ctg02_AA_00359												F.velutipes
ctg02_AA_00360	ctg02_AA_00370ctg02_AA_00371ctg02_AA_00378ctg02_AA_00394ctg02_AA_00476ctg02_AA_00482ctg05_AA_01656ctg11-1_AA_00231ctg11-2_AA_01504ctg26_AA_00451ctg33_AA_00233											F.velutipes
ctg02_AA_00361	ctg13_AA_00852											F.velutipes
ctg02_AA_00362	ctg06_AA_00762ctg11-1_AA_00251ctg11-2_AA_00625ctg13_AA_00847ctg29_AA_00813											F.velutipes
ctg02_AA_00363	ctg05_AA_01150ctg05_AA_01220ctg06_AA_00761ctg13_AA_00776ctg26_AA_00517ctg29_AA_00376ctg29_AA_00814											F.velutipes
ctg02_AA_00364												F.velutipes
ctg02_AA_00365	ctg05_AA_01591ctg06_AA_00763											F.velutipes
ctg02_AA_00366	ctg06_AA_00760ctg06_AA_00763ctg29_AA_00377											F.velutipes
ctg02_AA_00367	ctg05_AA_01592ctg11-2_AA_00622ctg11-2_AA_00628	XP_003033414.1 XP_003033416.1	XP_002911531.1 XP_001831340.2	Lacc XP_001881574.1 Lacc XP_001875129.1	Pha_65195			XP_759482.1				Basidiomycota
ctg02_AA_00368												F.velutipes
ctg02_AA_00369		XP_003027106.1	XP_001839554.1	XP_001880025.1	Pha_98102		XP_568335.1	XP_756526.1		XP_660511.1	XP_959880.1	Dikarya
ctg02_AA_00370	ctg02_AA_00371ctg02_AA_00394ctg02_AA_00476ctg02_AA_00482ctg05_AA_01656ctg11-1_AA_00231ctg11-2_AA_01504ctg33_AA_00233ctg02_AA_00360											F.velutipes
ctg02_AA_00371	ctg02_AA_00372ctg02_AA_00378ctg02_AA_00394ctg02_AA_00476ctg02_AA_00482ctg05_AA_01656ctg11-1_AA_00231ctg11-2_AA_01504ctg26_AA_00451ctg33_AA_00233ctg02_AA_00360ctg02_AA_00370											F.velutipes
ctg02_AA_00372	ctg02_AA_00378ctg02_AA_00371											F.velutipes
ctg02_AA_00373	ctg11-2_AA_01657ctg01_AA_00085	XP_003028379.1			Pha_96025Pha_78877Pha_78876	XP_002477689.1XP_002474399.1						Agaricomycetes
ctg02_AA_00374	ctg29_AA_00148											F.velutipes
ctg02_AA_00375												F.velutipes
ctg02_AA_00376	ctg02_AA_00485ctg11-1_AA_00990											F.velutipes
ctg02_AA_00377		XP_003026201.1	XP_001841275.1	XP_001884277.1	Pha_73019	XP_002473654.1	XP_569059.1	XP_762358.1	NP_013844.2	XP_664111.1	XP_961147.1	Dikarya
ctg02_AA_00378	ctg02_AA_00482ctg05_AA_01656ctg11-1_AA_00231ctg11-2_AA_01504ctg33_AA_00233ctg02_AA_00360ctg02_AA_00371ctg02_AA_00372											F.velutipes
ctg02_AA_00379	ctg03_AA_00228ctg11-1_AA_00002ctg11-2_AA_01624ctg26_AA_00331ctg29_AA_00043ctg33_AA_00320ctg01_AA_00358											F.velutipes
ctg02_AA_00380												F.velutipes
ctg02_AA_00381	ctg13_AA_00019											F.velutipes
ctg02_AA_00382		XP_003027455.1	XP_002910268.1	XP_001883199.1 XP_001883200.1	Pha_27420	XP_002470305.1	XP_570033.1		NP_014375.1			Dikarya
ctg02_AA_00383	ctg02_AA_00394ctg02_AA_00484ctg11-1_AA_00231ctg26_AA_00451ctg33_AA_00234											F.velutipes
ctg02_AA_00384												F.velutipes
ctg02_AA_00385	ctg02_AA_00388ctg26_AA_00322											F.velutipes
ctg02_AA_00386												F.velutipes
ctg02_AA_00387												F.velutipes
ctg02_AA_00388	ctg05_AA_01158ctg11-1_AA_00082ctg13_AA_00073ctg26_AA_00315ctg26_AA_00322ctg01_AA_00417ctg02_AA_00385											F.velutipes
ctg02_AA_00389		XP_003025924.1	XP_001840632.2	XP_001885112.1	Pha_30653		XP_567506.1		NP_015099.1	XP_659266.1	XP_958594.1	Dikarya
ctg02_AA_00390												F.velutipes
ctg02_AA_00391	ctg02_AA_00392ctg06_AA_00293ctg13_AA_00380ctg13_AA_00386ctg29_AA_00565ctg29_AA_00804ctg02_AA_00354											F.velutipes
ctg02_AA_00392	ctg29_AA_00565ctg29_AA_00804ctg02_AA_00391											F.velutipes
ctg02_AA_00393	ctg11-1_AA_01140											F.velutipes
ctg02_AA_00394	ctg02_AA_00476ctg02_AA_00482ctg02_AA_00483ctg02_AA_00484ctg05_AA_01656ctg11-1_AA_00231ctg11-2_AA_01504ctg26_AA_00451ctg33_AA_00233ctg33_AA_00234ctg02_AA_00360ctg02_AA_00370ctg02_AA_00371ctg02_AA_00383											F.velutipes
ctg02_AA_00395												F.velutipes
ctg02_AA_00396	ctg02_AA_00397ctg06_AA_00640	XP_003034145.1	XP_001828160.2									Agaricales
ctg02_AA_00397	ctg33_AA_01138ctg02_AA_00396											F.velutipes
ctg02_AA_00398	ctg11-1_AA_01006											F.velutipes
ctg02_AA_00399	ctg02_AA_00544ctg06_AA_00205											F.velutipes
ctg02_AA_00400	ctg02_AA_00545ctg06_AA_00204											F.velutipes
ctg02_AA_00401	ctg02_AA_00546ctg05_AA_00236ctg06_AA_00203ctg06_AA_00223				Pha_69429 Pha_97904	XP_002470396.1		XP_758028.1		XP_660909.1	XP_961719.1	Dikarya
ctg02_AA_00402	ctg02_AA_00547ctg06_AA_00202	XP_003032123.1	XP_001840496.2 XP_001840497.2	XP_001881872.1XP_001877570.1	Pha_95856	XP_002475523.1				XP_658068.1	XP_956238.1XP_961705.1	Dikarya
ctg02_AA_00403	ctg02_AA_00548ctg06_AA_00201											F.velutipes
ctg02_AA_00404	ctg02_AA_00549ctg06_AA_00200											F.velutipes
ctg02_AA_00405	ctg02_AA_00551ctg06_AA_00199	XP_003028400.1	XP_002910397.1	XP_001879743.1	Pha_78305							Agaricomycetes
ctg02_AA_00406	ctg02_AA_00553	XP_003028401.1	XP_001834166.1	XP_001879741.1	Pha_31042		XP_568808.1	XP_759731.1	NP_014151.1	XP_659887.1	XP_957125.1	Dikarya
ctg02_AA_00407	ctg02_AA_00554ctg06_AA_00198	XP_003038470.1		XP_001888457.1								Agaricales
ctg02_AA_00408	ctg02_AA_00409ctg02_AA_00411ctg02_AA_00414ctg02_AA_00555ctg02_AA_00556ctg02_AA_00558ctg06_AA_00191ctg06_AA_00196ctg06_AA_00197ctg11-2_AA_01536ctg11-2_AA_01538											F.velutipes
ctg02_AA_00409	ctg02_AA_00411ctg02_AA_00414ctg02_AA_00555ctg02_AA_00556ctg02_AA_00558ctg06_AA_00191ctg06_AA_00196ctg06_AA_00197ctg11-2_AA_01536ctg11-2_AA_01537ctg11-2_AA_01538ctg02_AA_00408											F.velutipes
ctg02_AA_00410	ctg02_AA_00411ctg02_AA_00558ctg06_AA_00195											F.velutipes
ctg02_AA_00411	ctg02_AA_00414ctg02_AA_00555ctg02_AA_00556ctg02_AA_00558ctg06_AA_00191ctg06_AA_00196ctg06_AA_00197ctg11-2_AA_01536ctg11-2_AA_01538ctg02_AA_00408ctg02_AA_00409ctg02_AA_00410											F.velutipes
ctg02_AA_00412	ctg06_AA_00193ctg06_AA_00194	XP_003028415.1	XP_001834167.2	XP_001879996.1	Pha_78302		XP_572085.1	XP_758647.1	NP_012367.2	XP_682094.1	XP_957740.1	Dikarya
ctg02_AA_00413	ctg02_AA_00560ctg06_AA_00192											F.velutipes
ctg02_AA_00414	ctg02_AA_00555ctg02_AA_00556ctg02_AA_00558ctg06_AA_00191ctg06_AA_00196ctg06_AA_00197ctg11-2_AA_01536ctg02_AA_00408ctg02_AA_00409ctg02_AA_00411											F.velutipes
ctg02_AA_00415	ctg02_AA_00417ctg02_AA_00562ctg02_AA_00567ctg06_AA_00190											F.velutipes
ctg02_AA_00416	ctg02_AA_00422ctg02_AA_00423ctg02_AA_00425ctg02_AA_00491ctg02_AA_00494ctg02_AA_00563ctg06_AA_00182ctg06_AA_00183ctg06_AA_00189											F.velutipes
ctg02_AA_00417	ctg02_AA_00486ctg02_AA_00562ctg02_AA_00567ctg06_AA_00190ctg02_AA_00415											F.velutipes
ctg02_AA_00418	ctg02_AA_00487ctg06_AA_00187											F.velutipes
ctg02_AA_00419	ctg02_AA_00420ctg02_AA_00488ctg02_AA_00489ctg06_AA_00185ctg06_AA_00186											F.velutipes
ctg02_AA_00420	ctg02_AA_00488ctg02_AA_00489ctg06_AA_00185ctg06_AA_00186ctg02_AA_00419											F.velutipes
ctg02_AA_00421	ctg02_AA_00490ctg06_AA_00184	XP_003028114.1	XP_001834004.2	XP_001879981.1								Agaricales
ctg02_AA_00422	ctg02_AA_00423ctg02_AA_00425ctg02_AA_00491ctg02_AA_00494ctg02_AA_00563ctg06_AA_00182ctg06_AA_00183ctg06_AA_00189ctg02_AA_00416			XP_001875634.1								Agaricales
ctg02_AA_00423	ctg02_AA_00425ctg02_AA_00491ctg02_AA_00494ctg02_AA_00563ctg06_AA_00182ctg06_AA_00183ctg06_AA_00189ctg02_AA_00416ctg02_AA_00422											F.velutipes
ctg02_AA_00424	ctg02_AA_00493ctg06_AA_00181											F.velutipes
ctg02_AA_00425	ctg02_AA_00491ctg02_AA_00492ctg02_AA_00494ctg02_AA_00563ctg06_AA_00182ctg06_AA_00183ctg06_AA_00189ctg02_AA_00416ctg02_AA_00422ctg02_AA_00423											F.velutipes
ctg02_AA_00426	ctg02_AA_00495ctg06_AA_00180	XP_003028108.1	XP_001834210.2	XP_001879995.1		XP_002476225.1	XP_571500.1	XP_760311.1				Basidiomycota
ctg02_AA_00427		XP_003035712.1	XP_001833852.2	XP_001881175.1	Pha_63882		XP_570385.1	XP_760149.1		XP_660034.1	XP_962353.2	Dikarya
ctg02_AA_00428	ctg06_AA_00064ctg06_AA_00098ctg06_AA_00178ctg06_AA_00179ctg33_AA_00884		XP_001829638.2									Agaricales
ctg02_AA_00429	ctg02_AA_00497ctg06_AA_00064ctg06_AA_00098ctg06_AA_00177ctg06_AA_00178ctg33_AA_00884											F.velutipes
ctg02_AA_00430	ctg02_AA_00498ctg06_AA_00176	XP_003028426.1		XP_001879732.1	Pha_66216		XP_572134.1	XP_758487.1	NP_116665.1	XP_681968.1	XP_965550.1	Dikarya
ctg02_AA_00431	ctg02_AA_00499ctg06_AA_00175											F.velutipes
ctg02_AA_00432	ctg02_AA_00500ctg06_AA_00174											F.velutipes
ctg02_AA_00433	ctg02_AA_00501ctg06_AA_00173											F.velutipes
ctg02_AA_00434	ctg02_AA_00502ctg06_AA_00172	XP_003028137.1	XP_001833990.2	XP_001879955.1								Agaricales
ctg02_AA_00435	ctg02_AA_00503ctg06_AA_00171	XP_003039030.1			Pha_72121	XP_002474788.1			NP_014064.1NP_116594.1	XP_664025.1XP_663015.1	XP_957035.2	Dikarya
ctg02_AA_00436	ctg02_AA_00504ctg06_AA_00170	XP_003028138.1	XP_001833992.1	XP_001879954.1			XP_571530.1	XP_757779.1				Basidiomycota
ctg02_AA_00437	ctg02_AA_00505ctg06_AA_00169											F.velutipes
ctg02_AA_00438	ctg02_AA_00506	XP_003028437.1	XP_001833987.2	XP_001879182.1						XP_660244.1		Dikarya
ctg02_AA_00439	ctg02_AA_00507ctg06_AA_00167											F.velutipes
ctg02_AA_00440	ctg02_AA_00508ctg06_AA_00166					XP_002472555.1XP_002476276.1						Agaricomycetes
ctg02_AA_00441	ctg02_AA_00509ctg06_AA_00165	XP_003028127.1	XP_001833979.2	XP_001879959.1	Pha_75364	XP_002473320.1						Agaricomycetes
ctg02_AA_00442	ctg02_AA_00510ctg06_AA_00164	XP_003028429.1		XP_001879705.1	Pha_75371		XP_570596.1	XP_759959.1	NP_010744.1	XP_659892.1	XP_956772.2	Dikarya
ctg02_AA_00443	ctg02_AA_00512ctg06_AA_00162											F.velutipes
ctg02_AA_00444	ctg02_AA_00512ctg06_AA_00162	XP_003028430.1	XP_001833980.2	XP_001879735.1	Pha_69156	XP_002470746.1		XP_758596.1	NP_012594.1	XP_681003.1	XP_959027.1	Dikarya
ctg02_AA_00445	ctg02_AA_00451ctg02_AA_00461ctg02_AA_00468ctg02_AA_00513ctg02_AA_00519ctg02_AA_00522ctg02_AA_00529ctg02_AA_00536ctg06_AA_00069ctg06_AA_00123ctg06_AA_00139ctg06_AA_00145ctg06_AA_00152ctg06_AA_00155ctg06_AA_00161	XP_003029311.1					XP_572061.1	XP_760258.1		XP_664765.1XP_661807.1	XP_963883.1	Dikarya
ctg02_AA_00446	ctg02_AA_00514ctg06_AA_00160	XP_003030492.1XP_003032061.1XP_003026456.1XP_003026455.1	XP_001831939.1 XP_001831963.1	XP_001885054.1XP_001885143.1	Pha_68728	XP_002474177.1XP_002476484.1		XP_758217.1	NP_012815.1	XP_660319.1 XP_659200.1		Dikarya
ctg02_AA_00447	ctg02_AA_00515ctg06_AA_00159											F.velutipes
ctg02_AA_00448	ctg02_AA_00516ctg06_AA_00158											F.velutipes
ctg02_AA_00449	ctg06_AA_00157											F.velutipes
ctg02_AA_00450	ctg02_AA_00518ctg06_AA_00156			XP_001882714.1								Agaricales
ctg02_AA_00451	ctg02_AA_00461ctg02_AA_00468ctg02_AA_00513ctg02_AA_00519ctg02_AA_00522ctg02_AA_00529ctg02_AA_00536ctg06_AA_00069ctg06_AA_00123ctg06_AA_00139ctg06_AA_00145ctg06_AA_00152ctg06_AA_00155ctg06_AA_00161ctg02_AA_00445	XP_003029311.1					XP_572061.1	XP_760258.1		XP_664765.1XP_661807.1	XP_963883.1	Dikarya
ctg02_AA_00452	ctg02_AA_00520ctg06_AA_00154											F.velutipes
ctg02_AA_00453	ctg02_AA_00521ctg06_AA_00056ctg06_AA_00067ctg06_AA_00153	XP_003028140.1	XP_001833996.2	XP_001875075.1		XP_002477064.1						Agaricomycetes
ctg02_AA_00454		XP_003028438.1	XP_001833995.1	XP_001875076.1	Pha_75335			XP_758096.1				Basidiomycota
ctg02_AA_00455	ctg02_AA_00459ctg02_AA_00523ctg02_AA_00527ctg06_AA_00147ctg06_AA_00151											F.velutipes
ctg02_AA_00456	ctg02_AA_00462ctg02_AA_00469ctg02_AA_00524ctg02_AA_00530ctg05_AA_01753ctg06_AA_00124ctg06_AA_00139ctg06_AA_00145ctg11-1_AA_00322ctg11-2_AA_01280ctg33_AA_01107ctg01_AA_00523ctg02_AA_00178											F.velutipes
ctg02_AA_00457	ctg02_AA_00462ctg02_AA_00469ctg02_AA_00525ctg02_AA_00530ctg06_AA_00124ctg06_AA_00149ctg11-2_AA_01280ctg33_AA_01107ctg02_AA_00178											F.velutipes
ctg02_AA_00458	ctg02_AA_00463ctg02_AA_00470ctg02_AA_00526ctg02_AA_00531ctg02_AA_00538ctg03_AA_01255ctg05_AA_01754ctg06_AA_00125ctg06_AA_00129ctg06_AA_00138ctg06_AA_00144ctg06_AA_00148ctg11-1_AA_00321ctg11-2_AA_00806ctg11-2_AA_01281ctg01_AA_00524ctg01_AA_00553ctg01_AA_00554											F.velutipes
ctg02_AA_00459	ctg02_AA_00465ctg02_AA_00523ctg02_AA_00527ctg02_AA_00533ctg06_AA_00141ctg06_AA_00147ctg06_AA_00151ctg02_AA_00455											F.velutipes
ctg02_AA_00460	ctg02_AA_00528ctg06_AA_00146											F.velutipes
ctg02_AA_00461	ctg02_AA_00468ctg02_AA_00513ctg02_AA_00519ctg02_AA_00522ctg02_AA_00529ctg02_AA_00536ctg06_AA_00069ctg06_AA_00123ctg06_AA_00139ctg06_AA_00145ctg06_AA_00152ctg06_AA_00155ctg06_AA_00161ctg02_AA_00445ctg02_AA_00451											F.velutipes
ctg02_AA_00462	ctg02_AA_00469ctg02_AA_00524ctg02_AA_00525ctg02_AA_00530ctg05_AA_01753ctg06_AA_00124ctg06_AA_00139ctg06_AA_00145ctg06_AA_00149ctg11-1_AA_00322ctg11-2_AA_01280ctg33_AA_01107ctg01_AA_00523ctg02_AA_00178ctg02_AA_00456ctg02_AA_00457											F.velutipes
ctg02_AA_00463	ctg02_AA_00470ctg02_AA_00526ctg02_AA_00531ctg02_AA_00538ctg03_AA_01255ctg05_AA_01754ctg06_AA_00125ctg06_AA_00129ctg06_AA_00138ctg06_AA_00144ctg11-1_AA_00321ctg11-2_AA_00806ctg11-2_AA_01281ctg13_AA_00378ctg01_AA_00524ctg01_AA_00553ctg01_AA_00554ctg02_AA_00458											F.velutipes
ctg02_AA_00464	ctg02_AA_00532ctg06_AA_00143											F.velutipes
ctg02_AA_00465	ctg02_AA_00472ctg02_AA_00527ctg02_AA_00533ctg02_AA_00540ctg06_AA_00141ctg06_AA_00147ctg02_AA_00459											F.velutipes
ctg02_AA_00466	ctg02_AA_00534ctg06_AA_00141											F.velutipes
ctg02_AA_00467	ctg02_AA_00535ctg06_AA_00140											F.velutipes
ctg02_AA_00468	ctg02_AA_00513ctg02_AA_00519ctg02_AA_00522ctg02_AA_00529ctg02_AA_00536ctg06_AA_00069ctg06_AA_00123ctg06_AA_00139ctg06_AA_00145ctg06_AA_00152ctg06_AA_00155ctg06_AA_00161ctg02_AA_00445ctg02_AA_00451ctg02_AA_00461	XP_003029311.1					XP_572061.1	XP_760258.1		XP_664765.1XP_661807.1	XP_963883.1	Dikarya
ctg02_AA_00469	ctg02_AA_00524ctg02_AA_00525ctg02_AA_00530ctg05_AA_01753ctg06_AA_00124ctg06_AA_00139ctg06_AA_00145ctg06_AA_00149ctg11-1_AA_00322ctg11-2_AA_01280ctg33_AA_01107ctg01_AA_00523ctg02_AA_00178ctg02_AA_00456ctg02_AA_00457ctg02_AA_00462											F.velutipes
ctg02_AA_00470	ctg02_AA_00526ctg02_AA_00531ctg02_AA_00538ctg03_AA_01255ctg05_AA_01754ctg06_AA_00125ctg06_AA_00129ctg06_AA_00138ctg06_AA_00144ctg11-1_AA_00321ctg11-2_AA_00806ctg11-2_AA_01281ctg13_AA_00378ctg01_AA_00524ctg01_AA_00553ctg01_AA_00554ctg02_AA_00458ctg02_AA_00463											F.velutipes
ctg02_AA_00471	ctg02_AA_00539ctg06_AA_00137											F.velutipes
ctg02_AA_00472	ctg02_AA_00533ctg02_AA_00540ctg06_AA_00141ctg02_AA_00465											F.velutipes
ctg02_AA_00473	ctg02_AA_00541ctg05_AA_00202ctg05_AA_00203ctg06_AA_00135ctg13_AA_00065ctg13_AA_00084ctg13_AA_00092ctg26_AA_00254ctg29_AA_00778ctg01_AA_00492			XP_001890792.1XP_001884769.1XP_001877162.1XP_001874476.1								Agaricales
ctg02_AA_00474	ctg02_AA_00542											F.velutipes
ctg02_AA_00475												F.velutipes
ctg02_AA_00476	ctg02_AA_00482ctg05_AA_01656ctg11-1_AA_00231ctg11-2_AA_01504ctg26_AA_00451ctg33_AA_00233ctg02_AA_00360ctg02_AA_00370ctg02_AA_00371ctg02_AA_00394											F.velutipes
ctg02_AA_00477												F.velutipes
ctg02_AA_00478												F.velutipes
ctg02_AA_00479												F.velutipes
ctg02_AA_00480												F.velutipes
ctg02_AA_00481		XP_003035756.1								XP_660557.1		Dikarya
ctg02_AA_00482	ctg05_AA_01656ctg11-1_AA_00231ctg11-2_AA_01504ctg26_AA_00451ctg33_AA_00233ctg02_AA_00360ctg02_AA_00370ctg02_AA_00371ctg02_AA_00378ctg02_AA_00394ctg02_AA_00476											F.velutipes
ctg02_AA_00483	ctg02_AA_00484ctg11-1_AA_00231ctg33_AA_00234ctg02_AA_00394											F.velutipes
ctg02_AA_00484	ctg11-1_AA_00231ctg26_AA_00451ctg33_AA_00234ctg02_AA_00383ctg02_AA_00394ctg02_AA_00483		XP_001839478.1	XP_001883366.1								Agaricales
ctg02_AA_00485	ctg11-1_AA_00990ctg02_AA_00376											F.velutipes
ctg02_AA_00486	ctg02_AA_00417											F.velutipes
ctg02_AA_00487	ctg06_AA_00187ctg02_AA_00418											F.velutipes
ctg02_AA_00488	ctg02_AA_00489ctg06_AA_00185ctg06_AA_00186ctg02_AA_00419ctg02_AA_00420											F.velutipes
ctg02_AA_00489	ctg06_AA_00185ctg06_AA_00186ctg02_AA_00419ctg02_AA_00420ctg02_AA_00488											F.velutipes
ctg02_AA_00490	ctg06_AA_00184ctg02_AA_00421	XP_003028114.1	XP_001834004.2	XP_001879981.1								Agaricales
ctg02_AA_00491	ctg02_AA_00494ctg02_AA_00563ctg06_AA_00182ctg06_AA_00183ctg06_AA_00189ctg02_AA_00416ctg02_AA_00422ctg02_AA_00423ctg02_AA_00425			XP_001875634.1								Agaricales
ctg02_AA_00492	ctg02_AA_00494ctg06_AA_00182ctg02_AA_00425											F.velutipes
ctg02_AA_00493	ctg06_AA_00181ctg02_AA_00424											F.velutipes
ctg02_AA_00494	ctg02_AA_00563ctg06_AA_00182ctg06_AA_00183ctg06_AA_00189ctg02_AA_00416ctg02_AA_00422ctg02_AA_00423ctg02_AA_00425ctg02_AA_00491ctg02_AA_00492											F.velutipes
ctg02_AA_00495	ctg06_AA_00180ctg02_AA_00426	XP_003028108.1	XP_001834210.2	XP_001879995.1		XP_002476225.1	XP_571500.1	XP_760311.1				Basidiomycota
ctg02_AA_00496	ctg06_AA_00179	XP_003030402.1	XP_001829683.2 XP_001829648.2	XP_001884630.1 XP_001876144.1		XP_002471769.1						Agaricomycetes
ctg02_AA_00497	ctg06_AA_00064ctg06_AA_00098ctg06_AA_00177ctg06_AA_00178ctg33_AA_00884ctg02_AA_00429											F.velutipes
ctg02_AA_00498	ctg06_AA_00176ctg02_AA_00430	XP_003028426.1		XP_001879732.1	Pha_66216		XP_572134.1	XP_758487.1	NP_116665.1	XP_681968.1	XP_965550.1	Dikarya
ctg02_AA_00499	ctg06_AA_00175ctg02_AA_00431											F.velutipes
ctg02_AA_00500	ctg06_AA_00174ctg02_AA_00432											F.velutipes
ctg02_AA_00501	ctg06_AA_00173ctg02_AA_00433	XP_003028136.1	XP_001833989.1	XP_001879956.1	Pha_75368		XP_569674.1	XP_757336.1	NP_009398.1	XP_658766.1	XP_959625.1	Dikarya
ctg02_AA_00502	ctg06_AA_00172ctg02_AA_00434	XP_003028137.1	XP_001833990.2	XP_001879955.1								Agaricales
ctg02_AA_00503	ctg06_AA_00171ctg02_AA_00435	XP_003039030.1			Pha_72121	XP_002474788.1			NP_014064.1NP_116594.1	XP_664025.1XP_663015.1	XP_957035.2	Dikarya
ctg02_AA_00504	ctg06_AA_00170ctg02_AA_00436	XP_003028138.1	XP_001833992.1	XP_001879954.1			XP_571530.1	XP_757779.1				Basidiomycota
ctg02_AA_00505	ctg06_AA_00169ctg02_AA_00437											F.velutipes
ctg02_AA_00506	ctg02_AA_00438	XP_003028437.1	XP_001833987.2	XP_001879182.1						XP_660244.1		Dikarya
ctg02_AA_00507	ctg06_AA_00167ctg02_AA_00439											F.velutipes
ctg02_AA_00508	ctg06_AA_00166ctg02_AA_00440					XP_002472555.1XP_002476276.1						Agaricomycetes
ctg02_AA_00509	ctg06_AA_00165ctg02_AA_00441											F.velutipes
ctg02_AA_00510	ctg06_AA_00164ctg02_AA_00442	XP_003028429.1		XP_001879705.1	Pha_75371		XP_570596.1	XP_759959.1	NP_010744.1	XP_659892.1	XP_956772.2	Dikarya
ctg02_AA_00511	ctg03_AA_00179ctg03_AA_01262ctg05_AA_00348ctg05_AA_00941ctg05_AA_00946ctg05_AA_00973ctg05_AA_00981ctg05_AA_00984ctg06_AA_00163ctg11-2_AA_00011ctg11-2_AA_00564ctg29_AA_00138ctg02_AA_00109											F.velutipes
ctg02_AA_00512	ctg06_AA_00162ctg02_AA_00443ctg02_AA_00444											F.velutipes
ctg02_AA_00513	ctg02_AA_00519ctg02_AA_00522ctg02_AA_00529ctg02_AA_00536ctg06_AA_00069ctg06_AA_00123ctg06_AA_00139ctg06_AA_00145ctg06_AA_00152ctg06_AA_00155ctg06_AA_00161ctg02_AA_00445ctg02_AA_00451ctg02_AA_00461ctg02_AA_00468	XP_003029311.1					XP_572061.1	XP_760258.1		XP_664765.1XP_661807.1	XP_963883.1	Dikarya
ctg02_AA_00514	ctg06_AA_00160ctg02_AA_00446	XP_003030492.1XP_003032061.1XP_003026456.1XP_003026455.1	XP_001831939.1 XP_001831963.1	XP_001885054.1XP_001885143.1	Pha_68728	XP_002474177.1XP_002476484.1		XP_758217.1	NP_012815.1	XP_660319.1 XP_659200.1		Dikarya
ctg02_AA_00515	ctg06_AA_00159ctg02_AA_00447											F.velutipes
ctg02_AA_00516	ctg06_AA_00158ctg02_AA_00448											F.velutipes
ctg02_AA_00517												F.velutipes
ctg02_AA_00518	ctg06_AA_00156ctg02_AA_00450			XP_001882714.1								Agaricales
ctg02_AA_00519	ctg02_AA_00522ctg02_AA_00529ctg02_AA_00536ctg06_AA_00069ctg06_AA_00123ctg06_AA_00139ctg06_AA_00145ctg06_AA_00152ctg06_AA_00155ctg06_AA_00161ctg02_AA_00445ctg02_AA_00451ctg02_AA_00461ctg02_AA_00468ctg02_AA_00513	XP_003029311.1					XP_572061.1	XP_760258.1		XP_664765.1XP_661807.1	XP_963883.1	Dikarya
ctg02_AA_00520	ctg06_AA_00154ctg02_AA_00452											F.velutipes
ctg02_AA_00521	ctg06_AA_00153ctg02_AA_00453											F.velutipes
ctg02_AA_00522	ctg02_AA_00529ctg02_AA_00536ctg06_AA_00069ctg06_AA_00123ctg06_AA_00152ctg06_AA_00155ctg06_AA_00161ctg02_AA_00445ctg02_AA_00451ctg02_AA_00461ctg02_AA_00468ctg02_AA_00513ctg02_AA_00519	XP_003028438.1	XP_001833995.1	XP_001875076.1	Pha_75335			XP_758096.1				Basidiomycota
ctg02_AA_00523	ctg02_AA_00527ctg06_AA_00147ctg06_AA_00151ctg02_AA_00455ctg02_AA_00459											F.velutipes
ctg02_AA_00524	ctg02_AA_00530ctg05_AA_01753ctg06_AA_00124ctg06_AA_00139ctg06_AA_00145ctg11-1_AA_00322ctg11-2_AA_01280ctg33_AA_01107ctg01_AA_00523ctg02_AA_00178ctg02_AA_00456ctg02_AA_00462ctg02_AA_00469											F.velutipes
ctg02_AA_00525	ctg02_AA_00530ctg06_AA_00124ctg06_AA_00149ctg11-2_AA_01280ctg33_AA_01107ctg02_AA_00178ctg02_AA_00457ctg02_AA_00462ctg02_AA_00469											F.velutipes
ctg02_AA_00526	ctg02_AA_00531ctg02_AA_00538ctg03_AA_01255ctg05_AA_01754ctg06_AA_00125ctg06_AA_00129ctg06_AA_00138ctg06_AA_00144ctg06_AA_00148ctg11-1_AA_00321ctg11-2_AA_00806ctg11-2_AA_01281ctg01_AA_00524ctg01_AA_00553ctg01_AA_00554ctg02_AA_00458ctg02_AA_00463ctg02_AA_00470											F.velutipes
ctg02_AA_00527	ctg02_AA_00533ctg06_AA_00141ctg06_AA_00147ctg06_AA_00151ctg02_AA_00455ctg02_AA_00459ctg02_AA_00465ctg02_AA_00523											F.velutipes
ctg02_AA_00528	ctg06_AA_00146ctg02_AA_00460											F.velutipes
ctg02_AA_00529	ctg02_AA_00536ctg06_AA_00069ctg06_AA_00123ctg06_AA_00139ctg06_AA_00145ctg06_AA_00152ctg06_AA_00155ctg06_AA_00161ctg02_AA_00445ctg02_AA_00451ctg02_AA_00461ctg02_AA_00468ctg02_AA_00513ctg02_AA_00519ctg02_AA_00522											F.velutipes
ctg02_AA_00530	ctg05_AA_01753ctg06_AA_00124ctg06_AA_00139ctg06_AA_00145ctg06_AA_00149ctg11-1_AA_00322ctg11-2_AA_01280ctg33_AA_01107ctg01_AA_00523ctg02_AA_00178ctg02_AA_00456ctg02_AA_00457ctg02_AA_00462ctg02_AA_00469ctg02_AA_00524ctg02_AA_00525											F.velutipes
ctg02_AA_00531	ctg02_AA_00538ctg03_AA_01255ctg05_AA_01754ctg06_AA_00125ctg06_AA_00129ctg06_AA_00138ctg06_AA_00144ctg11-1_AA_00321ctg11-2_AA_00806ctg11-2_AA_01281ctg13_AA_00378ctg01_AA_00524ctg01_AA_00553ctg01_AA_00554ctg02_AA_00458ctg02_AA_00463ctg02_AA_00470ctg02_AA_00526											F.velutipes
ctg02_AA_00532	ctg06_AA_00143ctg02_AA_00464											F.velutipes
ctg02_AA_00533	ctg02_AA_00540ctg06_AA_00141ctg06_AA_00147ctg02_AA_00459ctg02_AA_00465ctg02_AA_00472ctg02_AA_00527											F.velutipes
ctg02_AA_00534	ctg06_AA_00141ctg02_AA_00466											F.velutipes
ctg02_AA_00535	ctg06_AA_00140ctg02_AA_00467											F.velutipes
ctg02_AA_00536	ctg06_AA_00069ctg06_AA_00123ctg06_AA_00139ctg06_AA_00145ctg06_AA_00152ctg06_AA_00155ctg06_AA_00161ctg02_AA_00445ctg02_AA_00451ctg02_AA_00461ctg02_AA_00468ctg02_AA_00513ctg02_AA_00519ctg02_AA_00522ctg02_AA_00529	XP_003029311.1					XP_572061.1	XP_760258.1		XP_664765.1XP_661807.1	XP_963883.1	Dikarya
ctg02_AA_00537												F.velutipes
ctg02_AA_00538	ctg03_AA_01255ctg05_AA_01754ctg06_AA_00125ctg06_AA_00129ctg06_AA_00138ctg06_AA_00144ctg11-1_AA_00321ctg11-2_AA_00806ctg11-2_AA_01281ctg13_AA_00378ctg01_AA_00524ctg01_AA_00553ctg01_AA_00554ctg02_AA_00458ctg02_AA_00463ctg02_AA_00470ctg02_AA_00526ctg02_AA_00531											F.velutipes
ctg02_AA_00539	ctg06_AA_00137ctg02_AA_00471											F.velutipes
ctg02_AA_00540	ctg06_AA_00141ctg02_AA_00465ctg02_AA_00472ctg02_AA_00533											F.velutipes
ctg02_AA_00541	ctg05_AA_00202ctg05_AA_00203ctg06_AA_00135ctg13_AA_00065ctg13_AA_00084ctg26_AA_00254ctg29_AA_00778ctg01_AA_00492ctg02_AA_00473			XP_001890792.1XP_001884769.1XP_001877162.1XP_001874476.1								Agaricales
ctg02_AA_00542	ctg02_AA_00474											F.velutipes
ctg02_AA_00543	ctg26_AA_00404	XP_003030232.1	XP_001828296.2	XP_001875818.1	Pha_78476							Agaricomycetes
ctg02_AA_00544	ctg06_AA_00205ctg02_AA_00399											F.velutipes
ctg02_AA_00545	ctg06_AA_00204ctg02_AA_00400											F.velutipes
ctg02_AA_00546	ctg05_AA_00236ctg06_AA_00203ctg06_AA_00223ctg02_AA_00401											F.velutipes
ctg02_AA_00547	ctg06_AA_00202ctg02_AA_00402	XP_003032123.1	XP_001840496.2 XP_001840497.2	XP_001881872.1XP_001877570.1	Pha_95856	XP_002475523.1				XP_658068.1	XP_956238.1XP_961705.1	Dikarya
ctg02_AA_00548	ctg06_AA_00201ctg02_AA_00403											F.velutipes
ctg02_AA_00549	ctg06_AA_00200ctg02_AA_00404											F.velutipes
ctg02_AA_00550												F.velutipes
ctg02_AA_00551	ctg06_AA_00199ctg02_AA_00405	XP_003028400.1	XP_002910397.1	XP_001879743.1	Pha_78305							Agaricomycetes
ctg02_AA_00552				XP_001882516.1	Pha_28115	XP_002469927.1						Agaricomycetes
ctg02_AA_00553	ctg02_AA_00406	XP_003028401.1	XP_001834166.1	XP_001879741.1	Pha_31042		XP_568808.1	XP_759731.1	NP_014151.1	XP_659887.1	XP_957125.1	Dikarya
ctg02_AA_00554	ctg06_AA_00198ctg02_AA_00407	XP_003038470.1		XP_001888457.1								Agaricales
ctg02_AA_00555	ctg02_AA_00556ctg02_AA_00558ctg06_AA_00191ctg06_AA_00196ctg06_AA_00197ctg11-2_AA_01536ctg11-2_AA_01538ctg02_AA_00408ctg02_AA_00409ctg02_AA_00411ctg02_AA_00414											F.velutipes
ctg02_AA_00556	ctg02_AA_00558ctg06_AA_00191ctg06_AA_00196ctg06_AA_00197ctg11-2_AA_01536ctg11-2_AA_01537ctg11-2_AA_01538ctg02_AA_00408ctg02_AA_00409ctg02_AA_00411ctg02_AA_00414ctg02_AA_00555											F.velutipes
ctg02_AA_00557												F.velutipes
ctg02_AA_00558	ctg06_AA_00191ctg06_AA_00196ctg06_AA_00197ctg11-2_AA_01536ctg11-2_AA_01538ctg02_AA_00408ctg02_AA_00409ctg02_AA_00410ctg02_AA_00411ctg02_AA_00414ctg02_AA_00555ctg02_AA_00556											F.velutipes
ctg02_AA_00559												F.velutipes
ctg02_AA_00560	ctg06_AA_00192ctg02_AA_00413											F.velutipes
ctg02_AA_00561	ctg11-2_AA_01541											F.velutipes
ctg02_AA_00562	ctg02_AA_00567ctg06_AA_00190ctg02_AA_00415ctg02_AA_00417											F.velutipes
ctg02_AA_00563	ctg06_AA_00182ctg06_AA_00183ctg06_AA_00189ctg02_AA_00416ctg02_AA_00422ctg02_AA_00423ctg02_AA_00425ctg02_AA_00491ctg02_AA_00494											F.velutipes
ctg02_AA_00564												F.velutipes
ctg02_AA_00565	ctg06_AA_00188											F.velutipes
ctg02_AA_00566												F.velutipes
ctg02_AA_00567	ctg06_AA_00190ctg02_AA_00415ctg02_AA_00417ctg02_AA_00562											F.velutipes
ctg03_AA_00001	ctg05_AA_00201ctg13_AA_00086ctg26_AA_00326ctg01_AA_00490ctg01_AA_00585											F.velutipes
ctg03_AA_00002	ctg05_AA_01845											F.velutipes
ctg03_AA_00003	ctg11-1_AA_00002ctg11-1_AA_00675ctg11-2_AA_00095ctg13_AA_00098ctg29_AA_00035											F.velutipes
ctg03_AA_00004	ctg05_AA_01843ctg11-1_AA_00637ctg11-1_AA_00674ctg11-2_AA_00094ctg13_AA_00473ctg26_AA_00334ctg29_AA_00928											F.velutipes
ctg03_AA_00005	ctg05_AA_00469ctg11-2_AA_00097ctg11-2_AA_01613											F.velutipes
ctg03_AA_00006	ctg05_AA_01842ctg11-2_AA_00093ctg11-2_AA_01612											F.velutipes
ctg03_AA_00007	ctg05_AA_00294ctg05_AA_01590ctg05_AA_01593ctg11-1_AA_00626ctg11-2_AA_01612											F.velutipes
ctg03_AA_00008		XP_003030367.1										Agaricales
ctg03_AA_00009	ctg05_AA_01587ctg05_AA_01588ctg11-2_AA_01608ctg13_AA_00853ctg13_AA_00854ctg26_AA_00335ctg33_AA_00076											F.velutipes
ctg03_AA_00010	ctg11-1_AA_00662ctg11-2_AA_01607											F.velutipes
ctg03_AA_00011	ctg05_AA_00293ctg05_AA_00489ctg05_AA_01285ctg06_AA_00558ctg06_AA_00613ctg11-1_AA_00662ctg11-2_AA_01303ctg11-2_AA_01606ctg29_AA_00166ctg33_AA_00076											F.velutipes
ctg03_AA_00012	ctg11-1_AA_00661ctg11-2_AA_01605											F.velutipes
ctg03_AA_00013	ctg06_AA_00732ctg06_AA_00757											F.velutipes
ctg03_AA_00014		XP_003025976.1	XP_001835201.1	XP_001879248.1	Pha_74495		XP_569732.1	XP_760998.1	NP_012255.1	XP_661905.1	XP_001728081.1	Dikarya
ctg03_AA_00015	ctg05_AA_00012ctg05_AA_00425ctg05_AA_01292ctg11-1_AA_00654ctg11-1_AA_01445ctg11-2_AA_00091ctg13_AA_00464ctg13_AA_00471ctg13_AA_00855			XP_001882447.1	Pha_78844Pha_97369Pha_96685Pha_96337Pha_96686Pha_96417Pha_96876Pha_94858Pha_95361		XP_571377.1		NP_011624.1	XP_663074.1XP_662846.1XP_660275.1XP_660274.1		Dikarya
ctg03_AA_00016	ctg03_AA_01111ctg05_AA_00013ctg05_AA_01788ctg05_AA_01834ctg06_AA_00006ctg06_AA_00007ctg06_AA_00292ctg06_AA_00293ctg06_AA_00296ctg06_AA_00731ctg06_AA_00732ctg06_AA_00736ctg06_AA_00739ctg06_AA_00746ctg06_AA_00749ctg06_AA_00757ctg06_AA_00758ctg06_AA_00767ctg06_AA_00771ctg06_AA_00794ctg11-2_AA_01513ctg11-2_AA_01525ctg11-2_AA_01529ctg13_AA_00022ctg13_AA_00054ctg13_AA_00967ctg01_AA_00243ctg01_AA_00597c…											F.velutipes
ctg03_AA_00017												F.velutipes
ctg03_AA_00018		XP_003026149.1				XP_002473965.1						Agaricomycetes
ctg03_AA_00019	ctg05_AA_01635ctg11-1_AA_00739	XP_003039008.1 XP_003029269.1	XP_001836370.2XP_001836368.1XP_001836369.1XP_001841626.1XP_001836367.2		Pha_65956Pha_64744Pha_79139Pha_71868Pha_65949					XP_662780.1XP_658098.1	XP_962498.1	Dikarya
ctg03_AA_00020												F.velutipes
ctg03_AA_00021	ctg05_AA_00077											F.velutipes
ctg03_AA_00022												F.velutipes
ctg03_AA_00023												F.velutipes
ctg03_AA_00024												F.velutipes
ctg03_AA_00025	ctg03_AA_00131ctg11-2_AA_01099ctg11-2_AA_01100											F.velutipes
ctg03_AA_00026	ctg03_AA_00027ctg03_AA_00028ctg03_AA_00038ctg03_AA_00047ctg03_AA_00135ctg03_AA_00140ctg03_AA_01111ctg05_AA_01788ctg05_AA_01834ctg06_AA_00003ctg06_AA_00292ctg06_AA_00293ctg06_AA_00732ctg06_AA_00739ctg11-2_AA_01005ctg11-2_AA_01513ctg13_AA_00022ctg13_AA_00554ctg02_AA_00047ctg02_AA_00074											F.velutipes
ctg03_AA_00027	ctg03_AA_00028ctg03_AA_00038ctg03_AA_00047ctg03_AA_00135ctg03_AA_00140ctg11-2_AA_01005ctg13_AA_00554ctg03_AA_00026											F.velutipes
ctg03_AA_00028	ctg03_AA_00038ctg03_AA_00047ctg03_AA_00135ctg03_AA_00140ctg11-2_AA_01005ctg13_AA_00554ctg03_AA_00026ctg03_AA_00027											F.velutipes
ctg03_AA_00029												F.velutipes
ctg03_AA_00030												F.velutipes
ctg03_AA_00031	ctg03_AA_00034ctg03_AA_00051ctg03_AA_00052ctg03_AA_00975ctg13_AA_00657											F.velutipes
ctg03_AA_00032	ctg03_AA_00035ctg03_AA_00054ctg03_AA_00055ctg03_AA_00193ctg03_AA_00201											F.velutipes
ctg03_AA_00033	ctg03_AA_00036ctg03_AA_00050											F.velutipes
ctg03_AA_00034	ctg03_AA_00051ctg03_AA_00052ctg03_AA_00975ctg13_AA_00657ctg03_AA_00031											F.velutipes
ctg03_AA_00035	ctg03_AA_00054ctg03_AA_00055ctg03_AA_00193ctg03_AA_00201ctg03_AA_00032											F.velutipes
ctg03_AA_00036	ctg03_AA_00033											F.velutipes
ctg03_AA_00037		XP_003037618.1	XP_002912083.1	XP_001881386.1	Pha_71763		XP_567976.1	XP_762508.1	NP_116652.1			Dikarya
ctg03_AA_00038	ctg03_AA_00047ctg03_AA_00135ctg03_AA_00140ctg03_AA_00026ctg03_AA_00027ctg03_AA_00028											F.velutipes
ctg03_AA_00039	ctg03_AA_00046											F.velutipes
ctg03_AA_00040												F.velutipes
ctg03_AA_00041												F.velutipes
ctg03_AA_00042		XP_003032342.1	XP_001836328.1	XP_001880905.1	Pha_68456	XP_002468740.1						Agaricomycetes
ctg03_AA_00043		XP_003032177.1	XP_001838493.1	XP_001878752.1	Pha_72182	XP_002471534.1 XP_002474673.1	XP_567012.1	XP_758855.1	NP_012582.1 NP_010875.1	XP_663850.1	XP_956486.2	Dikarya
ctg03_AA_00044												F.velutipes
ctg03_AA_00045												F.velutipes
ctg03_AA_00046	ctg03_AA_00039											F.velutipes
ctg03_AA_00047	ctg03_AA_00135ctg03_AA_00140ctg03_AA_00026ctg03_AA_00027ctg03_AA_00028ctg03_AA_00038											F.velutipes
ctg03_AA_00048												F.velutipes
ctg03_AA_00049												F.velutipes
ctg03_AA_00050	ctg03_AA_00198ctg13_AA_00532ctg03_AA_00033	XP_003033832.1 XP_003031618.1 XP_003033834.1	XP_001838896.2	Lacc XP_001882382.1 Lacc XP_001882304.1	Pha_78291Pha_66662Pha_66663Pha_29887	XP_002469850.1 XP_002471552.1	XP_567888.1	XP_759153.1		XP_682002.1 XP_661018.1 XP_659174.1		Dikarya
ctg03_AA_00051	ctg03_AA_00052ctg03_AA_00031ctg03_AA_00034											F.velutipes
ctg03_AA_00052	ctg03_AA_00975ctg13_AA_00335ctg13_AA_00337ctg13_AA_00657ctg13_AA_00660ctg03_AA_00031ctg03_AA_00034ctg03_AA_00051											F.velutipes
ctg03_AA_00053												F.velutipes
ctg03_AA_00054	ctg03_AA_00055ctg03_AA_00201ctg03_AA_00032ctg03_AA_00035											F.velutipes
ctg03_AA_00055	ctg03_AA_00032ctg03_AA_00035ctg03_AA_00054											F.velutipes
ctg03_AA_00056												F.velutipes
ctg03_AA_00057												F.velutipes
ctg03_AA_00058												F.velutipes
ctg03_AA_00059												F.velutipes
ctg03_AA_00060												F.velutipes
ctg03_AA_00061	ctg03_AA_00063ctg03_AA_01318	XP_003034758.1	XP_001829407.2 XP_001839823.2 XP_001833776.2	XP_001878530.1	Pha_74240 Pha_74259	XP_002470639.1						Agaricomycetes
ctg03_AA_00062	ctg11-2_AA_00495	XP_003035306.1	XP_001833162.2		Pha_77125							Agaricomycetes
ctg03_AA_00063	ctg03_AA_01318ctg03_AA_00061											F.velutipes
ctg03_AA_00064												F.velutipes
ctg03_AA_00065												F.velutipes
ctg03_AA_00066												F.velutipes
ctg03_AA_00067												F.velutipes
ctg03_AA_00068												F.velutipes
ctg03_AA_00069			XP_001836732.1	XP_001880835.1 XP_001877804.1								Agaricales
ctg03_AA_00070	ctg05_AA_00310ctg11-1_AA_00751											F.velutipes
ctg03_AA_00071												F.velutipes
ctg03_AA_00072	ctg13_AA_00703		XP_001833916.2					XP_759024.1		XP_662420.1		Dikarya
ctg03_AA_00073												F.velutipes
ctg03_AA_00074		XP_003032582.1	XP_002912062.1	XP_001888730.1		XP_002469015.1						Agaricomycetes
ctg03_AA_00075	ctg03_AA_00076ctg33_AA_00813ctg33_AA_00837											F.velutipes
ctg03_AA_00076	ctg33_AA_00813ctg33_AA_00837ctg03_AA_00075											F.velutipes
ctg03_AA_00077	ctg05_AA_00186ctg11-1_AA_00757			XP_001884674.1								Agaricales
ctg03_AA_00078												F.velutipes
ctg03_AA_00079	ctg05_AA_00204ctg11-1_AA_00755											F.velutipes
ctg03_AA_00080	ctg05_AA_01414ctg13_AA_00088ctg13_AA_00767ctg01_AA_00589ctg01_AA_00592											F.velutipes
ctg03_AA_00081	ctg05_AA_00205ctg05_AA_01160ctg05_AA_01413ctg11-1_AA_00756ctg01_AA_00591											F.velutipes
ctg03_AA_00082	ctg05_AA_00185ctg05_AA_00206ctg11-1_AA_00754											F.velutipes
ctg03_AA_00083	ctg11-1_AA_00753											F.velutipes
ctg03_AA_00084												F.velutipes
ctg03_AA_00085												F.velutipes
ctg03_AA_00086		XP_003034808.1	XP_001841160.1	XP_001882813.1	Pha_72026		XP_567751.1	XP_761612.1	NP_014346.1 NP_012155.1	XP_659920.1	XP_963448.1	Dikarya
ctg03_AA_00087	ctg03_AA_00208											F.velutipes
ctg03_AA_00088	ctg03_AA_00210ctg03_AA_00212ctg03_AA_00214ctg03_AA_00220ctg13_AA_00423ctg13_AA_00424											F.velutipes
ctg03_AA_00089	ctg05_AA_00018ctg06_AA_00011ctg06_AA_00019ctg06_AA_00027ctg26_AA_00526											F.velutipes
ctg03_AA_00090												F.velutipes
ctg03_AA_00091	ctg03_AA_00205ctg03_AA_00207ctg05_AA_00273ctg05_AA_00276ctg29_AA_00055ctg02_AA_00333											F.velutipes
ctg03_AA_00092	ctg29_AA_00763											F.velutipes
ctg03_AA_00093	ctg03_AA_00103ctg03_AA_00217ctg05_AA_01402											F.velutipes
ctg03_AA_00094												F.velutipes
ctg03_AA_00095												F.velutipes
ctg03_AA_00096			XP_002910722.1	XP_001884751.1	Pha_66328		XP_567774.1					Basidiomycota
ctg03_AA_00097	ctg06_AA_00217ctg06_AA_00229ctg06_AA_00235ctg06_AA_00242ctg06_AA_00246ctg06_AA_00255ctg06_AA_00257ctg01_AA_00391											F.velutipes
ctg03_AA_00098	ctg01_AA_00392											F.velutipes
ctg03_AA_00099												F.velutipes
ctg03_AA_00100												F.velutipes
ctg03_AA_00101		XP_003030854.1 XP_003027266.1	XP_001828572.2	XP_001881068.1	Pha_74104Pha_28402	XP_002473053.1	XP_568294.1	XP_761493.1 XP_758651.1		XP_659031.1	XP_958355.1	Dikarya
ctg03_AA_00102												F.velutipes
ctg03_AA_00103	ctg03_AA_00217ctg05_AA_01402ctg03_AA_00093											F.velutipes
ctg03_AA_00104		XP_003037704.1	XP_001828571.1	XP_001889055.1	Pha_71700		XP_571441.1	XP_762540.1	NP_015353.1	XP_659883.1	XP_961017.1	Dikarya
ctg03_AA_00105		XP_003037703.1	XP_002912086.1	XP_001889056.1	Pha_71702		XP_569944.1	XP_761026.1	NP_012597.1		XP_961788.1	Dikarya
ctg03_AA_00106												F.velutipes
ctg03_AA_00107												F.velutipes
ctg03_AA_00108		XP_003037699.1	XP_001828575.2	XP_001873679.1	Pha_71747		XP_571185.1					Basidiomycota
ctg03_AA_00109		XP_003025939.1	XP_002912088.1	XP_001888657.1		XP_002469054.1	XP_567799.1	XP_759624.1		XP_660062.1	XP_960668.2	Dikarya
ctg03_AA_00110												F.velutipes
ctg03_AA_00111												F.velutipes
ctg03_AA_00112												F.velutipes
ctg03_AA_00113												F.velutipes
ctg03_AA_00114			XP_001834897.2	XP_001890618.1								Agaricales
ctg03_AA_00115	ctg03_AA_00117											F.velutipes
ctg03_AA_00116		XP_003025918.1	XP_001828363.1	XP_001888693.1	Pha_63547							Agaricomycetes
ctg03_AA_00117	ctg03_AA_00115											F.velutipes
ctg03_AA_00118												F.velutipes
ctg03_AA_00119												F.velutipes
ctg03_AA_00120	ctg11-1_AA_00663ctg26_AA_00037ctg01_AA_00220											F.velutipes
ctg03_AA_00121												F.velutipes
ctg03_AA_00122	ctg03_AA_00124ctg03_AA_00204ctg03_AA_00206ctg03_AA_00215ctg11-2_AA_00153	XP_003036972.1 XP_003038325.1	XP_001841274.1		Pha_97466 Pha_71904	XP_002471549.1 XP_002471871.1 XP_002474688.1	XP_568494.1			XP_682223.1	XP_960250.1	Dikarya
ctg03_AA_00123												F.velutipes
ctg03_AA_00124	ctg03_AA_00204ctg03_AA_00206ctg03_AA_00215ctg11-2_AA_00153ctg03_AA_00122									XP_682601.1		Ascomycota
ctg03_AA_00125												F.velutipes
ctg03_AA_00126		XP_003032551.1	XP_001839916.2	XP_001890743.1 XP_001889283.1								Agaricales
ctg03_AA_00127		XP_003038000.1	XP_001840543.2									Agaricales
ctg03_AA_00128												F.velutipes
ctg03_AA_00129				XP_001879789.1								Agaricales
ctg03_AA_00130		XP_003030149.1				XP_002473312.1						Agaricomycetes
ctg03_AA_00131	ctg03_AA_00025		XP_001839260.2									Agaricales
ctg03_AA_00132	ctg03_AA_00144											F.velutipes
ctg03_AA_00133		XP_003027520.1		XP_001881405.1								Agaricales
ctg03_AA_00134	ctg03_AA_00149											F.velutipes
ctg03_AA_00135	ctg03_AA_00140ctg03_AA_00026ctg03_AA_00027ctg03_AA_00028ctg03_AA_00038ctg03_AA_00047											F.velutipes
ctg03_AA_00136	ctg11-1_AA_00375ctg11-1_AA_00376ctg13_AA_00015											F.velutipes
ctg03_AA_00137		XP_003026555.1	XP_001828515.2	XP_001881201.1	Pha_97395		XP_570941.1	XP_760009.1	NP_014403.1	XP_659675.1	XP_957630.2	Dikarya
ctg03_AA_00138	ctg11-2_AA_00830	XP_003037684.1 XP_003026267.1	XP_001841218.1XP_001828577.2	XP_001884255.1XP_001881394.1	Pha_78498Pha_71759	XP_002469050.1	XP_571468.1XP_570943.1	XP_762303.1XP_760010.1	NP_014759.1NP_010141.1	XP_660116.1XP_658413.1	XP_956571.2XP_964097.1	Dikarya
ctg03_AA_00139	ctg05_AA_01621ctg05_AA_01625											F.velutipes
ctg03_AA_00140	ctg03_AA_00026ctg03_AA_00027ctg03_AA_00028ctg03_AA_00038ctg03_AA_00047ctg03_AA_00135											F.velutipes
ctg03_AA_00141												F.velutipes
ctg03_AA_00142												F.velutipes
ctg03_AA_00143												F.velutipes
ctg03_AA_00144	ctg03_AA_00132											F.velutipes
ctg03_AA_00145		XP_003037678.1	XP_001828385.2	XP_001888661.1 XP_001877595.1			XP_571370.1	XP_760283.1	NP_009934.1	XP_682099.1	XP_962991.1	Dikarya
ctg03_AA_00146	ctg06_AA_00449ctg26_AA_00027ctg29_AA_00778ctg33_AA_00848		XP_001832963.2	XP_001886939.1	Pha_66428	XP_002472900.1						Agaricomycetes
ctg03_AA_00147	ctg29_AA_00777											F.velutipes
ctg03_AA_00148												F.velutipes
ctg03_AA_00149	ctg03_AA_00134											F.velutipes
ctg03_AA_00150	ctg33_AA_00322ctg33_AA_00323											F.velutipes
ctg03_AA_00151												F.velutipes
ctg03_AA_00152		XP_003026524.1		XP_001873669.1	Pha_71788							Agaricomycetes
ctg03_AA_00153	ctg03_AA_00154ctg03_AA_00160	XP_003031049.1 XP_003031050.1 XP_003034911.1 XP_003038873.1	XP_001828874.1 XP_001832921.2	XP_001878528.1	Pha_71098Pha_68221Pha_23314Pha_73290	XP_002476381.1XP_002473489.1	XP_571800.1			XP_660321.1	XP_963405.1XP_964248.2	Dikarya
ctg03_AA_00154	ctg03_AA_00160ctg03_AA_00153											F.velutipes
ctg03_AA_00155		XP_003035717.1	XP_001839156.2		Pha_100456		XP_567964.1	XP_757454.1	NP_011302.1	XP_658991.1	XP_955873.2	Dikarya
ctg03_AA_00156		XP_003026629.1	XP_001828508.1	XP_001874306.1	Pha_71777	XP_002469012.1	XP_567948.1	XP_757304.1				Basidiomycota
ctg03_AA_00157												F.velutipes
ctg03_AA_00158												F.velutipes
ctg03_AA_00159		XP_003026516.1	XP_001828509.1	XP_001873674.1	Pha_71778		XP_567863.1	XP_759985.1	NP_010183.1	XP_660513.1	XP_960897.1	Dikarya
ctg03_AA_00160	ctg03_AA_00153ctg03_AA_00154	XP_003031049.1 XP_003031050.1 XP_003034911.1 XP_003038873.1	XP_001828874.1 XP_001832921.2	XP_001878528.1	Pha_71098Pha_68221Pha_23314Pha_73290	XP_002476381.1XP_002473489.1	XP_571800.1			XP_660321.1	XP_963405.1XP_964248.2	Dikarya
ctg03_AA_00161		XP_003026632.1	XP_001828928.2		Pha_71775		XP_567305.1	XP_759921.1	NP_116664.1	XP_661919.1	XP_957666.1	Dikarya
ctg03_AA_00162			XP_001828922.2	XP_001873894.1						XP_662400.1		Dikarya
ctg03_AA_00163		XP_003026638.1	XP_001828924.1	XP_001873895.1	Pha_66262	XP_002470042.1	XP_572438.1	XP_757549.1	NP_011367.1	XP_663335.1	XP_963243.1	Dikarya
ctg03_AA_00164		XP_003026535.1	XP_001828925.1	XP_001873291.1								Agaricales
ctg03_AA_00165	ctg03_AA_01175	XP_003026538.1	XP_001828958.2 XP_001828926.1	XP_001873306.1 XP_001873292.1	Pha_76553					XP_662223.1	XP_959137.1	Dikarya
ctg03_AA_00166		XP_003026536.1	XP_001828923.2	XP_001873290.1	Pha_71780		XP_570186.1	XP_758021.1	NP_014387.1	XP_657643.1	XP_001728331.1	Dikarya
ctg03_AA_00167	ctg03_AA_01259ctg03_AA_01260	XP_003035307.1	XP_001830578.1 XP_001836013.2 XP_001830577.1	XP_001875692.1	Pha_73281Pha_66475Pha_74686	XP_002475239.1XP_002475952.1XP_002473472.1XP_002473125.1	XP_568365.1	XP_757940.1	NP_014068.1	XP_663491.1 XP_659220.1	XP_961973.2	Dikarya
ctg03_AA_00168												F.velutipes
ctg03_AA_00169	ctg03_AA_00170	XP_003026532.1	XP_001828491.2		Pha_69088	XP_002470038.1	XP_567714.1	XP_761648.1	NP_009670.1		XP_963316.1	Dikarya
ctg03_AA_00170	ctg03_AA_00169	XP_003026532.1	XP_001828491.2		Pha_69088	XP_002470038.1	XP_567714.1	XP_761648.1	NP_009670.1		XP_963316.1	Dikarya
ctg03_AA_00171				XP_001874305.1								Agaricales
ctg03_AA_00172		XP_003026635.1	XP_001828494.2	XP_001873668.1	Pha_66866	XP_002470000.1	XP_570985.1			XP_664786.1		Dikarya
ctg03_AA_00173		XP_003026531.1	XP_001828495.2	XP_001874304.1	Pha_66865	XP_002469009.1	XP_568594.1			XP_660576.1	XP_958279.1	Dikarya
ctg03_AA_00174	ctg33_AA_00208											F.velutipes
ctg03_AA_00175	ctg03_AA_00176											F.velutipes
ctg03_AA_00176	ctg03_AA_00175	XP_003026529.1	XP_001828496.2		Pha_26971		XP_572764.1	XP_758858.1		XP_663223.1	XP_963675.1	Dikarya
ctg03_AA_00177												F.velutipes
ctg03_AA_00178	ctg03_AA_00180ctg03_AA_00197ctg05_AA_00017											F.velutipes
ctg03_AA_00179	ctg03_AA_01262ctg05_AA_00348ctg05_AA_00941ctg05_AA_00946ctg05_AA_00973ctg05_AA_00981ctg05_AA_00984ctg06_AA_00163ctg11-2_AA_00011ctg11-2_AA_00564ctg29_AA_00138ctg29_AA_00142ctg02_AA_00109ctg02_AA_00511	XP_003026522.1 XP_003036375.1	XP_001834712.2	XP_001883073.1								Agaricales
ctg03_AA_00180	ctg03_AA_00197ctg05_AA_00017ctg03_AA_00178	XP_003029914.1	XP_001830452.2		Pha_65757	XP_002469411.1						Agaricomycetes
ctg03_AA_00181	ctg03_AA_00199											F.velutipes
ctg03_AA_00182												F.velutipes
ctg03_AA_00183												F.velutipes
ctg03_AA_00184	ctg03_AA_00185ctg03_AA_00188ctg03_AA_00189ctg03_AA_00191ctg11-1_AA_00445											F.velutipes
ctg03_AA_00185	ctg03_AA_00188ctg03_AA_00189ctg03_AA_00191ctg11-1_AA_00445ctg03_AA_00184											F.velutipes
ctg03_AA_00186	ctg11-2_AA_00136	XP_003034574.1 XP_003035118.1		Lacc XP_001878567.1 Lacc XP_001876290.1	Pha_69900		XP_572216.1	XP_756810.1	NP_011051.1	XP_658943.1	XP_957586.2	Dikarya
ctg03_AA_00187		XP_003039002.1	XP_001828937.2	XP_001873296.1	Pha_25511 Pha_23730	XP_002469062.1						Agaricomycetes
ctg03_AA_00188	ctg03_AA_00189ctg03_AA_00191ctg11-1_AA_00445ctg03_AA_00184ctg03_AA_00185											F.velutipes
ctg03_AA_00189	ctg03_AA_00191ctg11-1_AA_00445ctg11-1_AA_01419ctg11-1_AA_01420ctg03_AA_00184ctg03_AA_00185ctg03_AA_00188											F.velutipes
ctg03_AA_00190												F.velutipes
ctg03_AA_00191	ctg11-1_AA_00445ctg11-1_AA_01419ctg11-1_AA_01420ctg03_AA_00184ctg03_AA_00185ctg03_AA_00188ctg03_AA_00189	XP_003034073.1		XP_001885860.1	Pha_64848							Agaricomycetes
ctg03_AA_00192		XP_003026558.1	XP_001828528.1	XP_001881196.1								Agaricales
ctg03_AA_00193	ctg03_AA_00201ctg03_AA_00032ctg03_AA_00035											F.velutipes
ctg03_AA_00194		XP_003035047.1	XP_001833485.1	XP_001878652.1	Pha_98926		XP_568661.1	XP_757316.1	NP_010018.1 NP_014446.1	XP_662704.1	XP_961531.1	Dikarya
ctg03_AA_00195		XP_003029596.1	XP_001838602.1		Pha_28401					XP_868906.1	XP_958583.1 XP_965386.2	Dikarya
ctg03_AA_00196		XP_003026649.1		XP_001881379.1	Pha_68608	XP_002469055.1		XP_759599.1		XP_661396.1	XP_965044.1	Dikarya
ctg03_AA_00197	ctg05_AA_00017ctg03_AA_00178ctg03_AA_00180	XP_003029914.1	XP_001830452.2		Pha_65757	XP_002469411.1						Agaricomycetes
ctg03_AA_00198	ctg03_AA_00050											F.velutipes
ctg03_AA_00199	ctg03_AA_00216ctg06_AA_00391ctg03_AA_00181											F.velutipes
ctg03_AA_00200												F.velutipes
ctg03_AA_00201	ctg03_AA_00032ctg03_AA_00035ctg03_AA_00054ctg03_AA_00193											F.velutipes
ctg03_AA_00202												F.velutipes
ctg03_AA_00203		XP_003027522.1 XP_003026111.1	XP_001828377.2	XP_001888722.1	Pha_76141	XP_002470263.1		XP_758900.1		XP_681860.1	XP_958990.1	Dikarya
ctg03_AA_00204	ctg03_AA_00206ctg03_AA_00215ctg11-2_AA_00153ctg03_AA_00122ctg03_AA_00124	XP_003035435.1 XP_003032160.1 XP_003036253.1	XP_001833391.1		Pha_69638		XP_568952.1 XP_568953.1	XP_760015.1		XP_662212.1	XP_959079.1	Dikarya
ctg03_AA_00205	ctg03_AA_00207ctg05_AA_00273ctg05_AA_00276ctg29_AA_00055ctg02_AA_00333ctg03_AA_00091											F.velutipes
ctg03_AA_00206	ctg03_AA_00215ctg11-2_AA_00153ctg03_AA_00122ctg03_AA_00124ctg03_AA_00204											F.velutipes
ctg03_AA_00207	ctg05_AA_00273ctg05_AA_00276ctg29_AA_00055ctg02_AA_00333ctg03_AA_00091ctg03_AA_00205											F.velutipes
ctg03_AA_00208	ctg03_AA_00087											F.velutipes
ctg03_AA_00209	ctg03_AA_00211											F.velutipes
ctg03_AA_00210	ctg03_AA_00212ctg03_AA_00214ctg11-1_AA_00495ctg13_AA_00423ctg13_AA_00424ctg03_AA_00088											F.velutipes
ctg03_AA_00211	ctg03_AA_00209	XP_003026560.1	XP_001828513.2	XP_001873676.1	Pha_66718							Agaricomycetes
ctg03_AA_00212	ctg03_AA_00214ctg11-1_AA_00495ctg13_AA_00423ctg13_AA_00424ctg03_AA_00088ctg03_AA_00210											F.velutipes
ctg03_AA_00213												F.velutipes
ctg03_AA_00214	ctg11-1_AA_00495ctg13_AA_00423ctg13_AA_00424ctg03_AA_00088ctg03_AA_00210ctg03_AA_00212											F.velutipes
ctg03_AA_00215	ctg11-2_AA_00153ctg03_AA_00122ctg03_AA_00124ctg03_AA_00204ctg03_AA_00206											F.velutipes
ctg03_AA_00216	ctg06_AA_00391ctg03_AA_00199											F.velutipes
ctg03_AA_00217	ctg05_AA_01402ctg03_AA_00093ctg03_AA_00103											F.velutipes
ctg03_AA_00218		XP_003028391.1	XP_001833964.1	XP_001887340.1	Pha_78331	XP_002473873.1	XP_566972.1	XP_757253.1				Basidiomycota
ctg03_AA_00219												F.velutipes
ctg03_AA_00220	ctg03_AA_00088	XP_003035127.1		XP_001889503.1	Pha_78164	XP_002473494.1				XP_663965.1		Dikarya
ctg03_AA_00221												F.velutipes
ctg03_AA_00222			XP_001840422.1	XP_001880089.1								Agaricales
ctg03_AA_00223				XP_001888474.1								Agaricales
ctg03_AA_00224												F.velutipes
ctg03_AA_00225	ctg26_AA_00332											F.velutipes
ctg03_AA_00226												F.velutipes
ctg03_AA_00227												F.velutipes
ctg03_AA_00228	ctg02_AA_00379											F.velutipes
ctg03_AA_00229												F.velutipes
ctg03_AA_00230												F.velutipes
ctg03_AA_00231												F.velutipes
ctg03_AA_00232	ctg11-1_AA_00631ctg13_AA_00097ctg29_AA_00024ctg01_AA_00366ctg01_AA_00494											F.velutipes
ctg03_AA_00233	ctg01_AA_00364ctg01_AA_00495											F.velutipes
ctg03_AA_00234	ctg05_AA_01291ctg05_AA_01585ctg11-2_AA_01614ctg13_AA_00852ctg01_AA_00350											F.velutipes
ctg03_AA_00235	ctg05_AA_01290ctg11-1_AA_00632ctg11-2_AA_01615ctg13_AA_00475ctg29_AA_00023ctg01_AA_00351											F.velutipes
ctg03_AA_00236	ctg05_AA_00490ctg05_AA_01288ctg11-1_AA_01448ctg11-2_AA_01618ctg11-2_AA_01619ctg01_AA_00354ctg01_AA_00355											F.velutipes
ctg03_AA_00237	ctg05_AA_01282ctg06_AA_00134ctg06_AA_00136ctg06_AA_00248ctg06_AA_00560ctg11-1_AA_00625ctg11-2_AA_01611ctg13_AA_00659ctg02_AA_00034	XP_003029013.1	XP_001836620.2	XP_001878170.1XP_001887224.1XP_001887016.1	Pha_97083Pha_97424Pha_97302Pha_95686		XP_567971.1		NP_012184.1	XP_660220.1		Dikarya
ctg03_AA_00238												F.velutipes
ctg03_AA_00239	ctg03_AA_01294											F.velutipes
ctg03_AA_00240	ctg11-1_AA_00700	XP_003027177.1	XP_001838582.1 XP_001838508.1	XP_001880324.1 XP_001888990.1 XP_001880544.1	Pha_77337				NP_013040.1			Dikarya
ctg03_AA_00241			XP_001841159.2	XP_001888921.1	Pha_72027		XP_570872.1	XP_757003.1		XP_662715.1	XP_960605.1	Dikarya
ctg03_AA_00242		XP_003026322.1	XP_001829458.1	XP_001873554.1	Pha_94193	XP_002471048.1 XP_002474482.1	XP_569294.1	XP_761155.1		XP_664104.1	XP_962926.1	Dikarya
ctg03_AA_00243												F.velutipes
ctg03_AA_00244		XP_003030990.1	XP_001829521.2 XP_001829520.1	XP_001873573.1	Pha_71364							Agaricomycetes
ctg03_AA_00245		XP_003028164.1	XP_001829580.1		Pha_71427	XP_002471629.1	XP_566660.1	XP_758587.1	NP_012118.1 NP_013020.1	XP_661620.1	XP_961912.2	Dikarya
ctg03_AA_00246		XP_003026294.1	XP_001829462.1	XP_001873591.1	Pha_23104 Pha_63253							Agaricomycetes
ctg03_AA_00247												F.velutipes
ctg03_AA_00248		XP_003029924.1		XP_001881079.1								Agaricales
ctg03_AA_00249			XP_001829583.1	XP_001888054.1								Agaricales
ctg03_AA_00250		XP_003026333.1	XP_001829498.2		Pha_26265			XP_758528.1				Basidiomycota
ctg03_AA_00251		XP_003025889.1	XP_001831149.1	XP_001881910.1 XP_001881912.1	Pha_70726		XP_572500.1	XP_760564.1	NP_013533.1	XP_663945.1	XP_956587.1	Dikarya
ctg03_AA_00252		XP_003027605.1	XP_002910071.1	XP_001885914.1								Agaricales
ctg03_AA_00253	ctg11-1_AA_00697ctg13_AA_00858											F.velutipes
ctg03_AA_00254				XP_001884720.1								Agaricales
ctg03_AA_00255		XP_003035473.1 XP_003026412.1		XP_001889203.1 XP_001888498.1 XP_001888501.1	Pha_23103	XP_002477060.1 XP_002469592.1	XP_572853.1 XP_571672.1		NP_012896.1	XP_664537.1	XP_965588.1	Dikarya
ctg03_AA_00256		XP_003026295.1	XP_001829633.1	XP_001882694.1 XP_001888444.1			XP_570264.1	XP_758854.1				Basidiomycota
ctg03_AA_00257		XP_003032977.1	XP_001829573.1	XP_001888259.1	Pha_71378		XP_568193.1	XP_760144.1	NP_012995.1	XP_662378.1	XP_965742.2	Dikarya
ctg03_AA_00258	ctg11-1_AA_00752	XP_003038016.1			Pha_96082		XP_572241.1	XP_757803.1		XP_682241.1 XP_661752.1	XP_961039.2	Dikarya
ctg03_AA_00259		XP_003031271.1 XP_003032799.1	XP_001831311.2		Pha_96034		XP_570003.1 XP_567184.1	XP_756256.1	NP_116602.1 NP_013641.1	XP_657638.1	XP_961125.2 XP_957477.1	Dikarya
ctg03_AA_00260		XP_003039015.1	XP_001829344.2	XP_001879906.1 XP_001889978.1 XP_001875171.1	Pha_64977			XP_759961.1		XP_658750.1	XP_961014.1	Dikarya
ctg03_AA_00261		XP_003031293.1					XP_567186.1	XP_760953.1		XP_658481.1	XP_963499.2	Dikarya
ctg03_AA_00262		XP_003037030.1	XP_002912190.1	XP_001873498.1	Pha_94693		XP_571969.1	XP_759868.1	NP_010811.1	XP_663278.1	XP_964928.2	Dikarya
ctg03_AA_00263		XP_003037036.1	XP_001829377.1	XP_001874123.1	Pha_22286	XP_002469597.1	XP_571210.1	XP_759066.1	NP_014412.1	XP_660571.1	XP_965143.1	Dikarya
ctg03_AA_00264		XP_003030850.1	XP_001829485.2	XP_001874189.1	Pha_65084	XP_002471642.1				XP_657646.1	XP_962937.2	Dikarya
ctg03_AA_00265		XP_003038662.1	XP_001829418.2	XP_001874220.1	Pha_22827	XP_002475547.1		XP_759671.1		XP_680910.1	XP_960480.1	Dikarya
ctg03_AA_00266		XP_003038335.1	XP_001829437.1	XP_001874138.1	Pha_63665 Pha_26382		XP_569379.1	XP_759503.1	NP_011770.1NP_012044.1NP_015038.1NP_015042.1NP_014056.1	XP_663350.1	XP_957959.1	Dikarya
ctg03_AA_00267		XP_003036977.1	XP_001829484.2	XP_001873558.1	Pha_65082	XP_002475677.1	XP_570252.1	XP_759973.1		XP_663927.1	XP_955770.2	Dikarya
ctg03_AA_00268		XP_003036984.1	XP_001829483.2	XP_001874195.1	Pha_65083	XP_002471083.1	XP_570461.1	XP_756948.1	NP_012056.1	XP_662243.1	XP_965761.1	Dikarya
ctg03_AA_00269		XP_003035499.1	XP_001841021.2	XP_001878389.1	Pha_94550		XP_569790.1	XP_758221.1		XP_662540.1	XP_001728078.1	Dikarya
ctg03_AA_00270												F.velutipes
ctg03_AA_00271		XP_003036988.1	XP_001829455.1	XP_001874201.1	Pha_65066		XP_568693.1	XP_756944.1	NP_012639.1	XP_659876.1	XP_957300.2	Dikarya
ctg03_AA_00272		XP_003036104.1	XP_001833082.2	XP_001874953.1	Pha_27146	XP_002469891.1		XP_757941.1		XP_660098.1	XP_959185.1 XP_957663.2	Dikarya
ctg03_AA_00273		XP_003026291.1	XP_001829503.2	XP_001874181.1		XP_002469600.1		XP_759601.1		XP_682081.1	XP_957636.1	Dikarya
ctg03_AA_00274		XP_003038645.1	XP_001829420.2 XP_001829430.1	XP_001873546.1	Pha_69128	XP_002471309.1				XP_660322.1	XP_959266.1 XP_959267.1	Dikarya
ctg03_AA_00275	ctg05_AA_01799ctg13_AA_00419											F.velutipes
ctg03_AA_00276	ctg05_AA_00322ctg05_AA_01798ctg06_AA_00585ctg13_AA_00420ctg13_AA_00770ctg26_AA_00022ctg26_AA_00514											F.velutipes
ctg03_AA_00277	ctg05_AA_00321ctg05_AA_01796ctg13_AA_00421											F.velutipes
ctg03_AA_00278		XP_003035836.1 XP_003035838.1 XP_003035837.1	XP_001831162.1	XP_001881783.1		XP_002476015.1						Agaricomycetes
ctg03_AA_00279		XP_003035836.1 XP_003035838.1 XP_003035837.1	XP_001831162.1	XP_001881783.1		XP_002476015.1						Agaricomycetes
ctg03_AA_00280		XP_003038395.1	XP_002912209.1	XP_001873501.1	Pha_64909		XP_569564.1	XP_760529.1		XP_662294.1	XP_965731.1	Dikarya
ctg03_AA_00281		XP_003038344.1	XP_001840435.1	XP_001879848.1	Pha_94210	XP_002471080.1	XP_569562.1	XP_760295.1	NP_010624.1			Dikarya
ctg03_AA_00282		XP_003030888.1 XP_003032162.1		Lacc XP_001883306.1 Lacc XP_001885236.1	Pha_66199Pha_99062		XP_569650.1 XP_568244.1	XP_761975.1	NP_116616.1	XP_664442.1 XP_658786.1	XP_957669.2	Dikarya
ctg03_AA_00283		XP_003033484.1 XP_003027824.1 XP_003028747.1 XP_003027552.1	XP_001835443.2 XP_001839495.1	Lacc XP_001888253.1 Lacc XP_001875608.1	Pha_77495Pha_94224	XP_002477085.1XP_002470008.1XP_002470011.1	XP_571164.1	XP_758318.1	NP_014692.1	XP_662516.1 XP_660255.1	XP_960842.1	Dikarya
ctg03_AA_00284		XP_003037033.1 XP_003037032.1			Pha_72610					XP_682026.1 XP_660162.1	XP_959876.1	Dikarya
ctg03_AA_00285												F.velutipes
ctg03_AA_00286			XP_001832549.1	XP_001886282.1	Pha_73116 Pha_73087	XP_002470351.1 XP_002475902.1				XP_660184.1		Dikarya
ctg03_AA_00287												F.velutipes
ctg03_AA_00288		XP_003038352.1	XP_001829403.1	XP_001874145.1	Pha_66946	XP_002469544.1	XP_572336.1	XP_759385.1			XP_965361.1	Dikarya
ctg03_AA_00289		XP_003038353.1	XP_001829405.1	XP_001874140.1	Pha_63705	XP_002472528.1 XP_002468845.1						Agaricomycetes
ctg03_AA_00290				XP_001889082.1 XP_001878581.1								Agaricales
ctg03_AA_00291			XP_001829406.1									Agaricales
ctg03_AA_00292		XP_003036995.1	XP_001829408.2	XP_001874139.1	Pha_95434		XP_568164.1	XP_756966.1	NP_011273.1	XP_659768.1	XP_961938.1	Dikarya
ctg03_AA_00293		XP_003037029.1	XP_001829247.2		Pha_65845		XP_570973.1	XP_759360.1	NP_009492.1	XP_659158.1	XP_964026.1	Dikarya
ctg03_AA_00294		XP_003038400.1	XP_001829444.2	XP_001873527.1	Pha_24243	XP_002469587.1						Agaricomycetes
ctg03_AA_00295		XP_003031267.1	XP_001837706.2 XP_001831461.2	XP_001885883.1				XP_756175.1		XP_662943.1	XP_962303.1	Dikarya
ctg03_AA_00296	ctg03_AA_00300ctg26_AA_00184											F.velutipes
ctg03_AA_00297		XP_003029163.1	XP_001830854.1	XP_001877550.1	Pha_23508	XP_002476543.1	XP_568706.1		NP_011792.1	XP_680835.1	XP_965348.1	Dikarya
ctg03_AA_00298	ctg03_AA_00299	XP_003033406.1	XP_001830771.2	XP_001877475.1	Pha_65258	XP_002469633.1 XP_002472720.1						Agaricomycetes
ctg03_AA_00299	ctg03_AA_00298		XP_001835647.1	XP_001883147.1								Agaricales
ctg03_AA_00300	ctg26_AA_00184ctg03_AA_00296		XP_001835647.1	XP_001883147.1								Agaricales
ctg03_AA_00301	ctg03_AA_00302											F.velutipes
ctg03_AA_00302	ctg03_AA_00305ctg03_AA_00301	XP_003038765.1 XP_003032591.1	XP_001830362.1 XP_001840193.1	XP_001885243.1	Pha_72829 Pha_71949	XP_002473888.1	XP_566530.1	XP_758052.1	NP_012633.1	XP_680760.1	XP_962406.1	Dikarya
ctg03_AA_00303		XP_003038358.1	XP_001829442.1	XP_001874146.1	Pha_67154		XP_572324.1	XP_762133.1	NP_011769.1	XP_663476.1	XP_962066.1	Dikarya
ctg03_AA_00304		XP_003037039.1	XP_002912090.1 XP_001829443.1	XP_001873528.1	Pha_77509		XP_569293.1	XP_756212.1	NP_012213.1 NP_010978.1	XP_682349.1	XP_963925.1	Dikarya
ctg03_AA_00305	ctg03_AA_00302											F.velutipes
ctg03_AA_00306		XP_003037418.1	XP_001834096.1		Pha_94290 Pha_100327	XP_002469715.1 XP_002470068.1 XP_002476910.1		XP_757858.1		XP_682280.1 XP_681598.1	XP_960108.2	Dikarya
ctg03_AA_00307	ctg11-2_AA_01514ctg33_AA_00770											F.velutipes
ctg03_AA_00308		XP_003038391.1	XP_001829246.2	XP_001874122.1	Pha_71504	XP_002474311.1	XP_572977.1 XP_572976.1	XP_760294.1	NP_009660.1	XP_658164.1	XP_961819.2	Dikarya
ctg03_AA_00309		XP_003038392.1	XP_001829416.1	XP_001873534.1	Pha_63699	XP_002469541.1						Agaricomycetes
ctg03_AA_00310												F.velutipes
ctg03_AA_00311		XP_003037027.1	XP_001829368.2	XP_001873473.1	Pha_64990	XP_002470340.1	XP_568793.1	XP_759215.1	NP_009602.1	XP_657762.1	XP_957520.1	Dikarya
ctg03_AA_00312		XP_003036874.1	XP_002910444.1 XP_001834502.1 XP_001841558.2	Lacc XP_001875308.1 Lacc XP_001885643.1				XP_761921.1		XP_664030.1	XP_957425.1 XP_960176.1	Dikarya
ctg03_AA_00313		XP_003029243.1	XP_001832570.2	XP_001879931.1 XP_001879570.1								Agaricales
ctg03_AA_00314		XP_003038380.1	XP_001829369.1	XP_001873474.1	Pha_64914	XP_002474484.1	XP_566583.1	XP_759058.1	NP_014767.1		XP_959925.1	Dikarya
ctg03_AA_00315												F.velutipes
ctg03_AA_00316		XP_003031839.1	XP_001829575.1	XP_001884847.1		XP_002470563.1						Agaricomycetes
ctg03_AA_00317		XP_003036999.1	XP_001829388.2	XP_001873508.1			XP_571943.1	XP_759222.1			XP_958915.1	Dikarya
ctg03_AA_00318				XP_001874129.1								Agaricales
ctg03_AA_00319												F.velutipes
ctg03_AA_00320		XP_003038356.1	XP_001829441.1	XP_001873531.1	Pha_67153	XP_002469543.1	XP_572022.1 XP_569613.1	XP_758897.1	NP_010573.1 NP_011912.1	XP_658740.1	XP_959612.1 XP_962382.1	Dikarya
ctg03_AA_00321			XP_002911631.1						NP_014965.1	XP_682156.1		Dikarya
ctg03_AA_00322		XP_003038371.1	XP_001829361.2	XP_001874107.1	Pha_69412	XP_002474476.1						Agaricomycetes
ctg03_AA_00323		XP_003028903.1	XP_002910259.1	XP_001879869.1	Pha_66451	XP_002469871.1	XP_567083.1	XP_760101.1			XP_001728450.1	Dikarya
ctg03_AA_00324		XP_003038368.1	XP_001829362.2	XP_001873482.1	Pha_95038	XP_002471075.1	XP_570779.1	XP_756523.1	NP_009486.3	XP_661191.1	XP_965281.2	Dikarya
ctg03_AA_00325		XP_003038369.1	XP_001829363.1	XP_001873481.1				XP_757131.1		XP_661546.1		Dikarya
ctg03_AA_00326		XP_003038370.1	XP_001829334.1	XP_001873480.1	Pha_71543	XP_002472047.1 XP_002469546.1	XP_569648.1	XP_762150.1	NP_012551.2	XP_663749.1	XP_963036.2	Dikarya
ctg03_AA_00327		XP_003037006.1	XP_001829393.1	XP_001873514.1	Pha_94680	XP_002477518.1	XP_570735.1	XP_759326.1	NP_012626.1	XP_660037.1	XP_962781.1	Dikarya
ctg03_AA_00328		XP_003037000.1	XP_001829389.2		Pha_76907	XP_002477141.1	XP_571944.1	XP_760907.1	NP_010858.1	XP_681456.1	XP_960994.2	Dikarya
ctg03_AA_00329		XP_003038360.1	XP_001829392.1	XP_001873510.1	Pha_64947	XP_002469552.1	XP_568945.1					Basidiomycota
ctg03_AA_00330		XP_003036689.1	XP_001835238.1					XP_757723.1			XP_960123.1	Dikarya
ctg03_AA_00331		XP_003038397.1	XP_001829386.2		Pha_30168 Pha_76902	XP_002473900.1	XP_572430.1	XP_760297.1	NP_010425.1	XP_659698.1	XP_959163.1	Dikarya
ctg03_AA_00332		XP_003037040.1	XP_001829385.1	XP_001873507.1	Pha_76900				NP_013351.1	XP_657735.1	XP_955761.1	Dikarya
ctg03_AA_00333	ctg03_AA_00334	XP_003032175.1 XP_003034234.1 XP_003037074.1 XP_003037046.1	XP_001832125.2XP_001836521.2XP_001829383.2XP_002911065.1	XP_001885787.1XP_001889222.1XP_001885789.1XP_001889267.1XP_001873491.1	Pha_98506Pha_94063Pha_30166	XP_002473901.1	XP_568995.1XP_570345.1XP_568169.1XP_567026.1XP_568616.1XP_568604.1	XP_760203.1XP_758943.1XP_761789.1XP_761400.1	NP_010694.1NP_014796.1NP_014973.1NP_010294.1NP_015267.1NP_014468.1NP_012252.1NP_014654.1	XP_682613.1XP_682197.1XP_682161.1XP_681758.1XP_681613.1XP_680850.1XP_664185.1XP_661556.1XP_660933.1XP_660851.1XP_658778.1XP_658375.1	XP_960553.1XP_958529.1XP_958070.1XP_965187.1	Dikarya
ctg03_AA_00334	ctg03_AA_00333											F.velutipes
ctg03_AA_00335		XP_003037016.1	XP_001829398.2	XP_001873516.1	Pha_71495	XP_002474483.1 XP_002471047.1	XP_569949.1	XP_758504.1	NP_013214.1	XP_658621.1	XP_962163.2	Dikarya
ctg03_AA_00336		XP_003038378.1 XP_003038372.1 XP_003038376.1	XP_001829397.2	XP_001874137.1	Pha_26807		XP_572314.1	XP_759922.1	NP_012772.1	XP_658036.1	XP_964971.1	Dikarya
ctg03_AA_00337		XP_003037003.1 XP_003036344.1	XP_001829394.1	XP_001874135.1	Pha_65005	XP_002473922.1	XP_567818.1					Basidiomycota
ctg03_AA_00338		XP_003028572.1 XP_003032161.1	XP_001836598.2	Lacc XP_001885242.1 Lacc XP_001880963.1	Pha_65638	XP_002470927.1	XP_569480.1	XP_757869.1		XP_662333.1	XP_965003.1 XP_960106.1	Dikarya
ctg03_AA_00339	ctg13_AA_00883							XP_758107.1		XP_681854.1 XP_664535.1		Dikarya
ctg03_AA_00340												F.velutipes
ctg03_AA_00341		XP_003038384.1 XP_003032351.1	XP_001829374.2	XP_001873478.1 XP_001873479.1	Pha_24116Pha_95515		XP_572067.1 XP_566907.1	XP_762204.1 XP_760710.1	NP_009575.1	XP_664617.1 XP_662331.1	XP_963126.1 XP_957519.1	Dikarya
ctg03_AA_00342			XP_001836976.2	XP_001884387.1								Agaricales
ctg03_AA_00343		XP_003038364.1	XP_001829350.2	XP_001874114.1	Pha_96348		XP_566682.1	XP_762436.1	NP_013961.1	XP_662792.1	XP_959725.1 XP_963802.1	Dikarya
ctg03_AA_00344		XP_003028666.1	XP_001838836.1		Pha_74069		XP_570884.1		NP_009532.1	XP_661638.1	XP_964683.2	Dikarya
ctg03_AA_00345		XP_003038414.1	XP_001829314.1	XP_001874078.1								Agaricales
ctg03_AA_00346		XP_003038407.1	XP_001829353.1	XP_001873487.1			XP_572267.1					Basidiomycota
ctg03_AA_00347		XP_003037062.1	XP_001829336.1	XP_001873463.1	Pha_71590							Agaricomycetes
ctg03_AA_00348												F.velutipes
ctg03_AA_00349		XP_003038425.1	XP_002912202.1		Pha_30162		XP_572682.1	XP_756540.1	NP_013502.1	XP_663611.1	XP_965488.1	Dikarya
ctg03_AA_00350		XP_003038419.1	XP_001829320.2	XP_001873454.1	Pha_63594						XP_960102.1	Dikarya
ctg03_AA_00351		XP_003038420.1	XP_001829318.2	XP_001873453.1	Pha_97334	XP_002474587.1 XP_002473928.1	XP_570727.1	XP_759480.1	NP_014134.1	XP_658329.1	XP_962661.1	Dikarya
ctg03_AA_00352		XP_003037055.1	XP_001829316.2	XP_001873452.1	Pha_71578		XP_567373.1	XP_758632.1	NP_012939.1	XP_661446.1	XP_964811.1	Dikarya
ctg03_AA_00353												F.velutipes
ctg03_AA_00354		XP_003037048.1	XP_001829382.1		Pha_76896			XP_759030.1		XP_661277.1	XP_965357.1	Dikarya
ctg03_AA_00355		XP_003038406.1 XP_003038711.1	XP_001829337.1 XP_002912211.1	XP_001873462.1 XP_001887309.1 XP_001874125.1	Pha_76773Pha_66861Pha_99560	XP_002475161.1	XP_570549.1 XP_570208.1	XP_759015.1	NP_010673.1 NP_014776.1 NP_012748.1	XP_663934.1 XP_659012.1	XP_962286.2 XP_965703.2	Dikarya
ctg03_AA_00356		XP_003037049.1	XP_002912210.1	XP_001874124.1	Pha_99559		XP_570776.1		NP_009343.1	XP_661196.1	XP_964700.2	Dikarya
ctg03_AA_00357		XP_003029673.1	XP_001830733.2	XP_001877848.1				XP_757340.1		XP_661609.1	XP_961596.1	Dikarya
ctg03_AA_00358		XP_003038427.1	XP_002912200.1	XP_001874077.1	Pha_26859	XP_002473908.1 XP_002477457.1	XP_570239.1	XP_756904.1	NP_015416.1	XP_660361.1	XP_964231.1	Dikarya
ctg03_AA_00359												F.velutipes
ctg03_AA_00360		XP_003033673.1	XP_001840856.1	XP_001879832.1	Pha_24274		XP_568690.1		NP_012592.1	XP_658326.1	XP_962659.1	Dikarya
ctg03_AA_00361		XP_003038415.1	XP_002912198.1	XP_001873449.1	Pha_97347	XP_002473930.1 XP_002474590.1	XP_569608.1	XP_756958.1	NP_010401.1	XP_681494.1	XP_958831.1	Dikarya
ctg03_AA_00362		XP_003038416.1	XP_001829306.1	XP_001874073.1	Pha_71612			XP_756932.1	NP_012767.1	XP_662217.1	XP_965739.1	Dikarya
ctg03_AA_00363			XP_002912199.1									Agaricales
ctg03_AA_00364												F.velutipes
ctg03_AA_00365		XP_003037057.1	XP_001829309.2		Pha_97344	XP_002473929.1	XP_570624.1	XP_756850.1	NP_014855.1	XP_657685.1	XP_956704.2	Dikarya
ctg03_AA_00366		XP_003037058.1	XP_001829310.1		Pha_71602							Agaricomycetes
ctg03_AA_00367		XP_003037505.1	XP_001829359.1	XP_001873483.1	Pha_76860	XP_002474299.1				XP_663899.1		Dikarya
ctg03_AA_00368		XP_003038845.1		XP_001874108.1								Agaricales
ctg03_AA_00369		XP_003034639.1	XP_001835907.2	XP_001875852.1	Pha_69673	XP_002474491.1	XP_569875.1	XP_762557.1				Basidiomycota
ctg03_AA_00370		XP_003038406.1 XP_003038711.1	XP_001829337.1 XP_002912211.1	XP_001873462.1 XP_001887309.1 XP_001874125.1	Pha_76773Pha_66861Pha_99560	XP_002475161.1	XP_570549.1 XP_570208.1	XP_759015.1	NP_010673.1 NP_014776.1 NP_012748.1	XP_663934.1 XP_659012.1	XP_962286.2 XP_965703.2	Dikarya
ctg03_AA_00371		XP_003034466.1 XP_003038428.1	XP_001829283.2 XP_001835698.1	Lacc XP_001875907.1 Lacc XP_001874061.1	Pha_76892Pha_63761		XP_572498.1	XP_758039.1 XP_760432.1	NP_015331.1 NP_010987.1	XP_682024.1 XP_663238.1	XP_965075.1 XP_960854.1	Dikarya
ctg03_AA_00372												F.velutipes
ctg03_AA_00373		XP_003037064.1	XP_001829285.2									Agaricales
ctg03_AA_00374		XP_003037068.1	XP_001829287.1	XP_001874062.1	Pha_99571		XP_572029.1					Basidiomycota
ctg03_AA_00375		XP_003037067.1	XP_001829288.1	XP_001874063.1	Pha_76914		XP_569761.1	XP_762409.1	NP_010820.1	XP_868828.1	XP_964560.1	Dikarya
ctg03_AA_00376		XP_003037065.1	XP_001829289.1	XP_001874064.1	Pha_76912	XP_002477140.1	XP_570632.1	XP_756915.1	NP_014112.1	XP_662151.1	XP_964857.1	Dikarya
ctg03_AA_00377		XP_003038847.1	XP_002912206.1	XP_001873493.1	Pha_76857		XP_572904.1	XP_756715.1	NP_014004.1	XP_660506.1	XP_958446.2	Dikarya
ctg03_AA_00378	ctg03_AA_00379											F.velutipes
ctg03_AA_00379	ctg03_AA_00378	XP_003037499.1	XP_001832911.2	XP_001886025.1	Pha_24595				NP_010572.1			Dikarya
ctg03_AA_00380		XP_003035678.1	XP_002911811.1	XP_001886121.1	Pha_67717							Agaricomycetes
ctg03_AA_00381		XP_003034843.1	XP_001832907.1	XP_001886119.1	Pha_67712 Pha_67715	XP_002473477.1	XP_571885.1			XP_659565.1	XP_958131.1	Dikarya
ctg03_AA_00382			XP_001835927.2					XP_762630.1		XP_658597.1	XP_960768.1	Dikarya
ctg03_AA_00383		XP_003032531.1 XP_003035444.1			Pha_74598	XP_002472377.1				XP_682647.1 XP_682616.1	XP_958932.2 XP_957926.1	Dikarya
ctg03_AA_00384		XP_003030117.1	XP_001834595.1	XP_001888520.1	Pha_73542			XP_761661.1				Basidiomycota
ctg03_AA_00385	ctg13_AA_00493	XP_003037854.1 XP_003037070.1 XP_003030513.1 XP_003038077.1	XP_001840866.2XP_001830063.1XP_001829291.2XP_001837136.2XP_001834729.1	XP_001887550.1XP_001877389.1XP_001876655.1XP_001873442.1	Pha_95012Pha_29043Pha_30174Pha_68717	XP_002473374.1	XP_569357.1XP_571995.1XP_570882.1XP_568689.1	XP_760437.1XP_756621.1	NP_014207.2NP_009594.1	XP_662170.1XP_661971.1XP_660127.1	XP_961242.1XP_962003.2XP_961338.2	Dikarya
ctg03_AA_00386		XP_003037069.1 XP_003029927.1	XP_001829290.1	XP_001874066.1	Pha_76911	XP_002472264.1	XP_570121.1	XP_756731.1	NP_015120.1	XP_662167.1	XP_965825.2	Dikarya
ctg03_AA_00387			XP_001828948.1	XP_001873907.1		XP_002471905.1						Agaricomycetes
ctg03_AA_00388												F.velutipes
ctg03_AA_00389												F.velutipes
ctg03_AA_00390		XP_003030332.1	XP_001830290.1	XP_001881468.1		XP_002470168.1						Agaricomycetes
ctg03_AA_00391		XP_003036617.1	XP_001839085.2	XP_001876408.1	Pha_68752	XP_002471940.1 XP_002475507.1	XP_571681.1	XP_762246.1				Basidiomycota
ctg03_AA_00392		XP_003037071.1	XP_002912195.1	XP_001874069.1								Agaricales
ctg03_AA_00393		XP_003036213.1	XP_001830114.2	XP_001881648.1 XP_001890582.1	Pha_65577		XP_572703.1	XP_762098.1	NP_010346.1	XP_658165.1	XP_961886.1	Dikarya
ctg03_AA_00394		XP_003038858.1	XP_001829299.1									Agaricales
ctg03_AA_00395		XP_003037511.1	XP_001829294.2	XP_001873443.1	Pha_71562							Agaricomycetes
ctg03_AA_00396		XP_003037512.1	XP_001829295.2	XP_001873444.1				XP_756885.1				Basidiomycota
ctg03_AA_00397		XP_003038409.1	XP_001829301.1	XP_001874071.1	Pha_71620	XP_002473911.1	XP_571938.1	XP_756836.1		XP_659866.1	XP_960723.1	Dikarya
ctg03_AA_00398		XP_003037052.1	XP_001829302.2		Pha_26875		XP_572000.1	XP_758766.1	NP_009971.1	XP_659098.1	XP_964008.1	Dikarya
ctg03_AA_00399		XP_003037053.1	XP_002912197.1	XP_001873448.1	Pha_26872	XP_002473931.1 XP_002475103.1	XP_570567.1	XP_756713.1	NP_116674.2	XP_662815.1	XP_964610.1	Dikarya
ctg03_AA_00400		XP_003038410.1	XP_001829304.2	XP_001874072.1	Pha_97348		XP_570240.1	XP_756964.1		XP_662387.1	XP_965733.1	Dikarya
ctg03_AA_00401		XP_003026027.1	XP_001835145.1	XP_001879541.1	Pha_28263		XP_571026.1	XP_759446.1	NP_010335.1	XP_664504.1	XP_959063.1	Dikarya
ctg03_AA_00402												F.velutipes
ctg03_AA_00403		XP_003038851.1	XP_001829349.2	XP_001874115.1	Pha_76862		XP_566693.1	XP_756945.1	NP_013132.1	XP_657648.1	XP_958511.1	Dikarya
ctg03_AA_00404		XP_003037506.1	XP_001829348.1	XP_001873495.1	Pha_76863		XP_566667.1	XP_756712.1	NP_012424.1	XP_663317.1	XP_958939.1	Dikarya
ctg03_AA_00405		XP_003037507.1	XP_001829347.1 XP_001839014.1	XP_001873496.1	Pha_63892Pha_75392Pha_76866Pha_30147		XP_569859.1 XP_569391.1	XP_757675.1	NP_012100.1	XP_661733.1XP_661711.1XP_660670.1XP_660563.1	XP_962843.2 XP_958986.2 XP_958530.1	Dikarya
ctg03_AA_00406		XP_003026489.1	XP_001832631.1	XP_001881233.1	Pha_67458	XP_002469805.1	XP_572758.1	XP_760152.1		XP_662811.1	XP_958037.1	Dikarya
ctg03_AA_00407			XP_002912204.1	XP_001873469.1	Pha_76870	XP_002474584.1						Agaricomycetes
ctg03_AA_00408		XP_003037509.1		XP_001873440.1	Pha_76875	XP_002477335.1 XP_002474571.1		XP_756723.1				Basidiomycota
ctg03_AA_00409												F.velutipes
ctg03_AA_00410		XP_003038856.1	XP_001829281.2		Pha_99553	XP_002477339.1	XP_570800.1	XP_758759.1	NP_013500.1	XP_660022.1	XP_958893.1	Dikarya
ctg03_AA_00411		XP_003037066.1	XP_001829282.1	XP_001874060.1	Pha_30157		XP_570135.1	XP_757377.1	NP_013652.1	XP_660085.1	XP_961904.2	Dikarya
ctg03_AA_00412		XP_003032653.1 XP_003038835.1		XP_001874086.1								Agaricales
ctg03_AA_00413		XP_003038713.1	XP_002912205.1	XP_001873464.1 XP_001873467.1	Pha_76768							Agaricomycetes
ctg03_AA_00414		XP_003038843.1	XP_001829341.2	XP_001874094.1	Pha_76829			XP_759303.1	NP_011043.1	XP_680967.1	XP_965198.1	Dikarya
ctg03_AA_00415		XP_003037375.1	XP_001829342.1	XP_001873461.1	Pha_30125		XP_570311.1	XP_758770.1	NP_013531.1	XP_662789.1	XP_001728335.1	Dikarya
ctg03_AA_00416		XP_003038836.1	XP_001829236.1	XP_001874091.1			XP_571056.1					Basidiomycota
ctg03_AA_00417			XP_001829340.1 XP_001829339.1	XP_001874095.1		XP_002470500.1						Agaricomycetes
ctg03_AA_00418		XP_003037379.1	XP_001829327.2	XP_001873455.1	Pha_76762			XP_760700.1		XP_662112.1	XP_958021.1	Dikarya
ctg03_AA_00419		XP_003038718.1	XP_001829328.1	XP_001874082.1	Pha_76761	XP_002477240.1 XP_002475179.1	XP_571469.1	XP_756482.1	NP_010475.1	XP_660122.1	XP_961243.2	Dikarya
ctg03_AA_00420		XP_003038717.1	XP_001829329.2	XP_001873456.1	Pha_76758 Pha_76760	XP_002475166.1 XP_002474319.1						Agaricomycetes
ctg03_AA_00421		XP_003037850.1 XP_003026678.1	XP_001833161.2XP_001838448.1XP_001830199.2XP_001835175.2	XP_001874084.1	Pha_71901		XP_568082.1 XP_570709.1 XP_572368.1	XP_756644.1 XP_759622.1	NP_010591.1 NP_009855.1	XP_663793.1 XP_661385.1 XP_660416.1	XP_962506.2 XP_959489.1	Dikarya
ctg03_AA_00422												F.velutipes
ctg03_AA_00423	ctg03_AA_00424	XP_003038714.1	XP_001829325.2		Pha_99505	XP_002474306.1	XP_566805.1	XP_756834.1		XP_662404.1	XP_964510.1	Dikarya
ctg03_AA_00424	ctg03_AA_00423	XP_003038714.1	XP_001829325.2		Pha_99505	XP_002474306.1	XP_566805.1	XP_756834.1		XP_662404.1	XP_964510.1	Dikarya
ctg03_AA_00425		XP_003038404.1	XP_001838350.2	XP_001886843.1	Pha_97373		XP_571153.1	XP_756317.1	NP_014353.1	XP_663416.1	XP_960660.1	Dikarya
ctg03_AA_00426		XP_003028543.1 XP_003037381.1	XP_001829269.2 XP_001840433.2	Lacc XP_001887363.1 Lacc XP_001874054.1	Pha_74058Pha_99529	XP_002476307.1 XP_002470484.1 XP_002470452.1	XP_569814.1	XP_758853.1	NP_014639.1	XP_659150.1	XP_965709.2	Dikarya
ctg03_AA_00427		XP_003037378.1	XP_001829267.2	XP_001874052.1	Pha_64937		XP_572262.1		NP_010220.1		XP_962300.1	Dikarya
ctg03_AA_00428												F.velutipes
ctg03_AA_00429		XP_003038837.1	XP_002912191.1		Pha_94683	XP_002469551.1	XP_569857.1 XP_566654.1	XP_758739.1		XP_663788.1 XP_658276.1	XP_001728088.1	Dikarya
ctg03_AA_00430		XP_003037501.1	XP_001829263.2	XP_001874050.1	Pha_64944	XP_002469550.1	XP_569322.1	XP_759228.1	NP_014378.1	XP_661798.1	XP_962918.1	Dikarya
ctg03_AA_00431		XP_003035573.1					XP_567138.1		NP_010849.1	XP_662982.1	XP_958609.1	Dikarya
ctg03_AA_00432		XP_003038841.1	XP_001829248.2	XP_001873437.1		XP_002473950.1	XP_568409.1	XP_760682.1		XP_658334.1	XP_955908.1	Dikarya
ctg03_AA_00433		XP_003037302.1		XP_001873436.1	Pha_64961		XP_569279.1		NP_013523.1	XP_659742.1	XP_961050.2	Dikarya
ctg03_AA_00434	ctg11-1_AA_00591ctg13_AA_00358ctg33_AA_00412ctg33_AA_00413	XP_003033520.1XP_003030873.1	XP_001835890.2XP_001829254.2XP_001828562.2XP_001840168.1XP_001836626.2	XP_001874047.1XP_001880971.1XP_001879391.1	Pha_29753Pha_64963Pha_67673Pha_76254Pha_94982	XP_002473972.1XP_002474826.1	XP_569522.1XP_570324.1XP_570944.1XP_571352.1	XP_761890.1XP_760083.1XP_760335.1XP_757245.1	NP_010929.1NP_014408.1NP_011395.1NP_013012.1	XP_663431.1XP_662325.1XP_661636.1XP_657737.1	XP_960795.1XP_962580.1XP_965113.1XP_956523.2	Dikarya
ctg03_AA_00435		XP_003037376.1	XP_001829256.2	XP_001874046.1	Pha_76799	XP_002475120.1 XP_002473914.1	XP_567202.1	XP_758994.1	NP_010935.1	XP_661531.1	XP_963735.1	Dikarya
ctg03_AA_00436		XP_003038710.1	XP_002912189.1	XP_001873433.1	Pha_26820		XP_571971.1	XP_762181.1	NP_009462.2	XP_662008.1	XP_960952.1	Dikarya
ctg03_AA_00437		XP_003038709.1	XP_001829257.1	XP_001873434.1	Pha_97317	XP_002473935.1 XP_002475095.1	XP_571422.1	XP_762296.1		XP_661489.1		Dikarya
ctg03_AA_00438					Pha_67276							Agaricomycetes
ctg03_AA_00439			XP_001830138.1	XP_001889829.1					NP_013746.1			Dikarya
ctg03_AA_00440		XP_003038660.1	XP_001829200.1	XP_001874023.1	Pha_97313							Agaricomycetes
ctg03_AA_00441		XP_003038661.1	XP_002912178.1	XP_001873408.1	Pha_71508	XP_002473918.1 XP_002475116.1			NP_014016.1	XP_680957.1		Dikarya
ctg03_AA_00442		XP_003036638.1	XP_001829201.1	XP_001891355.1	Pha_63667	XP_002472052.1	XP_569816.1	XP_761257.1	NP_013323.1	XP_662064.1	XP_961355.1	Dikarya
ctg03_AA_00443		XP_003037308.1	XP_001829202.2	XP_001874025.1	Pha_94202							Agaricomycetes
ctg03_AA_00444		XP_003037313.1	XP_001829203.2	XP_001874026.1	Pha_76732	XP_002469601.1		XP_758955.1		XP_680648.1		Dikarya
ctg03_AA_00445		XP_003038663.1	XP_001829204.1 XP_002912179.1		Pha_63670		XP_572494.1	XP_762229.1		XP_662383.1	XP_965223.2	Dikarya
ctg03_AA_00446		XP_003038663.1	XP_001829204.1 XP_002912179.1		Pha_63670		XP_572494.1	XP_762229.1		XP_662383.1	XP_965223.2	Dikarya
ctg03_AA_00447		XP_003038664.1	XP_002912181.1	XP_001873409.1	Pha_94204			XP_756222.1		XP_658551.1	XP_955789.1	Dikarya
ctg03_AA_00448			XP_001829209.1	XP_001874028.1	Pha_63679							Agaricomycetes
ctg03_AA_00449		XP_003037306.1	XP_001829210.2	XP_001874029.1	Pha_63680	XP_002475104.1	XP_569565.1	XP_761988.1	NP_015346.1	XP_682054.1	XP_961607.1	Dikarya
ctg03_AA_00450		XP_003037303.1	XP_001829212.1	XP_001873410.1	Pha_63682		XP_571085.1	XP_760632.1	NP_013989.2	XP_661652.1	XP_961922.1	Dikarya
ctg03_AA_00451		XP_003031988.1	XP_001836207.2	XP_001880857.1	Pha_98269 Pha_28232		XP_568109.1	XP_757607.1				Basidiomycota
ctg03_AA_00452		XP_003033683.1	XP_001836000.2		Pha_99940	XP_002472861.1 XP_002473813.1	XP_567465.1	XP_761651.1	NP_014593.1		XP_963003.1	Dikarya
ctg03_AA_00453			XP_002910708.1	XP_001876164.1	Pha_77812						XP_965647.2	Dikarya
ctg03_AA_00454		XP_003036949.1	XP_001835894.2	XP_001886114.1	Pha_67215		XP_567135.1	XP_756665.1	NP_010641.1	XP_661238.1	XP_957488.1	Dikarya
ctg03_AA_00455		XP_003038643.1	XP_001829214.2	XP_001874033.1	Pha_65047	XP_002469586.1	XP_570778.1	XP_759413.1	NP_015357.1			Dikarya
ctg03_AA_00456	ctg29_AA_00058ctg29_AA_00059			XP_001886389.1								Agaricales
ctg03_AA_00457	ctg29_AA_00060		XP_001830943.1	XP_001889191.1 XP_001873521.1	Pha_70328							Agaricomycetes
ctg03_AA_00458		XP_003037207.1	XP_001831347.2		Pha_75009Pha_75023		XP_571336.1	XP_759363.1	NP_012719.2 NP_012600.1	XP_663586.1	XP_960570.1	Dikarya
ctg03_AA_00459		XP_003037992.1	XP_002911832.1 XP_001833077.2					XP_760916.1				Basidiomycota
ctg03_AA_00460		XP_003035274.1	XP_002911840.1	XP_001874935.1		XP_002474505.1						Agaricomycetes
ctg03_AA_00461	ctg06_AA_00452ctg06_AA_00462ctg06_AA_00470		XP_001834657.2 XP_001835375.2	XP_001882939.1								Agaricales
ctg03_AA_00462												F.velutipes
ctg03_AA_00463												F.velutipes
ctg03_AA_00464	ctg03_AA_00472											F.velutipes
ctg03_AA_00465		XP_003038644.1	XP_001829215.2	XP_001874034.1								Agaricales
ctg03_AA_00466		XP_003038668.1	XP_001829216.1 XP_001838054.2	XP_001873416.1	Pha_63696		XP_570878.1	XP_758494.1	NP_013740.1			Dikarya
ctg03_AA_00467		XP_003037324.1	XP_001829226.1 XP_001829227.1	XP_001874040.1 XP_001883365.1 XP_001886234.1	Pha_65022 Pha_63254	XP_002475089.1 XP_002476312.1 XP_002470826.1	XP_570869.1	XP_756382.1	NP_013403.1	XP_661656.1		Dikarya
ctg03_AA_00468		XP_003037309.1	XP_001829224.2	XP_001874039.1	Pha_65010		XP_569481.1	XP_759284.1	NP_013603.1	XP_658981.1	XP_957576.2	Dikarya
ctg03_AA_00469	ctg11-2_AA_01410	XP_003027438.1 XP_003038669.1 XP_003033326.1 XP_003032740.1	XP_001832350.1XP_001832303.2XP_001832312.2XP_002912185.1XP_001834503.2	XP_001873417.1 XP_001881010.1 XP_001886210.1	Pha_99714Pha_69281Pha_78623		XP_567118.1XP_571828.1XP_570996.1XP_572761.1XP_570712.1	XP_756597.1XP_759195.1XP_760821.1	NP_013052.1NP_011828.1	XP_682226.1XP_680945.1XP_664383.1XP_657829.1	XP_965261.1XP_960635.1XP_962130.2	Dikarya
ctg03_AA_00470		XP_003037319.1	XP_001829217.2	XP_001874035.1	Pha_65037		XP_571203.1	XP_760195.1			XP_961927.1	Dikarya
ctg03_AA_00471		XP_003038651.1	XP_001829225.2	XP_001873422.1	Pha_65012		XP_569945.1	XP_759867.1	NP_012802.1	XP_657670.1	XP_962817.1	Dikarya
ctg03_AA_00472	ctg03_AA_00464											F.velutipes
ctg03_AA_00473		XP_003037314.1	XP_001829223.2	XP_001873421.1	Pha_65013	XP_002469538.1	XP_569555.1	XP_759915.1	NP_014337.1	XP_681335.1	XP_959682.1	Dikarya
ctg03_AA_00474		XP_003030753.1	XP_001829862.1	XP_001881623.1	Pha_74846		XP_572521.1		NP_013722.1	XP_868909.1 XP_664180.1	XP_956660.1	Dikarya
ctg03_AA_00475	ctg11-1_AA_00709ctg29_AA_00652ctg33_AA_00587ctg01_AA_00383											F.velutipes
ctg03_AA_00476												F.velutipes
ctg03_AA_00477												F.velutipes
ctg03_AA_00478		XP_003038650.1		XP_001874038.1	Pha_65014	XP_002475087.1	XP_572302.1	XP_762302.1	NP_014678.1	XP_657739.1	XP_963662.2	Dikarya
ctg03_AA_00479		XP_003037428.1	XP_001829229.1	XP_001874041.1	Pha_65023	XP_002475088.1						Agaricomycetes
ctg03_AA_00480		XP_003037429.1	XP_001829228.1	XP_001873423.1	Pha_65025	XP_002469535.1	XP_571302.1	XP_759044.1	NP_010180.1	XP_682363.1	XP_964103.1	Dikarya
ctg03_AA_00481	ctg13_AA_00666ctg13_AA_00667ctg29_AA_00169		XP_002910883.1	XP_001883163.1		XP_002472936.1						Agaricomycetes
ctg03_AA_00482			XP_001840861.1							XP_681929.1	XP_962558.2 XP_963610.1	Dikarya
ctg03_AA_00483		XP_003038666.1	XP_002912186.1	XP_001873419.1	Pha_94719	XP_002469584.1	XP_569876.1	XP_757854.1	NP_009815.1	XP_661835.1	XP_963907.1	Dikarya
ctg03_AA_00484		XP_003027457.1	XP_001837531.2	XP_001888262.1	Pha_94259Pha_63802	XP_002469800.1 XP_002476476.1		XP_758304.1		XP_658933.1	XP_959075.1	Dikarya
ctg03_AA_00485		XP_003037406.1	XP_001829239.2	XP_001873429.1	Pha_65033		XP_568960.1 XP_568959.1	XP_757783.1	NP_014640.1	XP_659169.1	XP_963855.1	Dikarya
ctg03_AA_00486		XP_003038751.1	XP_002912188.1	XP_001873427.1								Agaricales
ctg03_AA_00487		XP_003027514.1	XP_001832459.1	XP_001881083.1		XP_002476352.1		XP_758910.1			XP_958641.1	Dikarya
ctg03_AA_00488		XP_003038755.1	XP_001829235.1	XP_001873426.1	Pha_94710	XP_002475091.1		XP_759418.1	NP_014275.1	XP_658332.1		Dikarya
ctg03_AA_00489		XP_003037420.1	XP_001829234.1	XP_001874043.1	Pha_65008	XP_002475109.1	XP_569654.1	XP_761263.1				Basidiomycota
ctg03_AA_00490		XP_003038764.1	XP_001829230.2	XP_001873424.1	Pha_94724	XP_002475105.1 XP_002469537.1	XP_572015.1	XP_759347.1				Basidiomycota
ctg03_AA_00491		XP_003034028.1				XP_002473278.1						Agaricomycetes
ctg03_AA_00492		XP_003034286.1	XP_001835632.2	XP_001876155.1			XP_569616.1	XP_760520.1	NP_011360.1	XP_663364.1	XP_959641.1	Dikarya
ctg03_AA_00493		XP_003038756.1	XP_001829233.2	XP_001873425.1	Pha_65029		XP_570262.1		NP_015238.1 NP_009742.1	XP_661266.1	XP_965356.2	Dikarya
ctg03_AA_00494												F.velutipes
ctg03_AA_00495		XP_003037427.1	XP_001829232.1	XP_001874042.1	Pha_65030		XP_571156.1	XP_758747.1	NP_011889.1	XP_658708.1	XP_962874.1	Dikarya
ctg03_AA_00496												F.velutipes
ctg03_AA_00497		XP_003032953.1				XP_002474387.1		XP_756273.1		XP_682596.1		Dikarya
ctg03_AA_00498		XP_003037410.1	XP_001829242.2	XP_001873431.1	Pha_65004	XP_002473923.1						Agaricomycetes
ctg03_AA_00499		XP_003037409.1	XP_001829241.2	XP_001873430.1		XP_002475094.1 XP_002473938.1				XP_657621.1	XP_960931.1	Dikarya
ctg03_AA_00500		XP_003030760.1	XP_001829902.2	XP_001881620.1	Pha_65584				NP_009630.3		XP_961289.2	Dikarya
ctg03_AA_00501		XP_003038746.1	XP_001829195.1	XP_001873405.1								Agaricales
ctg03_AA_00502		XP_003038747.1	XP_001829194.1	XP_001873404.1								Agaricales
ctg03_AA_00503		XP_003037412.1	XP_001829193.2	XP_001874021.1	Pha_99528		XP_571671.1	XP_762235.1	NP_014180.1	XP_658333.1	XP_955912.1	Dikarya
ctg03_AA_00504												F.velutipes
ctg03_AA_00505												F.velutipes
ctg03_AA_00506												F.velutipes
ctg03_AA_00507		XP_003037417.1	XP_001829191.2		Pha_76816	XP_002474317.1			NP_011725.1			Dikarya
ctg03_AA_00508		XP_003038749.1	XP_001835893.1	XP_001873403.1								Agaricales
ctg03_AA_00509		XP_003038744.1	XP_001829189.2	XP_001874020.1	Pha_30116		XP_569921.1	XP_760110.1	NP_013848.1	XP_661058.1	XP_001728360.1	Dikarya
ctg03_AA_00510		XP_003037408.1	XP_001829188.1	XP_001873402.1	Pha_76814	XP_002474304.1	XP_571083.1	XP_762217.1	NP_009565.1	XP_660572.1	XP_965144.2	Dikarya
ctg03_AA_00511												F.velutipes
ctg03_AA_00512		XP_003037403.1	XP_001829187.2	XP_001873401.1		XP_002474302.1 XP_002474301.1	XP_571229.1	XP_758667.1		XP_659780.1	XP_962628.1	Dikarya
ctg03_AA_00513		XP_003038743.1	XP_001829186.2	XP_001874019.1	Pha_76810		XP_568111.1	XP_759432.1		XP_661356.1	XP_959530.1	Dikarya
ctg03_AA_00514		XP_003037405.1	XP_001829184.2	XP_001873400.1								Agaricales
ctg03_AA_00515		XP_003037404.1	XP_001829183.1	XP_001873399.1	Pha_76688							Agaricomycetes
ctg03_AA_00516		XP_003038742.1	XP_001832317.2 XP_001829182.2	XP_001874018.1	Pha_76686	XP_002469562.1						Agaricomycetes
ctg03_AA_00517		XP_003037401.1	XP_001829181.1	XP_001873398.1	Pha_99463	XP_002475691.1	XP_571690.1	XP_756887.1	NP_011930.1		XP_962957.1	Dikarya
ctg03_AA_00518		XP_003038741.1	XP_001840096.1		Pha_94554 Pha_76674				NP_011972.1	XP_658027.1	XP_963931.1	Dikarya
ctg03_AA_00519		XP_003029480.1	XP_001829917.1	XP_001881711.1	Pha_78441							Agaricomycetes
ctg03_AA_00520			XP_002911570.1	XP_001881545.1								Agaricales
ctg03_AA_00521		XP_003029880.1	XP_002911571.1	XP_001881544.1	Pha_97992			XP_756514.1		XP_661849.1	XP_001728307.1 XP_960356.2	Dikarya
ctg03_AA_00522		XP_003038738.1	XP_001829176.2	XP_001874015.1	Pha_94409	XP_002477038.1	XP_566969.1	XP_756716.1				Basidiomycota
ctg03_AA_00523		XP_003038723.1	XP_001829155.2	XP_001874001.1	Pha_76707	XP_002475688.1 XP_002469602.1	XP_569591.1 XP_569144.1	XP_758582.1	NP_012788.2		XP_964019.1	Dikarya
ctg03_AA_00524		XP_003038724.1	XP_001829156.1	XP_001874002.1	Pha_76705		XP_570615.1					Basidiomycota
ctg03_AA_00525		XP_003038725.1	XP_001829157.1	XP_001874003.1			XP_571563.1				XP_961120.1	Dikarya
ctg03_AA_00526		XP_003038729.1	XP_002912173.1	XP_001874007.1	Pha_76692				NP_013579.1	XP_659533.1	XP_957531.2	Dikarya
ctg03_AA_00527								XP_759038.1		XP_659579.1	XP_963569.2	Dikarya
ctg03_AA_00528												F.velutipes
ctg03_AA_00529		XP_003037388.1	XP_001829162.2	XP_001873389.1	Pha_76696		XP_570270.1	XP_756851.1				Basidiomycota
ctg03_AA_00530		XP_003038726.1	XP_001829161.1	XP_001874004.1	Pha_76698		XP_567231.1		NP_010371.1	XP_662193.1	XP_961283.1	Dikarya
ctg03_AA_00531		XP_003037387.1	XP_001829160.2	XP_001873388.1		XP_002472529.1						Agaricomycetes
ctg03_AA_00532		XP_003037386.1	XP_001829159.2	XP_001873387.1	Pha_76702		XP_569922.1	XP_757650.1				Basidiomycota
ctg03_AA_00533		XP_003037385.1	XP_001829158.2	XP_001873386.1			XP_570656.1	XP_760444.1	NP_014534.1	XP_661296.1	XP_963680.1	Dikarya
ctg03_AA_00534												F.velutipes
ctg03_AA_00535		XP_003037393.1	XP_001829172.2	XP_001874012.1	Pha_70432			XP_759110.1			XP_957790.1	Dikarya
ctg03_AA_00536		XP_003038734.1		XP_001873395.1	Pha_70434	XP_002474384.1		XP_758233.1				Basidiomycota
ctg03_AA_00537		XP_003037392.1	XP_001829173.2	XP_001874013.1	Pha_70438	XP_002474383.1	XP_571551.1	XP_757792.1		XP_657859.1	XP_964357.1	Dikarya
ctg03_AA_00538		XP_003037394.1	XP_001829171.2	XP_001874011.1	Pha_70431	XP_002474373.1	XP_569101.1	XP_759395.1	NP_012014.1	XP_680698.1	XP_960920.2	Dikarya
ctg03_AA_00539		XP_003038735.1	XP_001829170.1	XP_001873394.1	Pha_70430	XP_002474385.1	XP_569100.1	XP_760353.1				Basidiomycota
ctg03_AA_00540	ctg03_AA_00541	XP_003037395.1	XP_001829169.1	XP_001874010.1	Pha_96824		XP_566893.1	XP_759876.1	NP_014431.1	XP_664154.1	XP_961576.1	Dikarya
ctg03_AA_00541	ctg03_AA_00540	XP_003037395.1	XP_001829169.1	XP_001874010.1	Pha_96824		XP_566893.1	XP_759876.1	NP_014431.1	XP_664154.1	XP_961576.1	Dikarya
ctg03_AA_00542		XP_003037396.1	XP_001831972.2									Agaricales
ctg03_AA_00543			XP_001831254.1	XP_001875093.1								Agaricales
ctg03_AA_00544		XP_003038732.1	XP_001829168.2	XP_001873393.1	Pha_70423		XP_568167.1				XP_959052.2	Dikarya
ctg03_AA_00545		XP_003037389.1	XP_002912174.1	XP_001873392.1	Pha_99534		XP_571704.1	XP_757928.1		XP_660514.1	XP_955988.1	Dikarya
ctg03_AA_00546		XP_003037390.1	XP_001829167.1	XP_001874009.1	Pha_70422		XP_567481.1	XP_758995.1	NP_013409.1		XP_961337.1	Dikarya
ctg03_AA_00547		XP_003038731.1	XP_001829166.1	XP_001874008.1	Pha_76837		XP_571940.1	XP_761656.1	NP_010372.1			Dikarya
ctg03_AA_00548		XP_003038730.1	XP_001829165.2		Pha_76684	XP_002469563.1		XP_757453.1		XP_682328.1	XP_959800.1	Dikarya
ctg03_AA_00549		XP_003038736.1	XP_002912176.1	XP_001873396.1	Pha_76884	XP_002477032.1 XP_002475445.1						Agaricomycetes
ctg03_AA_00550												F.velutipes
ctg03_AA_00551												F.velutipes
ctg03_AA_00552	ctg29_AA_00576	XP_003036961.1										Agaricales
ctg03_AA_00553		XP_003038809.1	XP_002912170.1	XP_001877070.1	Pha_76785	XP_002475164.1	XP_566489.1	XP_759633.1	NP_012263.1	XP_681497.1	XP_961696.1	Dikarya
ctg03_AA_00554												F.velutipes
ctg03_AA_00555		XP_003038817.1	XP_001829128.2		Pha_99518		XP_568468.1		NP_011106.1	XP_682361.1		Dikarya
ctg03_AA_00556												F.velutipes
ctg03_AA_00557			XP_001829129.2	XP_001873993.1	Pha_76737	XP_002475679.1						Agaricomycetes
ctg03_AA_00558		XP_003038821.1	XP_001829130.2	XP_001873375.1	Pha_76739	XP_002475685.1	XP_572503.1	XP_756727.1				Basidiomycota
ctg03_AA_00559		XP_003038820.1	XP_001829132.1	XP_001873994.1	Pha_76744		XP_570853.1	XP_756729.1	NP_014156.2	XP_660360.1	XP_964240.1	Dikarya
ctg03_AA_00560		XP_003037489.1	XP_001829133.2	XP_001873377.1	Pha_76745		XP_572772.1		NP_011627.1	XP_662357.1	XP_964521.1	Dikarya
ctg03_AA_00561		XP_003037490.1	XP_001829134.2	XP_001873378.1	Pha_76746							Agaricomycetes
ctg03_AA_00562		XP_003038818.1	XP_001829136.2	XP_001873379.1	Pha_76752			XP_756955.1	NP_014359.1	XP_664179.1	XP_959056.1	Dikarya
ctg03_AA_00563		XP_003034839.1				XP_002473867.1				XP_682587.1 XP_681129.1	XP_963903.2 XP_961650.2	Dikarya
ctg03_AA_00564		XP_003038825.1	XP_001829137.2	XP_001873380.1	Pha_99495		XP_567150.1					Basidiomycota
ctg03_AA_00565		XP_003037493.1	XP_001829142.1		Pha_76730		XP_569888.1	XP_760067.1	NP_012498.1	XP_661188.1	XP_965318.1	Dikarya
ctg03_AA_00566		XP_003037494.1	XP_001829141.2	XP_001873997.1	Pha_76727		XP_569952.1	XP_760414.1	NP_011846.1 NP_012885.2	XP_657667.1	XP_956405.1	Dikarya
ctg03_AA_00567	ctg06_AA_00353	XP_003038823.1 XP_003028038.1	XP_001829140.1 XP_001834288.2	Lacc XP_001873382.1 Lacc XP_001880038.1	Pha_30070Pha_29949		XP_570204.1 XP_572718.1	XP_758593.1	NP_014794.1 NP_014850.1	XP_682389.1 XP_657925.1	XP_957106.2 XP_957195.1	Dikarya
ctg03_AA_00568		XP_003038824.1	XP_001829139.2		Pha_76725			XP_759588.1		XP_662762.1	XP_963375.1	Dikarya
ctg03_AA_00569		XP_003038832.1	XP_001829144.2	XP_001873999.1	Pha_76716		XP_567167.1	XP_756823.1	NP_015216.3	XP_664600.1	XP_960562.2	Dikarya
ctg03_AA_00570		XP_003037498.1	XP_001829145.1	XP_001873383.1	Pha_99481	XP_002469559.1	XP_572506.1	XP_757256.1	NP_012398.1	XP_661686.1	XP_961013.1	Dikarya
ctg03_AA_00571		XP_003035289.1	XP_002911780.1	XP_001882885.1	Pha_98820	XP_002475856.1	XP_572318.1	XP_756455.1	NP_012808.1	XP_661551.1	XP_957961.2	Dikarya
ctg03_AA_00572		XP_003026407.1	XP_001839210.2 XP_001839084.2	XP_001874386.1		XP_002476993.1 XP_002471114.1						Agaricomycetes
ctg03_AA_00573		XP_003038552.1	XP_001829147.2	XP_001873384.1		XP_002475683.1	XP_567264.1	XP_759451.1		XP_659160.1		Dikarya
ctg03_AA_00574					Pha_65707							Agaricomycetes
ctg03_AA_00575		XP_003038831.1										Agaricales
ctg03_AA_00576		XP_003029165.1	XP_001830967.2	XP_001889717.1 XP_001890586.1	Pha_67859	XP_002469652.1	XP_572867.1	XP_761309.1	NP_011575.1	XP_681390.1	XP_962034.1	Dikarya
ctg03_AA_00577	ctg29_AA_00534ctg29_AA_00665			XP_001889634.1								Agaricales
ctg03_AA_00578		XP_003027486.1	XP_001837657.2 XP_001832587.1	XP_001885553.1	Pha_76490		XP_566905.1	XP_758823.1	NP_013218.1	XP_658863.1	XP_965102.1	Dikarya
ctg03_AA_00579												F.velutipes
ctg03_AA_00580		XP_003037478.1	XP_001829110.1	XP_001873368.1	Pha_76846		XP_569958.1	XP_756949.1	NP_013850.1	XP_664809.1	XP_958516.1	Dikarya
ctg03_AA_00581			XP_001829107.2		Pha_76845							Agaricomycetes
ctg03_AA_00582		XP_003030383.1 XP_003027880.1	XP_001837854.1	XP_001885198.1	Pha_97390 Pha_68162		XP_570813.1	XP_756158.1 XP_761507.1	NP_010528.1	XP_682046.1XP_681572.1XP_661561.1XP_660266.1	XP_961990.1	Dikarya
ctg03_AA_00583		XP_003038797.1	XP_002912168.1	XP_001873363.1		XP_002475440.1						Agaricomycetes
ctg03_AA_00584		XP_003037475.1	XP_001829101.1	XP_001873980.1		XP_002475434.1						Agaricomycetes
ctg03_AA_00585		XP_003037151.1	XP_001840941.2	XP_001889028.1 XP_001889026.1 XP_001889013.1	Pha_69044	XP_002477136.1		XP_762637.1				Basidiomycota
ctg03_AA_00586		XP_003038801.1	XP_001829102.2	XP_001873365.1	Pha_70416	XP_002477532.1	XP_568572.1	XP_756959.1	NP_011280.1	XP_664145.1	XP_956400.1	Dikarya
ctg03_AA_00587		XP_003037474.1	XP_001829103.2	XP_001873981.1		XP_002477280.1						Agaricomycetes
ctg03_AA_00588		XP_003037473.1	XP_001829104.2	XP_001873982.1	Pha_70418							Agaricomycetes
ctg03_AA_00589		XP_003038800.1	XP_001829105.2	XP_001873366.1	Pha_70419		XP_567414.1	XP_756747.1	NP_013126.1	XP_868908.1	XP_965538.2	Dikarya
ctg03_AA_00590		XP_003037472.1	XP_001829106.1	XP_001873983.1	Pha_70420	XP_002475433.1	XP_570477.1	XP_756863.1	NP_010068.1	XP_662352.1	XP_964518.1	Dikarya
ctg03_AA_00591		XP_003035243.1	XP_002911876.1	XP_001874839.1		XP_002476193.1						Agaricomycetes
ctg03_AA_00592		XP_003030145.1	XP_001830383.1	XP_001880429.1	Pha_66631	XP_002477617.1	XP_572756.1	XP_760588.1	NP_009717.1	XP_663465.1	XP_957031.1	Dikarya
ctg03_AA_00593		XP_003030954.1	XP_001837716.2		Pha_76994		XP_568745.1	XP_759134.1		XP_660465.1	XP_958369.1	Dikarya
ctg03_AA_00594		XP_003037469.1	XP_002912166.1	XP_001873361.1				XP_761679.1				Basidiomycota
ctg03_AA_00595		XP_003034476.1 XP_003036205.1		XP_001873979.1 XP_001875666.1 XP_001875664.1	Pha_70389 Pha_70390	XP_002473166.1		XP_761963.1		XP_680900.1	XP_965817.1	Dikarya
ctg03_AA_00596			XP_001829125.1		Pha_99512			XP_756896.1				Basidiomycota
ctg03_AA_00597		XP_003038814.1		XP_001873991.1	Pha_76794	XP_002475176.1						Agaricomycetes
ctg03_AA_00598		XP_003037484.1	XP_001829127.2	XP_001873374.1	Pha_76796		XP_572666.1	XP_760436.1	NP_015513.1	XP_660351.1	XP_001728485.1	Dikarya
ctg03_AA_00599		XP_003038815.1	XP_001831437.2	XP_001874621.1	Pha_76798		XP_566762.1		NP_014668.1		XP_959116.1	Dikarya
ctg03_AA_00600		XP_003038810.1	XP_001829123.2	XP_001873372.1	Pha_76784	XP_002475163.1	XP_571983.1	XP_756876.1	NP_014547.1	XP_664121.1	XP_001728317.1	Dikarya
ctg03_AA_00601		XP_003037480.1	XP_001829122.2	XP_001873990.1	Pha_68734		XP_568779.1	XP_759649.1	NP_011875.1	XP_660710.1	XP_963172.2	Dikarya
ctg03_AA_00602		XP_003038811.1	XP_001829121.1	XP_001873371.1	Pha_76782		XP_572930.1	XP_757984.1	NP_009896.2	XP_659372.1	XP_960359.2	Dikarya
ctg03_AA_00603			XP_001829120.1	XP_001873370.1								Agaricales
ctg03_AA_00604		XP_003038813.1	XP_001829117.2	XP_001873369.1	Pha_76777	XP_002474307.1	XP_570978.1	XP_760027.1		XP_659459.1 XP_658934.1	XP_956792.1 XP_961329.1	Dikarya
ctg03_AA_00605		XP_003036991.1 XP_003037482.1 XP_003031379.1	XP_001829116.2	XP_001873988.1	Pha_76856	XP_002476567.1 XP_002477756.1	XP_571750.1	XP_762040.1	NP_012142.1	XP_664595.1 XP_662983.1 XP_660954.1 XP_660880.1	XP_962420.1 XP_965604.1	Dikarya
ctg03_AA_00606												F.velutipes
ctg03_AA_00607		XP_003037465.1	XP_001829090.1	XP_001873357.1								Agaricales
ctg03_AA_00608		XP_003037466.1	XP_001829091.1	XP_001873358.1	Pha_70398	XP_002475441.1						Agaricomycetes
ctg03_AA_00609		XP_003037467.1	XP_001829092.1	XP_001873359.1	Pha_70396		XP_570453.1	XP_756732.1	NP_010134.1	XP_662379.1	XP_965423.1	Dikarya
ctg03_AA_00610		XP_003038796.1	XP_001829093.1		Pha_70395		XP_570247.1	XP_757289.1	NP_012173.1	XP_662038.1	XP_956452.1	Dikarya
ctg03_AA_00611		XP_003032663.1	XP_001832663.2	XP_001881171.1	Pha_100127		XP_570951.1	XP_760708.1	NP_009965.2	XP_681264.1	XP_956320.2	Dikarya
ctg03_AA_00612												F.velutipes
ctg03_AA_00613	ctg13_AA_00640	XP_003032662.1								XP_663468.1		Dikarya
ctg03_AA_00614		XP_003037604.1	XP_002912144.1	XP_001873307.1	Pha_68073		XP_572386.1	XP_758788.1	NP_010551.1	XP_663285.1	XP_964203.1	Dikarya
ctg03_AA_00615		XP_003037676.1 XP_003038944.1	XP_001828963.2 XP_002912050.1	XP_001873308.1 XP_001879133.1 XP_001876333.1 XP_001886869.1	Pha_95890Pha_30491		XP_571532.1	XP_760519.1	NP_012980.1	XP_657722.1	XP_962616.1	Dikarya
ctg03_AA_00616		XP_003038940.1	XP_001828964.1	XP_001873914.1	Pha_71084		XP_572893.1	XP_760744.1	NP_011890.1	XP_682112.1	XP_961067.1	Dikarya
ctg03_AA_00617		XP_003038792.1	XP_001829086.1	XP_001873977.1	Pha_70383	XP_002477408.1	XP_570705.1	XP_756825.1	NP_013956.1	XP_659751.1	XP_962876.2	Dikarya
ctg03_AA_00618			XP_001829085.2		Pha_70382		XP_570229.1					Basidiomycota
ctg03_AA_00619												F.velutipes
ctg03_AA_00620		XP_003037483.1	XP_001829115.1	XP_001873987.1	Pha_99540	XP_002474582.1	XP_570917.1	XP_760595.1				Basidiomycota
ctg03_AA_00621		XP_003038802.1	XP_001829114.2	XP_001878863.1	Pha_76851 Pha_76850	XP_002474300.1	XP_572292.1	XP_760421.1	NP_011836.1	XP_660459.1	XP_957214.2	Dikarya
ctg03_AA_00622												F.velutipes
ctg03_AA_00623		XP_003038806.1	XP_002912169.1		Pha_76848		XP_569735.1	XP_756888.1	NP_011790.1	XP_661511.1	XP_965687.1	Dikarya
ctg03_AA_00624		XP_003038805.1	XP_001829111.2	XP_001873986.1	Pha_30135			XP_756858.1				Basidiomycota
ctg03_AA_00625	ctg11-2_AA_00906											F.velutipes
ctg03_AA_00626		XP_003037600.1	XP_001828965.1		Pha_68071							Agaricomycetes
ctg03_AA_00627		XP_003033711.1	XP_001835634.1	XP_001875742.1		XP_002473806.1		XP_757742.1	NP_012523.2			Dikarya
ctg03_AA_00628		XP_003038962.1	XP_001828972.1	XP_001873916.1	Pha_77592		XP_569111.1	XP_757820.1	NP_010686.1	XP_659587.1		Dikarya
ctg03_AA_00629		XP_003037622.1	XP_001828973.2	XP_001873312.1	Pha_77593	XP_002472252.1 XP_002471341.1 XP_002476573.1	XP_572222.1		NP_015294.1	XP_681530.1 XP_659471.1	XP_958274.1	Dikarya
ctg03_AA_00630		XP_003039003.1	XP_002912146.1	XP_001873917.1	Pha_77568	XP_002472251.1				XP_660706.1	XP_955920.1	Dikarya
ctg03_AA_00631												F.velutipes
ctg03_AA_00632		XP_003037666.1		Lacc XP_001879505.1 Lacc XP_001873313.1	Pha_97046Pha_77575		XP_567322.1	XP_757813.1 XP_760207.1	NP_013452.1	XP_663858.1	XP_956963.2	Dikarya
ctg03_AA_00633			XP_001832295.1									Agaricales
ctg03_AA_00634		XP_003038995.1	XP_001828977.1		Pha_72436Pha_72470					XP_662968.1	XP_965177.1	Dikarya
ctg03_AA_00635		XP_003037605.1	XP_001828980.1	XP_001873314.1	Pha_77602		XP_572072.1	XP_760901.1	NP_011344.1	XP_658548.1	XP_964745.1	Dikarya
ctg03_AA_00636		XP_003038947.1	XP_001828982.2	XP_001873919.1	Pha_99845		XP_568874.1	XP_760131.1	NP_011095.1	XP_680581.1	XP_962692.2	Dikarya
ctg03_AA_00637		XP_003037607.1	XP_002912148.1	XP_001873315.1	Pha_77597		XP_566686.1		NP_010903.1		XP_956747.1	Dikarya
ctg03_AA_00638		XP_003037602.1	XP_001828985.1	XP_001873316.1	Pha_30595	XP_002472272.1	XP_569739.1	XP_761183.1 XP_760515.1		XP_657849.1		Dikarya
ctg03_AA_00639	ctg03_AA_00974ctg05_AA_00428ctg11-2_AA_00823ctg11-2_AA_00984											F.velutipes
ctg03_AA_00640	ctg03_AA_00972ctg05_AA_00338ctg05_AA_00426ctg11-2_AA_00821ctg33_AA_00996											F.velutipes
ctg03_AA_00641	ctg03_AA_00970ctg05_AA_00337ctg05_AA_00419ctg05_AA_00420ctg11-2_AA_00085ctg11-2_AA_00086ctg33_AA_00995											F.velutipes
ctg03_AA_00642		XP_003038964.1	XP_001828989.1	XP_001873322.1	Pha_30592		XP_571549.1	XP_758213.1	NP_015220.1			Dikarya
ctg03_AA_00643		XP_003038965.1	XP_001828990.1	XP_001873321.1	Pha_30593		XP_572213.1	XP_757960.1	NP_009779.1	XP_662440.1	XP_964918.2	Dikarya
ctg03_AA_00644		XP_003037624.1		XP_001873923.1								Agaricales
ctg03_AA_00645		XP_003037619.1	XP_001828991.1	XP_001873320.1	Pha_100523		XP_571445.1	XP_756497.1	NP_013728.1	XP_661646.1	XP_961915.1	Dikarya
ctg03_AA_00646		XP_003037617.1				XP_002471898.1	XP_571367.1					Basidiomycota
ctg03_AA_00647												F.velutipes
ctg03_AA_00648		XP_003037598.1	XP_001828624.2	XP_001873613.1	Pha_64434	XP_002473545.1	XP_571001.1	XP_760874.1		XP_660728.1	XP_961843.1	Dikarya
ctg03_AA_00649		XP_003037595.1	XP_002912099.1	XP_001873612.1	Pha_94516			XP_761694.1	NP_011743.2	XP_663506.1	XP_962486.1	Dikarya
ctg03_AA_00650		XP_003038633.1 XP_003032952.1	XP_001834272.1 XP_001828620.2 XP_001830736.2 XP_001834709.1XP_001834704.1	XP_001883209.1	Pha_64422		XP_571061.1		NP_013043.1	XP_659804.1		Dikarya
ctg03_AA_00651	ctg13_AA_00409ctg33_AA_01101	XP_003030241.1 XP_003026112.1 XP_003026601.1 XP_003038920.1	XP_001838398.1XP_001834746.2XP_001828619.2XP_002911587.1XP_001840321.2XP_001829990.1	XP_001883373.1 XP_001888519.1 XP_001874246.1 XP_001883172.1 XP_001888770.1	Pha_72605Pha_64013Pha_63621Pha_76573Pha_94387Pha_77415Pha_22723Pha_74371Pha_24039	XP_002470595.1XP_002471774.1	XP_567897.1XP_569954.1	XP_760494.1XP_758534.1	NP_012323.1	XP_680866.1XP_664792.1	XP_964577.1XP_001728488.1XP_962386.1	Dikarya
ctg03_AA_00652		XP_003038921.1	XP_001828618.1	XP_001873610.1	Pha_64419		XP_569520.1	XP_756259.1	NP_013064.1	XP_664510.1	XP_001728133.1	Dikarya
ctg03_AA_00653			XP_001828617.2		Pha_64418		XP_566675.1	XP_761506.1	NP_014649.1	XP_658886.1	XP_001728325.1	Dikarya
ctg03_AA_00654		XP_003038677.1	XP_001828616.2	XP_001873609.1	Pha_64410				NP_013025.1			Dikarya
ctg03_AA_00655		XP_003037326.1	XP_001828615.2		Pha_64409		XP_571955.1	XP_760899.1	NP_010652.1	XP_662800.1	XP_959268.2	Dikarya
ctg03_AA_00656		XP_003037170.1	XP_001828613.1		Pha_22713		XP_566517.1	XP_757826.1	NP_010882.1	XP_661648.1	XP_962679.1	Dikarya
ctg03_AA_00657		XP_003038678.1	XP_001829025.2	XP_001873327.1	Pha_22711		XP_569178.1	XP_759191.1		XP_662488.1	XP_959914.1	Dikarya
ctg03_AA_00658		XP_003038675.1	XP_001829024.1		Pha_64401						XP_961715.1	Dikarya
ctg03_AA_00659		XP_003028630.1	XP_001840130.2	XP_001879773.1	Pha_66280	XP_002471172.1	XP_571952.1	XP_759902.1	NP_011295.1	XP_661290.1	XP_959969.1	Dikarya
ctg03_AA_00660		XP_003037434.1	XP_001829019.2	XP_001873937.1	Pha_64212							Agaricomycetes
ctg03_AA_00661		XP_003037432.1	XP_001829020.2	XP_001873939.1	Pha_64217		XP_569866.1	XP_761153.1				Basidiomycota
ctg03_AA_00662		XP_003037431.1	XP_001829021.1	XP_001873940.1	Pha_64399		XP_567616.1	XP_758103.1	NP_013269.1	XP_661899.1	XP_960953.1	Dikarya
ctg03_AA_00663		XP_003037430.1	XP_001829022.2	XP_001873941.1	Pha_64400		XP_569624.1	XP_757252.1	NP_012733.1	XP_658618.1	XP_957174.1	Dikarya
ctg03_AA_00664		XP_003037323.1	XP_001829023.2	XP_001873942.1	Pha_64413		XP_566470.1					Basidiomycota
ctg03_AA_00665		XP_003037435.1	XP_002912155.1	XP_001873326.1	Pha_64210	XP_002473544.1 XP_002473316.1	XP_568092.1	XP_757691.1	NP_014428.1 NP_009998.2	XP_658784.1	XP_964164.1	Dikarya
ctg03_AA_00666		XP_003038762.1	XP_001829016.2	XP_001873936.1	Pha_94422	XP_002473303.1	XP_571606.1	XP_757834.1	NP_011689.1	XP_659848.1	XP_961549.2	Dikarya
ctg03_AA_00667		XP_003038766.1	XP_001828626.2	XP_001873615.1	Pha_94515		XP_567967.1	XP_758126.1	NP_010424.1	XP_659708.1	XP_964308.1	Dikarya
ctg03_AA_00668		XP_003037440.1	XP_001828628.2	XP_001873616.1	Pha_64412	XP_002473558.1	XP_571354.1	XP_756684.1				Basidiomycota
ctg03_AA_00669		XP_003037441.1	XP_001832502.1 XP_001828627.2	XP_001874248.1	Pha_64417	XP_002473559.1 XP_002473301.1	XP_569615.1	XP_760964.1	NP_014729.1 NP_013639.1	XP_682418.1	XP_964416.2	Dikarya
ctg03_AA_00670		XP_003038769.1	XP_001828629.2	XP_001873617.1	Pha_68262		XP_567680.1	XP_759099.1		XP_662746.1	XP_956847.2	Dikarya
ctg03_AA_00671		XP_003034406.1	XP_001828477.1	XP_001885706.1		XP_002476710.1						Agaricomycetes
ctg03_AA_00672												F.velutipes
ctg03_AA_00673	ctg03_AA_00674	XP_003038503.1	XP_001828999.2		Pha_68275	XP_002472259.1	XP_572831.1	XP_757859.1		XP_681933.1 XP_657838.1	XP_964282.1	Dikarya
ctg03_AA_00674	ctg03_AA_00673	XP_003038503.1	XP_001828999.2		Pha_68275	XP_002472259.1	XP_572831.1	XP_757859.1		XP_681933.1 XP_657838.1	XP_964282.1	Dikarya
ctg03_AA_00675		XP_003038502.1	XP_001829001.1	XP_001873925.1	Pha_68273	XP_002474828.1 XP_002469028.1						Agaricomycetes
ctg03_AA_00676	ctg26_AA_00482	XP_003037156.1	XP_001829785.2 XP_001829003.2	XP_001873926.1 XP_001881743.1			XP_567474.1					Basidiomycota
ctg03_AA_00677	ctg01_AA_00169	XP_003033819.1 XP_003031300.1	XP_001837864.2 XP_001838344.1	Lacc XP_001878739.1 Lacc XP_001889672.1	Pha_68037Pha_96708Pha_70167	XP_002474503.1	XP_567314.1 XP_567302.1			XP_659123.1	XP_960365.2	Dikarya
ctg03_AA_00678		XP_003038985.1	XP_001829004.2	XP_001873324.1	Pha_93990		XP_571248.1	XP_757818.1	NP_011880.1	XP_661772.1	XP_957527.1	Dikarya
ctg03_AA_00679	ctg03_AA_00680		XP_002912149.1		Pha_24911							Agaricomycetes
ctg03_AA_00680	ctg03_AA_00679											F.velutipes
ctg03_AA_00681		XP_003038780.1	XP_001828853.2	XP_001873927.1	Pha_68248	XP_002471892.1 XP_002470029.1	XP_571585.1	XP_756792.1	NP_011082.1			Dikarya
ctg03_AA_00682		XP_003037447.1	XP_001829009.2	XP_001873928.1	Pha_95980	XP_002470063.1						Agaricomycetes
ctg03_AA_00683		XP_003038500.1	XP_001831707.1 XP_002912150.1	XP_001880274.1 XP_001873929.1	Pha_64227	XP_002471931.1	XP_568714.1	XP_757787.1	NP_014038.1 NP_013447.1	XP_680780.1 XP_661334.1	XP_958678.1	Dikarya
ctg03_AA_00684		XP_003037139.1	XP_002912151.1	XP_001873930.1			XP_568617.1	XP_756506.1				Basidiomycota
ctg03_AA_00685		XP_003038488.1	XP_001829011.2	XP_001873325.1	Pha_94425		XP_570011.1	XP_758205.1	NP_013290.1	XP_662205.1	XP_001728520.1	Dikarya
ctg03_AA_00686		XP_003028420.1	XP_001838198.2	XP_001886893.1	Pha_66552	XP_002472366.1	XP_567113.1	XP_756686.1	NP_014102.1	XP_661247.1	XP_960113.2	Dikarya
ctg03_AA_00687		XP_003037138.1	XP_001829012.2	XP_001873931.1	Pha_64223 Pha_68249					XP_658031.1	XP_965691.2	Dikarya
ctg03_AA_00688		XP_003026153.1 XP_003038776.1 XP_003030729.1		XP_001874253.1	Pha_68414Pha_68238	XP_002475983.1	XP_571035.1	XP_759943.1	NP_013943.1	XP_664789.1	XP_959146.2	Dikarya
ctg03_AA_00689		XP_003037993.1	XP_001828410.1		Pha_95977	XP_002471916.1	XP_567110.1					Basidiomycota
[truncated: 10,220 more rows]
